# Supplementary material for: Microfluidic genome-wide profiling of intrinsic electrical properties in Saccharomyces cerevisiae
Source: Royal Society of Chemistry journal article supplement (doi:10.1039/c3lc50162k), 2013-01-01
Supplement: c3lc50162k.xlsx [file c3lc50162k.xlsx]

## Sheet: Sheet1
Systematic name	Common name	Electrical Log Ratios				Effective cond.
		y (1)	y (2)	y (avg.)	Δy	Average	Spread
YAL004W	YAL004W	0.1	0.1844	0.1422	0.0597	0.0307	0.0071
YAL005C	SSA1	1.3021	0.0792	0.6907	0.8647	0.0311	0.0071
YAL008W	FUN14	0.7071	0.505	0.6061	0.1429	0.031	0.0069
YAL010C	MDM10	1.1938	1.0011	1.0975	0.1363	0.031	0.0074
YAL011W	SWC1	0.9118	0.2971	0.6044	0.4347	0.0308	0.0072
YAL012W	CYS3	0.8687	0.8813	0.875	0.0089	0.0323	0.0071
YAL015C	NTG1	0.1733	0.4485	0.3109	0.1946	0.0309	0.007
YAL017W	PSK1	0.4282	-0.2412	0.0935	0.4734	0.0302	0.0069
YAL018C	YAL018C	-0.0878	0.3239	0.1181	0.2912	0.0306	0.0071
YAL019W	FUN30	0.5747	-0.3612	0.1068	0.6618	0.0301	0.0069
YAL020C	ATS1	0.9582	-0.2048	0.3767	0.8223	0.0299	0.007
YAL021C	CCR4	0.4353	0.2306	0.333	0.1447	0.0305	0.007
YAL022C	FUN26	-0.7027	0.2412	-0.2307	0.6674	0.0302	0.0071
YAL023C	PMT2	-0.2332	-0.3374	-0.2853	0.0737	0.0299	0.0068
YAL024C	LTE1	1.1924	0.3051	0.7487	0.6274	0.0305	0.007
YAL026C	DRS2	0.476	0.2794	0.3777	0.1391	0.031	0.007
YAL027W	YAL027W	0.4279	-0.0609	0.1835	0.3457	0.0305	0.007
YAL028W	FRT2	0.5757	0.3401	0.4579	0.1666	0.0308	0.0069
YAL029C	MYO4	0.4689	0.1044	0.2867	0.2578	0.0305	0.007
YAL030W	SNC1	1.1497	-0.18	0.4848	0.9402	0.0301	0.0069
YAL031C	FUN21	-0.0664	0.2311	0.0824	0.2104	0.0303	0.0071
YAL034C	FUN19	1.3201	0.245	0.7826	0.7602	0.0306	0.0069
YAL035W	FUN12	0.5333	0.179	0.3562	0.2506	0.0306	0.0071
YAL036C	FUN11	0.3463	-0.0928	0.1268	0.3105	0.0305	0.0071
YAL037W	YAL037W	0.3213	0.0632	0.1923	0.1825	0.0303	0.0069
YAL039C	CYC3	0.6344	0.6335	0.634	0.0006	0.0315	0.0071
YAL040C	CLN3	-0.1462	-0.0339	-0.09	0.0794	0.0306	0.0069
YAL042W	ERV46	0.2139	0.3369	0.2754	0.0869	0.0302	0.0069
YAL043C-A	YAL043C-A	0.1554	-0.0215	0.0669	0.1251	0.0302	0.0069
YAL045C	YAL045C	0.2973	0.4141	0.3557	0.0826	0.0304	0.007
YAL046C	YAL046C	0.4045	0.177	0.2907	0.1609	0.0303	0.0069
YAL048C	GON1	0.3307	0.3241	0.3274	0.0047	0.0303	0.0068
YAL049C	YAL049C	0.8592	0.5077	0.6834	0.2485	0.0321	0.0073
YAL051W	OAF1	0.4584	0.1895	0.3239	0.1901	0.031	0.007
YAL054C	ACS1	0.1539	-0.1783	-0.0122	0.2349	0.0304	0.0068
YAL055W	PEX22	-0.4937	-0.1574	-0.3255	0.2378	0.0298	0.0072
YAL056W	GPB2	0.4636	0.2151	0.3394	0.1758	0.0316	0.0073
YAL058C-A	YAL058C-A	0.6878	-0.1164	0.2857	0.5687	0.0306	0.0069
YAL058W	CNE1	-0.0035	0.0107	0.0036	0.0101	0.0305	0.007
YAL059W	ECM1	-0.2245	0.5488	0.1621	0.5468	0.0301	0.007
YAL060W	BDH1	0.0254	-0.0123	0.0066	0.0266	0.0301	0.0069
YAL061W	YAL061W	-0.1022	-0.2683	-0.1853	0.1174	0.0301	0.0069
YAL062W	GDH3	0.2827	0.405	0.3439	0.0865	0.0311	0.007
YAL064C-A	YAL064C-A	-0.0796	-0.2905	-0.1851	0.1492	0.03	0.0068
YAL065C	YAL065C	0.6236	0.1278	0.3757	0.3505	0.0303	0.0069
YAL066W	YAL066W	0.1307	-0.3234	-0.0963	0.3211	0.0299	0.007
YAL067C	SEO1	0.3809	-0.1349	0.123	0.3648	0.0306	0.007
YAL068C	YAL068C	0.0772	0.2618	0.1695	0.1305	0.03	0.0069
YAR002C-A	ERP1	0.1151	0.3077	0.2114	0.1361	0.0304	0.0068
YAR002W	NUP60	1.0272	0.6876	0.8574	0.2401	0.0317	0.0078
YAR003W	SWD1	0.9097	0.8428	0.8762	0.0473	0.03	0.007
YAR014C	BUD14	0.4025	-0.2143	0.0941	0.4361	0.0314	0.0072
YAR015W	ADE1	1.1316	1.2067	1.1692	0.0531	0.0323	0.0073
YAR020C	PAU7	0.3182	-1.0473	-0.3646	0.9656	0.0299	0.0067
YAR023C	YAR023C	0.4683	0.3722	0.4203	0.068	0.0303	0.0068
YAR027W	UIP3	0.0827	-0.1368	-0.0271	0.1552	0.0298	0.007
YAR028W	YAR028W	0.1396	-0.0647	0.0374	0.1445	0.0304	0.007
YAR029W	YAR029W	0.5228	0.4613	0.492	0.0435	0.0316	0.0074
YAR030C	YAR030C	0.0196	0.1031	0.0613	0.059	0.0302	0.0068
YAR031W	PRM9	-0.1193	0.4115	0.1461	0.3754	0.0305	0.0069
YAR035W	YAT1	0.8888	0.5675	0.7282	0.2271	0.03	0.0069
YAR037W	YAR037W	1.2399	-0.1047	0.5676	0.9508	0.0299	0.0068
YAR040C	YAR040C	0.3505	-0.8036	-0.2265	0.8161	0.0305	0.0067
YAR043C	YAR043C	0.4689	0.2326	0.3508	0.1671	0.0305	0.007
YAR044W	OSH1	0.268	0.0745	0.1713	0.1369	0.0304	0.0071
YAR047C	YAR047C	0.6759	0.8687	0.7723	0.1363	0.0301	0.0066
YAR050W	FLO1	0.4045	0.0988	0.2516	0.2162	0.0304	0.007
YBL001C	ECM15	0.0544	-0.1435	-0.0446	0.1399	0.0301	0.0071
YBL003C	HTA2	-0.3257	0.2587	-0.0335	0.4132	0.0304	0.0069
YBL005W	PDR3	0.3192	-0.0645	0.1274	0.2714	0.0307	0.007
YBL006C	LDB7	1.554	-0.1681	0.6929	1.2177	0.0309	0.0071
YBL007C	SLA1	-1.0547	-1.4525	-1.2536	0.2813	0.0296	0.0075
YBL008W	HIR1	0.3007	-0.3435	-0.0214	0.4555	0.0293	0.0064
YBL009W	YBL009W	0.2468	0.4468	0.3468	0.1414	0.0304	0.0068
YBL010C	YBL010C	0.2869	0.1608	0.2239	0.0891	0.0305	0.007
YBL011W	SCT1	0.1295	-0.1508	-0.0107	0.1982	0.0299	0.0069
YBL012C	YBL012C	0.3752	1.2192	0.7972	0.5968	0.0309	0.007
YBL013W	FMT1	0.5672	0.3626	0.4649	0.1447	0.0313	0.0067
YBL015W	ACH1	-0.4809	-0.0264	-0.2537	0.3214	0.03	0.007
YBL016W	FUS3	0.0078	-0.0637	-0.0279	0.0506	0.0302	0.007
YBL017C	PEP1	-0.7526	0.1459	-0.3033	0.6354	0.0303	0.0068
YBL019W	APN2	0.132	0.812	0.472	0.4808	0.0307	0.0069
YBL021C	HAP3	0.2176	-0.4131	-0.0978	0.4459	0.0304	0.0069
YBL022C	PIM1	0.8875	0.5861	0.7368	0.2131	0.032	0.0069
YBL024W	NCL1	1.9809	0.0401	1.0105	1.3723	0.0315	0.0069
YBL027W	RPL19B	0.0614	-0.2501	-0.0944	0.2203	0.0296	0.0068
YBL028C	YBL028C	0.3726	0.1486	0.2606	0.1583	0.0304	0.0071
YBL029W	YBL029W	0.2102	0.102	0.1561	0.0765	0.0301	0.007
YBL031W	SHE1	1.0537	0.9517	1.0027	0.0722	0.0312	0.0069
YBL032W	HEK2	-0.0999	-0.4381	-0.269	0.2391	0.0304	0.0071
YBL036C	YBL036C	-0.2902	1.4022	0.556	1.1967	0.0305	0.0068
YBL037W	APL3	0.0549	-0.6254	-0.2853	0.4811	0.0298	0.0069
YBL038W	MRPL16	0.6337	0.8529	0.7433	0.155	0.0312	0.0068
YBL039C	URA7	-0.4839	-0.2415	-0.3627	0.1714	0.031	0.0074
YBL042C	FUI1	1.1354	0.413	0.7742	0.5108	0.0303	0.0067
YBL043W	ECM13	-0.0586	0.4242	0.1828	0.3414	0.0304	0.0069
YBL044W	YBL044W	-0.1988	0.1048	-0.047	0.2147	0.0311	0.007
YBL045C	COR1	1.0314	0.4178	0.7246	0.4339	0.0307	0.0066
YBL046W	YBL046W	-0.1748	-0.5154	-0.3451	0.2409	0.0294	0.0068
YBL047C	EDE1	0.3902	0.1551	0.2727	0.1663	0.0305	0.007
YBL048W	YBL048W	0.6675	0.0345	0.351	0.4476	0.0305	0.0067
YBL049W	MOH1	1.0188	-0.1527	0.433	0.8283	0.0306	0.0066
YBL051C	PIN4	-0.1278	0.1274	-0.0002	0.1805	0.0305	0.007
YBL052C	SAS3	0.4839	-0.1054	0.1893	0.4168	0.0304	0.007
YBL053W	YBL053W	0.099	0.3841	0.2416	0.2016	0.0304	0.0064
YBL054W	YBL054W	0.2612	-0.3425	-0.0406	0.4268	0.0302	0.0067
YBL055C	YBL055C	-0.0023	0.414	0.2059	0.2944	0.0304	0.0072
YBL056W	PTC3	0.5156	0.3386	0.4271	0.1252	0.0296	0.0064
YBL057C	PTH2	0.079	-0.2276	-0.0743	0.2168	0.0299	0.0065
YBL058W	SHP1	0.2599	0.8849	0.5724	0.4419	0.0335	0.0078
YBL060W	YBL060W	1.208	-0.4829	0.3625	1.1957	0.03	0.0068
YBL061C	SKT5	0.3919	-0.1694	0.1113	0.3969	0.0314	0.007
YBL062W	YBL062W	0.7051	0.0567	0.3809	0.4585	0.0333	0.0069
YBL063W	KIP1	-0.1056	-0.2139	-0.1597	0.0766	0.0302	0.0067
YBL064C	PRX1	-0.6134	0.5261	-0.0437	0.8057	0.0303	0.0068
YBL065W	YBL065W	0.6117	0.7833	0.6975	0.1213	0.0304	0.0069
YBL066C	SEF1	0.5108	0.107	0.3089	0.2855	0.03	0.0068
YBL067C	UBP13	-0.0755	-0.0158	-0.0456	0.0422	0.03	0.007
YBL068W	PRS4	-0.8635	-0.4327	-0.6481	0.3046	0.0296	0.0068
YBL069W	AST1	-0.2045	-0.5733	-0.3889	0.2608	0.03	0.007
YBL070C	YBL070C	1.0861	-0.8823	0.1019	1.3919	0.0301	0.0068
YBL071C	YBL071C	0.4997	0.177	0.3383	0.2282	0.0305	0.007
YBL072C	RPS8A	-1.1615	-0.5266	-0.844	0.449	0.0293	0.0067
YBL075C	SSA3	0.4689	0.2306	0.3498	0.1685	0.0305	0.007
YBL078C	ATG8	-0.2457	0.0002	-0.1228	0.1738	0.0296	0.0069
YBL079W	NUP170	0.0138	-0.1565	-0.0714	0.1204	0.0297	0.0067
YBL080C	PET112	0.0229	0.5708	0.2969	0.3874	0.0317	0.0071
YBL081W	YBL081W	1.3067	0.4694	0.888	0.592	0.0323	0.0068
YBL082C	RHK1	0.5252	0.0462	0.2857	0.3387	0.0313	0.0069
YBL083C	YBL083C	0.5018	-0.6265	-0.0624	0.7978	0.0303	0.0071
YBL085W	BOI1	-0.0527	-0.6844	-0.3686	0.4467	0.0298	0.0067
YBL086C	YBL086C	0.2692	0.463	0.3661	0.137	0.0309	0.0069
YBL087C	RPL23A	0.1418	-0.0423	0.0498	0.1302	0.0295	0.0067
YBL088C	TEL1	0.0405	-0.1445	-0.052	0.1308	0.0306	0.0067
YBL089W	AVT5	0.0722	-0.1104	-0.0191	0.1291	0.0298	0.007
YBL090W	MRP21	0.8599	0.3275	0.5937	0.3764	0.032	0.0066
YBL091C	MAP2	-0.9219	-0.0114	-0.4666	0.6438	0.0295	0.0067
YBL091C-A	SCS22	0.0298	0.1875	0.1087	0.1116	0.0305	0.007
YBL094C	YBL094C	-0.4389	-0.7207	-0.5798	0.1993	0.0303	0.0091
YBL095W	YBL095W	-0.0339	1.0952	0.5307	0.7984	0.0301	0.0067
YBL096C	YBL096C	0.41	0.4234	0.4167	0.0095	0.0316	0.0067
YBL098W	BNA4	0.1003	0.033	0.0666	0.0475	0.03	0.0068
YBL099W	ATP1	2.6531	0.6123	1.6327	1.4431	0.0337	0.0065
YBL100C	YBL100C	0.2167	-0.1314	0.0426	0.2461	0.0301	0.0071
YBL102W	SFT2	0.002	-0.7397	-0.3689	0.5245	0.0296	0.0069
YBL103C	RTG3	1.4617	-0.0236	0.719	1.0503	0.0302	0.0071
YBL104C	YBL104C	0.3955	0.6174	0.5065	0.1569	0.03	0.0065
YBL106C	SRO77	0.4815	0.2727	0.3771	0.1477	0.0305	0.0066
YBL107C	YBL107C	-0.2541	-0.0507	-0.1524	0.1438	0.03	0.007
YBR001C	NTH2	-0.0953	0.0219	-0.0367	0.0829	0.0296	0.0067
YBR003W	COQ1	0.5448	0.3583	0.4515	0.1319	0.0307	0.007
YBR006W	UGA2	-0.0231	-0.2894	-0.1563	0.1883	0.0301	0.007
YBR007C	YBR007C	0.1148	-0.2695	-0.0774	0.2717	0.0303	0.0069
YBR008C	FLR1	0.7821	-0.5596	0.1113	0.9488	0.0295	0.0066
YBR009C	HHF1	0.3414	0.1636	0.2525	0.1258	0.0311	0.0072
YBR010W	HHT1	0.2385	0.2907	0.2646	0.0369	0.0303	0.0069
YBR013C	YBR013C	-0.4002	0.5132	0.0565	0.6458	0.0308	0.0068
YBR014C	YBR014C	0.8082	-0.5183	0.1449	0.938	0.0302	0.0067
YBR015C	MNN2	0.4718	-0.0941	0.1888	0.4001	0.0309	0.0069
YBR016W	YBR016W	-0.2511	-0.1064	-0.1788	0.1023	0.0299	0.0069
YBR018C	GAL7	0.4713	-0.209	0.1312	0.481	0.0298	0.0066
YBR019C	GAL10	1.1011	-0.1082	0.4964	0.8551	0.0304	0.0067
YBR020W	GAL1	-0.1779	1.0587	0.4404	0.8744	0.0297	0.0066
YBR020W	GAL1	-0.3144	-0.1296	-0.222	0.1307	0.03	0.0069
YBR021W	FUR4	0.6428	0.676	0.6594	0.0235	0.0316	0.0071
YBR022W	YBR022W	-0.3922	0.2306	-0.0808	0.4404	0.0297	0.0067
YBR023C	CHS3	-0.4656	-0.2452	-0.3554	0.1558	0.0305	0.0072
YBR024W	SCO2	0.2808	0.3829	0.3318	0.0722	0.0308	0.0069
YBR025C	YBR025C	0.408	0.072	0.24	0.2376	0.0306	0.007
YBR027C	YBR027C	-0.3538	0.03	-0.1619	0.2714	0.0296	0.0067
YBR028C	YBR028C	-0.2268	-1.1418	-0.6843	0.647	0.0297	0.0069
YBR030W	YBR030W	0.4196	0.1559	0.2877	0.1865	0.0307	0.0071
YBR031W	RPL4A	1.2292	0.5542	0.8917	0.4773	0.0305	0.0074
YBR032W	YBR032W	0.2434	0.2141	0.2288	0.0207	0.0309	0.0071
YBR033W	EDS1	-0.0672	0.2033	0.0681	0.1912	0.03	0.0068
YBR034C	HMT1	0.1897	-0.1917	-0.001	0.2696	0.0298	0.007
YBR036C	CSG2	0.1676	0.2064	0.187	0.0274	0.0304	0.0071
YBR037C	SCO1	0.1368	1.2007	0.6687	0.7523	0.032	0.0067
YBR040W	FIG1	0.1297	0.3863	0.258	0.1815	0.0317	0.0071
YBR041W	FAT1	1.1342	-0.8079	0.1631	1.3733	0.0298	0.0067
YBR042C	YBR042C	0.8511	0.022	0.4366	0.5862	0.0304	0.0067
YBR043C	YBR043C	0.5353	0.0382	0.2868	0.3515	0.0305	0.0069
YBR044C	TCM62	-0.4377	-0.2231	-0.3304	0.1517	0.0289	0.0063
YBR045C	GIP1	-0.1763	-0.0566	-0.1165	0.0847	0.0301	0.007
YBR046C	ZTA1	-0.0611	-0.099	-0.08	0.0268	0.0303	0.0069
YBR047W	FMP23	0.4859	0.2691	0.3775	0.1533	0.0309	0.0069
YBR048W	RPS11B	0.5511	1.483	1.017	0.659	0.0337	0.0073
YBR050C	REG2	1.2055	0.3548	0.7801	0.6015	0.0307	0.0069
YBR051W	YBR051W	0.2562	0.4244	0.3403	0.119	0.0306	0.0069
YBR052C	YBR052C	0.0878	1.0868	0.5873	0.7064	0.0304	0.0069
YBR053C	YBR053C	0.0918	-0.2932	-0.1007	0.2722	0.0298	0.0066
YBR054W	YRO2	-0.2473	-0.2623	-0.2548	0.0106	0.0299	0.0068
YBR056W	YBR056W	0.2623	0.053	0.1577	0.1479	0.0299	0.0068
YBR057C	MUM2	0.8902	-0.0877	0.4012	0.6915	0.0314	0.0071
YBR058C	UBP14	0.7441	0.5785	0.6613	0.117	0.0298	0.0064
YBR059C	AKL1	0.1544	-0.2808	-0.0632	0.3078	0.0298	0.0068
YBR061C	TRM7	0.0228	-0.7139	-0.3456	0.5209	0.0292	0.0066
YBR062C	YBR062C	-0.2832	0.3183	0.0175	0.4254	0.0301	0.007
YBR063C	YBR063C	0.1232	-0.8388	-0.3578	0.6802	0.0302	0.0065
YBR064W	YBR064W	-0.9087	0.0095	-0.4496	0.6492	0.0297	0.0066
YBR065C	ECM2	-0.0833	0.5772	0.247	0.467	0.0302	0.0066
YBR066C	NRG2	0.4077	-0.1349	0.1364	0.3837	0.0305	0.0069
YBR067C	TIP1	-0.5559	0.0007	-0.2776	0.3936	0.0299	0.0069
YBR068C	BAP2	-0.1296	-0.4498	-0.2897	0.2264	0.0297	0.0068
YBR069C	TAT1	-0.0841	-0.3396	-0.2119	0.1807	0.0292	0.0068
YBR071W	YBR071W	0.5261	1.3077	0.9169	0.5527	0.0308	0.0071
YBR072W	HSP26	0.3772	-0.6765	-0.1496	0.745	0.0298	0.0067
YBR073W	RDH54	0.1755	-0.0074	0.084	0.1293	0.0303	0.0072
YBR074W	YBR074W	-0.738	0.3301	-0.204	0.7552	0.0295	0.0067
YBR075W	YBR075W	0.8641	0.2032	0.5336	0.4673	0.0304	0.0072
YBR076W	ECM8	0.3095	0.695	0.5022	0.2726	0.03	0.0064
YBR077C	YBR077C	-0.5772	-0.43	-0.5036	0.1041	0.029	0.0065
YBR081C	SPT7	-0.2155	-0.6137	-0.4146	0.2816	0.0322	0.0083
YBR082C	UBC4	1.1946	0.2813	0.738	0.6458	0.0305	0.007
YBR083W	TEC1	-0.5579	0.458	-0.0499	0.7184	0.0302	0.0068
YBR084C-A	RPL19A	-0.0289	0.347	0.1591	0.2658	0.0307	0.0071
YBR084W	MIS1	0.0355	0.0264	0.031	0.0065	0.0305	0.0069
YBR085W	AAC3	1.3022	0.4793	0.8908	0.5819	0.0313	0.0069
YBR090C	YBR090C	0.5637	-0.199	0.1824	0.5394	0.0302	0.0066
YBR090C-A	YBR090C-A	-0.0714	1.0766	0.5026	0.8118	0.0305	0.0068
YBR092C	PHO3	-0.7136	-0.2248	-0.4692	0.3456	0.0303	0.0069
YBR095C	RXT2	0.5552	-0.4299	0.0627	0.6965	0.0305	0.0069
YBR098W	MMS4	0.3073	0.2057	0.2565	0.0718	0.0309	0.0074
YBR099C	YBR099C	0.1095	0.0391	0.0743	0.0498	0.0307	0.007
YBR100W	YBR100W	-0.4913	-0.0514	-0.2714	0.3111	0.0302	0.0072
YBR103W	SIF2	0.0601	-0.2867	-0.1133	0.2452	0.0303	0.0069
YBR104W	YMC2	1.4564	-0.1961	0.6301	1.1685	0.031	0.0066
YBR105C	VID24	1.3458	-0.1525	0.5966	1.0594	0.0303	0.007
YBR106W	PHO88	0.5462	0.0506	0.2984	0.3504	0.0319	0.0069
YBR107C	IML3	-0.0522	-0.0344	-0.0433	0.0126	0.0308	0.0069
YBR108W	YBR108W	0.3738	0.0696	0.2217	0.2151	0.0302	0.007
YBR111C	YSA1	1.8435	0.4928	1.1682	0.9551	0.032	0.0072
YBR113W	YBR113W	-0.3978	-0.3452	-0.3715	0.0372	0.0304	0.0073
YBR114W	RAD16	0.4911	0.7896	0.6403	0.211	0.0318	0.0071
YBR115C	LYS2	-0.7742	-0.4159	-0.595	0.2533	0.0298	0.0068
YBR116C	YBR116C	0.3531	0.7235	0.5383	0.2619	0.0305	0.0067
YBR119W	MUD1	-0.4654	0.3255	-0.07	0.5593	0.0302	0.007
YBR120C	CBP6	0.4262	-0.0467	0.1898	0.3344	0.0312	0.0064
YBR125C	PTC4	1.2386	0.7411	0.9898	0.3518	0.0319	0.0068
YBR126C	TPS1	0.8501	2.2342	1.5422	0.9787	0.0321	0.0073
YBR128C	ATG14	-0.5572	0.3429	-0.1071	0.6364	0.0299	0.0068
YBR129C	OPY1	1.7258	0.0894	0.9076	1.1571	0.0307	0.0068
YBR130C	SHE3	0.7218	0.5509	0.6363	0.1208	0.0308	0.0068
YBR131W	CCZ1	0.1794	0.0042	0.0918	0.1238	0.0304	0.0071
YBR132C	AGP2	0.2293	0.478	0.3536	0.1758	0.0308	0.0071
YBR133C	HSL7	1.0655	0.1088	0.5872	0.6765	0.0318	0.0071
YBR134W	YBR134W	0.9726	1.2501	1.1113	0.1962	0.0331	0.0077
YBR137W	YBR137W	0.0612	0.248	0.1546	0.1321	0.0326	0.0076
YBR138C	YBR138C	0.1163	-0.7153	-0.2995	0.588	0.0301	0.0066
YBR139W	YBR139W	-0.8797	-0.7106	-0.7951	0.1196	0.0299	0.0067
YBR141C	YBR141C	-0.3007	-0.069	-0.1849	0.1639	0.0301	0.007
YBR144C	YBR144C	-0.0087	0.6684	0.3299	0.4788	0.0303	0.0076
YBR145W	ADH5	1.0507	-0.1143	0.4682	0.8238	0.0298	0.0066
YBR146W	MRPS9	2.3408	1.0921	1.7165	0.883	0.0331	0.0068
YBR147W	YBR147W	0.3831	-0.2394	0.0719	0.4402	0.0303	0.0069
YBR148W	YSW1	0.5968	0.1829	0.3898	0.2927	0.0309	0.007
YBR149W	ARA1	0.1831	0.3571	0.2701	0.1231	0.0307	0.007
YBR150C	TBS1	0.1824	0.4209	0.3016	0.1686	0.0305	0.0069
YBR151W	APD1	-0.1633	-0.0256	-0.0944	0.0974	0.0293	0.0068
YBR156C	SLI15	0.1544	0.413	0.2837	0.1828	0.0305	0.0068
YBR157C	ICS2	-0.253	0.4764	0.1117	0.5158	0.0301	0.0069
YBR161W	YBR161W	-0.3479	-0.3919	-0.3699	0.0311	0.0296	0.0068
YBR162C	TOS1	0.4999	0.2306	0.3653	0.1904	0.0309	0.0069
YBR162W-A	YSY6	0.7247	-0.0366	0.344	0.5383	0.0304	0.0069
YBR165W	UBS1	-0.0221	0.0528	0.0153	0.053	0.0305	0.007
YBR166C	TYR1	1.2782	-0.5653	0.3565	1.3035	0.031	0.0065
YBR168W	YBR168W	0.5949	0.3821	0.4885	0.1504	0.0302	0.0067
YBR169C	SSE2	0.1596	-0.1358	0.0119	0.2089	0.0306	0.007
YBR170C	NPL4	0.0433	-0.0251	0.0091	0.0484	0.0305	0.007
YBR171W	SEC66	0.0497	0.127	0.0883	0.0546	0.0303	0.007
YBR172C	SMY2	0.4381	0.0237	0.2309	0.293	0.0307	0.007
YBR173C	UMP1	0.7672	0.9847	0.8759	0.1539	0.0312	0.0071
YBR174C	YBR174C	0.703	0.9268	0.8149	0.1582	0.0327	0.007
YBR175W	SWD3	-0.2384	-0.0205	-0.1295	0.1541	0.0288	0.0069
YBR176W	ECM31	0.6069	0.4878	0.5473	0.0842	0.031	0.0072
YBR177C	EHT1	0.2577	0.8654	0.5615	0.4297	0.0303	0.0068
YBR179C	FZO1	0.4172	0.7816	0.5994	0.2577	0.0299	0.0071
YBR180W	DTR1	-0.221	0.0433	-0.0888	0.1869	0.0302	0.0068
YBR181C	RPS6B	0.4504	1.2521	0.8513	0.5668	0.0309	0.0069
YBR183W	YPC1	0.542	0.3879	0.4649	0.1089	0.0303	0.0069
YBR184W	YBR184W	0.4835	0.3464	0.4149	0.097	0.0306	0.007
YBR185C	MBA1	-0.2594	-0.2328	-0.2461	0.0188	0.0301	0.0064
YBR186W	PCH2	1.3042	-0.2336	0.5353	1.0874	0.0304	0.0071
YBR187W	YBR187W	0.1933	0.2237	0.2085	0.0215	0.0305	0.0071
YBR188C	NTC20	0.8737	0.7186	0.7961	0.1097	0.0308	0.0071
YBR189W	RPS9B	-0.1685	-0.4679	-0.3182	0.2117	0.0296	0.0069
YBR191W	RPL21A	-0.2402	-0.3222	-0.2812	0.058	0.0298	0.0068
YBR194W	SOY1	-0.1439	-0.0356	-0.0898	0.0766	0.0302	0.0074
YBR195C	MSI1	1.2456	0.3551	0.8004	0.6296	0.0306	0.007
YBR197C	YBR197C	-0.0096	0.5571	0.2737	0.4007	0.0305	0.0069
YBR199W	KTR4	0.8604	-0.2459	0.3073	0.7823	0.0306	0.0069
YBR200W	BEM1	-0.8228	0.7104	-0.0562	1.0841	0.0298	0.0083
YBR201W	DER1	0.0311	1.1712	0.6011	0.8062	0.0306	0.0073
YBR203W	COS111	0.7377	1.0281	0.8829	0.2054	0.0315	0.0071
YBR204C	YBR204C	1.2835	0.8103	1.0469	0.3346	0.0308	0.0069
YBR205W	KTR3	-0.3193	-0.7903	-0.5548	0.3331	0.03	0.0071
YBR206W	YBR206W	1.5115	-0.5217	0.4949	1.4377	0.0295	0.0069
YBR207W	FTH1	0.7736	0.0237	0.3986	0.5302	0.0308	0.0071
YBR208C	DUR1,2	0.5784	0.2743	0.4264	0.215	0.0304	0.0068
YBR209W	YBR209W	1.0311	0.0378	0.5344	0.7024	0.0301	0.0069
YBR210W	ERV15	0.0894	-0.0288	0.0303	0.0836	0.0295	0.0066
YBR212W	NGR1	0.1267	0.3723	0.2495	0.1737	0.0314	0.0073
YBR213W	MET8	0.3019	0.2151	0.2585	0.0613	0.0312	0.007
YBR214W	SDS24	0.3861	0.4003	0.3932	0.01	0.0335	0.0069
YBR215W	HPC2	0.1316	-0.6525	-0.2605	0.5545	0.029	0.0063
YBR216C	YBP1	0.4689	0.2725	0.3707	0.1389	0.0305	0.007
YBR217W	ATG12	-0.4902	1.1399	0.3248	1.1527	0.0303	0.0073
YBR218C	PYC2	1.1518	0.9206	1.0362	0.1635	0.0309	0.0067
YBR219C	YBR219C	0.4355	0.1771	0.3063	0.1827	0.0306	0.007
YBR220C	YBR220C	0.3882	-0.0714	0.1584	0.325	0.0309	0.0075
YBR222C	PCS60	0.0304	-0.2826	-0.1261	0.2213	0.0301	0.0069
YBR223C	TDP1	0.481	0.0638	0.2724	0.295	0.031	0.0072
YBR224W	YBR224W	-0.1187	-0.1775	-0.1481	0.0416	0.0301	0.0066
YBR225W	YBR225W	-0.0948	1.1465	0.5258	0.8777	0.0297	0.0068
YBR226C	YBR226C	1.1663	0.5885	0.8774	0.4086	0.0301	0.0069
YBR227C	MCX1	1.3862	0.1109	0.7485	0.9018	0.031	0.0074
YBR228W	SLX1	0.3046	0.6303	0.4675	0.2303	0.0314	0.0072
YBR229C	ROT2	1.1699	0.1308	0.6504	0.7348	0.0309	0.0075
YBR230C	YBR230C	0.4355	0.2325	0.334	0.1436	0.0305	0.007
YBR231C	AOR1	1.159	0.1217	0.6403	0.7334	0.0317	0.0072
YBR232C	YBR232C	0.5863	0.7742	0.6803	0.1329	0.0313	0.0069
YBR233W	PBP2	0.3464	-0.4031	-0.0284	0.53	0.0301	0.007
YBR235W	YBR235W	-0.0395	-0.6455	-0.3425	0.4285	0.0297	0.0068
YBR238C	YBR238C	-0.2946	-1.1989	-0.7467	0.6394	0.0299	0.0067
YBR239C	YBR239C	-0.4301	-0.8499	-0.64	0.2969	0.0298	0.0071
YBR240C	THI2	1.2925	0.1204	0.7065	0.8288	0.0307	0.0071
YBR241C	YBR241C	0.0791	-0.2182	-0.0696	0.2102	0.0308	0.0074
YBR242W	YBR242W	0.8557	0.0548	0.4552	0.5664	0.0306	0.0069
YBR244W	GPX2	0.8942	0.5775	0.7358	0.2239	0.0308	0.0071
YBR245C	ISW1	1.1384	0.7663	0.9524	0.2631	0.0306	0.007
YBR246W	YBR246W	0.5427	1.0145	0.7786	0.3336	0.0302	0.0067
YBR248C	HIS7	0.4203	1.0026	0.7115	0.4118	0.0313	0.0072
YBR250W	YBR250W	0.8077	0.0047	0.4062	0.5678	0.0301	0.0073
YBR255W	YBR255W	-0.4849	0.9733	0.2442	1.0311	0.0299	0.007
YBR258C	SHG1	0.2487	0.6695	0.4591	0.2975	0.0306	0.0069
YBR259W	YBR259W	0.0371	0.5331	0.2851	0.3507	0.0301	0.0066
YBR260C	RGD1	0.6592	-0.3979	0.1307	0.7475	0.0306	0.0073
YBR261C	YBR261C	0.3607	0.9209	0.6408	0.3961	0.0308	0.0068
YBR262C	FMP51	-0.2064	0.2949	0.0443	0.3545	0.0309	0.0073
YBR263W	SHM1	-0.7181	1.1671	0.2245	1.333	0.0301	0.007
YBR264C	YPT10	0.285	-0.4142	-0.0646	0.4944	0.0303	0.007
YBR266C	YBR266C	1.61	-0.244	0.683	1.311	0.0299	0.0073
YBR267W	YBR267W	0.8344	0.0164	0.4254	0.5784	0.0297	0.0071
YBR268W	MRPL37	1.1303	0.8801	1.0052	0.1769	0.0312	0.0074
YBR269C	FMP21	-0.7486	-0.1889	-0.4687	0.3958	0.0298	0.0071
YBR270C	YBR270C	-0.2999	-0.0066	-0.1533	0.2074	0.0298	0.0071
YBR271W	YBR271W	0.3395	0.1743	0.2569	0.1169	0.0303	0.0069
YBR272C	HSM3	0.1201	0.0377	0.0789	0.0583	0.0304	0.0072
YBR274W	CHK1	0.4353	0.1791	0.3072	0.1812	0.0305	0.007
YBR275C	RIF1	0.2001	0.3835	0.2918	0.1297	0.0308	0.0071
YBR276C	PPS1	0.3742	0.1078	0.241	0.1883	0.0304	0.007
YBR277C	YBR277C	0.1601	0.4875	0.3238	0.2315	0.0309	0.0066
YBR278W	DPB3	0.3117	0.0117	0.1617	0.2121	0.0291	0.0066
YBR281C	YBR281C	-0.1601	-0.0609	-0.1105	0.0701	0.0302	0.0069
YBR282W	MRPL27	0.4689	0.179	0.324	0.205	0.0318	0.0071
YBR283C	SSH1	0.3914	0.3568	0.3741	0.0244	0.0313	0.007
YBR284W	YBR284W	0.3373	0.3232	0.3303	0.01	0.0304	0.0069
YBR285W	YBR285W	0.4303	-0.2835	0.0734	0.5047	0.0303	0.0067
YBR286W	APE3	-0.3859	-0.6004	-0.4931	0.1517	0.0305	0.0073
YBR287W	YBR287W	-0.5098	0.2335	-0.1382	0.5256	0.0299	0.0068
YBR288C	APM3	-0.3914	-0.2007	-0.2961	0.1349	0.0302	0.0071
YBR290W	BSD2	0.6723	0.0411	0.3567	0.4463	0.03	0.0066
YBR291C	CTP1	-0.0689	0.0285	-0.0202	0.0689	0.0308	0.0071
YBR292C	YBR292C	-0.3687	-0.2161	-0.2924	0.1078	0.0301	0.0071
YBR293W	YBR293W	0.802	0.061	0.4315	0.524	0.0306	0.0066
YBR294W	SUL1	0.5542	0.5834	0.5688	0.0206	0.0308	0.0067
YBR295W	PCA1	-0.3937	-0.3864	-0.39	0.0052	0.03	0.0068
YBR296C	PHO89	0.5026	0.177	0.3398	0.2302	0.0305	0.007
YBR297W	MAL33	0.1976	-0.1207	0.0385	0.2251	0.0303	0.0071
YBR298C	MAL31	-0.775	-0.2257	-0.5004	0.3884	0.0312	0.007
YBR299W	MAL32	-0.2652	0.424	0.0794	0.4873	0.0302	0.0067
YBR300C	YBR300C	0.1731	-0.1091	0.032	0.1995	0.0301	0.0071
YBR301W	DAN3	-0.6787	-0.4074	-0.543	0.1918	0.0293	0.0065
YCL001W	RER1	0.8369	0.6414	0.7392	0.1383	0.0312	0.007
YCL001W-A	YCL001W-A	0.4355	0.1808	0.3082	0.1801	0.0305	0.007
YCL002C	YCL002C	0.3272	-0.1955	0.0659	0.3696	0.0303	0.0069
YCL005W	YCL005W	0.0009	0.4288	0.2148	0.3026	0.0324	0.0073
YCL006C	YCL006C	0.3228	1.0766	0.6997	0.533	0.0315	0.0069
YCL008C	STP22	2.6547	1.3489	2.0018	0.9233	0.0341	0.0069
YCL009C	ILV6	0.4155	0.2369	0.3262	0.1263	0.0305	0.0069
YCL010C	SGF29	-0.0617	0.0911	0.0147	0.108	0.031	0.0074
YCL011C	GBP2	0.7794	0.4924	0.6359	0.2029	0.0326	0.0076
YCL012W	YCL012W	0.1883	-0.6839	-0.2478	0.6168	0.03	0.007
YCL013W	YCL013W	0.0141	-0.1043	-0.0451	0.0837	0.0311	0.0072
YCL014W	BUD3	-0.9815	-0.1851	-0.5833	0.5631	0.0296	0.0077
YCL016C	DCC1	-0.5953	0.4	-0.0977	0.7038	0.0302	0.0072
YCL022C	YCL022C	0.032	0.6691	0.3506	0.4505	0.0311	0.0069
YCL023C	YCL023C	0.7362	0.8203	0.7782	0.0595	0.0309	0.007
YCL024W	KCC4	0.1211	0.2512	0.1862	0.092	0.0305	0.0066
YCL025C	AGP1	0.2549	0.04	0.1474	0.152	0.0304	0.007
YCL026C	YCL026C	0.3951	0.5385	0.4668	0.1014	0.0313	0.0071
YCL026C-A	FRM2	0.5988	0.1102	0.3545	0.3455	0.0315	0.0072
YCL027W	FUS1	0.2723	-0.1422	0.0651	0.2931	0.0305	0.0069
YCL028W	RNQ1	0.5169	-0.1313	0.1928	0.4583	0.0306	0.0072
YCL029C	BIK1	0.4713	-0.2349	0.1182	0.4994	0.0306	0.0075
YCL030C	HIS4	0.1111	0.2141	0.1626	0.0728	0.0309	0.0072
YCL032W	STE50	0.4355	0.1771	0.3063	0.1827	0.0305	0.007
YCL033C	YCL033C	0.5823	0.3996	0.491	0.1292	0.0312	0.0072
YCL034W	LSB5	0.4689	0.1771	0.323	0.2063	0.0305	0.007
YCL035C	GRX1	-0.5695	-0.1193	-0.3444	0.3183	0.0303	0.0068
YCL036W	GFD2	0.2338	1.2304	0.7321	0.7047	0.0319	0.0074
YCL037C	SRO9	0.6734	0.0392	0.3563	0.4484	0.0321	0.0069
YCL038C	ATG22	0.2613	-0.0754	0.093	0.2381	0.0302	0.0068
YCL039W	GID7	-0.0331	-0.0275	-0.0303	0.0039	0.0304	0.007
YCL040W	GLK1	0.0731	-0.0696	0.0018	0.1009	0.0303	0.0069
YCL042W	YCL042W	-0.1425	-0.413	-0.2777	0.1913	0.03	0.007
YCL044C	YCL044C	0.4689	0.177	0.323	0.2065	0.0305	0.007
YCL045C	YCL045C	0.1793	-0.1762	0.0016	0.2514	0.0298	0.0066
YCL046W	YCL046W	-0.0261	0.0078	-0.0092	0.0239	0.0292	0.0066
YCL047C	YCL047C	0.3516	-0.13	0.1108	0.3405	0.0303	0.0069
YCL048W	YCL048W	0.0578	-0.9342	-0.4382	0.7015	0.0302	0.0071
YCL049C	YCL049C	0.1434	-0.1002	0.0216	0.1722	0.0304	0.0068
YCL050C	APA1	0.3858	0.2498	0.3178	0.0962	0.0313	0.0073
YCL051W	LRE1	0.4973	0.2568	0.377	0.1701	0.0305	0.007
YCL055W	KAR4	-0.0422	0.3446	0.1512	0.2735	0.0314	0.0071
YCL056C	YCL056C	0.5831	0.0725	0.3278	0.361	0.0309	0.0072
YCL057W	PRD1	0.2456	0.0657	0.1557	0.1272	0.0308	0.0071
YCL058C	FYV5	0.2521	-0.1901	0.031	0.3127	0.03	0.0069
YCL060C	YCL060C	0.7678	-0.1174	0.3252	0.6259	0.0312	0.0073
YCL061C	MRC1	-0.7313	-0.4541	-0.5927	0.196	0.0305	0.0072
YCL062W	YCL062W	-0.8452	-0.7653	-0.8053	0.0565	0.029	0.0073
YCL063W	VAC17	-0.0238	-0.0031	-0.0135	0.0146	0.0304	0.0073
YCL064C	CHA1	0.4689	0.2325	0.3507	0.1672	0.0305	0.007
YCL069W	YCL069W	-0.165	-0.3176	-0.2413	0.1079	0.0299	0.0068
YCL074W	YCL074W	0.4353	0.2306	0.333	0.1447	0.0305	0.007
YCL075W	YCL075W	0.4385	-0.1224	0.1581	0.3967	0.0304	0.0068
YCL076W	YCL076W	0.4353	0.2582	0.3467	0.1252	0.0305	0.007
YCR001W	YCR001W	0.0203	-0.1754	-0.0775	0.1384	0.0304	0.0073
YCR002C	CDC10	0.2558	0.6287	0.4423	0.2637	0.0347	0.0069
YCR003W	MRPL32	1.7091	1.0935	1.4013	0.4353	0.0317	0.0071
YCR004C	YCP4	0.8409	0.649	0.7449	0.1357	0.0317	0.007
YCR005C	CIT2	-0.429	0.0663	-0.1814	0.3503	0.0307	0.007
YCR006C	YCR006C	0.3327	0.158	0.2454	0.1235	0.0314	0.0068
YCR007C	YCR007C	0.2539	1.2819	0.7679	0.7269	0.0301	0.0068
YCR008W	SAT4	-0.6786	0.7959	0.0587	1.0426	0.0302	0.0068
YCR009C	RVS161	2.3555	0.5741	1.4648	1.2597	0.0329	0.0075
YCR010C	ADY2	0.5885	0.0011	0.2948	0.4154	0.0296	0.0067
YCR011C	ADP1	0.371	-0.2032	0.0839	0.406	0.0302	0.0071
YCR014C	POL4	0.202	-0.1249	0.0385	0.2312	0.0307	0.0071
YCR015C	YCR015C	0.0802	-0.2711	-0.0954	0.2484	0.03	0.0072
YCR016W	YCR016W	1.0888	1.4377	1.2632	0.2467	0.03	0.0068
YCR017C	CWH43	-0.4302	-0.3917	-0.4109	0.0272	0.03	0.0071
YCR019W	MAK32	0.1628	0.2273	0.1951	0.0456	0.0316	0.0074
YCR020C	PET18	0.1892	-0.1225	0.0333	0.2204	0.0303	0.007
YCR020C-A	MAK31	-0.0237	0.2006	0.0885	0.1586	0.0302	0.0069
YCR020W-B	HTL1	0.5173	-0.2733	0.122	0.559	0.0332	0.0069
YCR021C	HSP30	-0.3287	1.1708	0.421	1.0603	0.0302	0.0065
YCR022C	YCR022C	0.0279	0.1899	0.1089	0.1145	0.0304	0.007
YCR023C	YCR023C	0.2163	0.1455	0.1809	0.0501	0.0303	0.0068
YCR024C-A	PMP1	0.0951	0.053	0.0741	0.0297	0.0294	0.0068
YCR025C	YCR025C	-0.2031	0.3709	0.0839	0.4058	0.0303	0.0067
YCR026C	YCR026C	0.0954	0.1073	0.1014	0.0084	0.0304	0.0067
YCR027C	RHB1	0.2503	-0.7932	-0.2714	0.7379	0.0303	0.0068
YCR028C	FEN2	0.8792	-0.2218	0.3287	0.7785	0.0299	0.0065
YCR028C-A	RIM1	1.0446	-0.2011	0.4217	0.8809	0.0305	0.0072
YCR030C	SYP1	0.222	-0.2103	0.0058	0.3057	0.0305	0.007
YCR031C	RPS14A	-0.0405	0.3355	0.1475	0.2659	0.0308	0.007
YCR032W	BPH1	0.8689	0.0319	0.4504	0.5919	0.0302	0.0068
YCR033W	SNT1	0.1785	-0.6064	-0.214	0.555	0.0307	0.0069
YCR034W	FEN1	2.5296	0.2133	1.3715	1.6379	0.0322	0.0068
YCR036W	RBK1	0.5226	-0.6507	-0.064	0.8296	0.0299	0.0065
YCR037C	PHO87	0.855	0.585	0.72	0.1909	0.0318	0.007
YCR043C	YCR043C	-0.1243	0.0241	-0.0501	0.105	0.0309	0.0069
YCR045C	YCR045C	-0.3239	-0.1401	-0.232	0.13	0.0295	0.0067
YCR046C	IMG1	0.583	-0.3966	0.0932	0.6927	0.0324	0.0077
YCR048W	ARE1	0.0154	-0.0222	-0.0034	0.0266	0.0307	0.0069
YCR049C	YCR049C	-0.8394	-0.0022	-0.4208	0.5919	0.0296	0.0068
YCR050C	YCR050C	-0.0302	0.023	-0.0036	0.0376	0.0301	0.0063
YCR051W	YCR051W	-0.2502	0.0967	-0.0768	0.2453	0.0299	0.007
YCR053W	THR4	-0.3294	-0.0814	-0.2054	0.1753	0.03	0.0068
YCR059C	YIH1	-0.0967	-0.6139	-0.3553	0.3657	0.0301	0.0069
YCR060W	YCR060W	-0.0952	-0.3111	-0.2032	0.1526	0.0301	0.0068
YCR061W	YCR061W	-0.4362	0.1458	-0.1452	0.4116	0.03	0.007
YCR062W	YCR062W	0.2281	-0.0867	0.0707	0.2226	0.0311	0.0075
YCR065W	HCM1	-0.032	0.3319	0.1499	0.2574	0.0312	0.0074
YCR066W	RAD18	1.4898	0.1777	0.8337	0.9278	0.0315	0.007
YCR067C	SED4	0.5675	0.0513	0.3094	0.365	0.0308	0.0069
YCR068W	ATG15	-1.4015	0.1181	-0.6417	1.0746	0.0303	0.0069
YCR069W	CPR4	-0.417	1.6089	0.5959	1.4325	0.0311	0.007
YCR071C	IMG2	1.4006	0.2065	0.8035	0.8444	0.0319	0.0072
YCR073C	SSK22	0.4013	0.3306	0.3659	0.05	0.0304	0.0068
YCR073W-A	SOL2	-0.0364	0.2684	0.116	0.2155	0.0307	0.0069
YCR075C	ERS1	-0.2644	0.1073	-0.0785	0.2629	0.0301	0.0068
YCR076C	YCR076C	0.7327	0.4405	0.5866	0.2066	0.03	0.0067
YCR077C	PAT1	0.4812	0.2452	0.3632	0.1668	0.0321	0.0072
YCR079W	YCR079W	1.572	0.3391	0.9556	0.8718	0.0312	0.0071
YCR084C	TUP1	-4.3043	-3.4391	-3.8717	0.6118	0.0176	0.0068
YCR085W	YCR085W	1.7795	0.0496	0.9145	1.2233	0.0304	0.0066
YCR086W	CSM1	0.1639	-0.0437	0.0601	0.1468	0.0307	0.0072
YCR087C-A	YCR087C-A	0.4745	0.0088	0.2416	0.3293	0.0308	0.0069
YCR087W	YCR087W	0.9365	0.4757	0.7061	0.3259	0.0297	0.0069
YCR088W	ABP1	-0.1768	-0.229	-0.2029	0.0369	0.0302	0.0068
YCR089W	FIG2	0.0674	-0.1168	-0.0247	0.1303	0.0303	0.007
YCR090C	YCR090C	0.8356	0.1182	0.4769	0.5073	0.0306	0.0068
YCR092C	MSH3	-0.0619	-0.2563	-0.1591	0.1374	0.0304	0.0071
YCR094W	CDC50	1.581	1.1225	1.3518	0.3243	0.0328	0.0072
YCR095C	YCR095C	0.535	0.1947	0.3648	0.2406	0.031	0.007
YCR098C	GIT1	-0.2675	-0.3613	-0.3144	0.0663	0.0302	0.0069
YCR099C	YCR099C	0.2113	-0.0865	0.0624	0.2106	0.03	0.0069
YCR100C	YCR100C	0.167	0.1064	0.1367	0.0428	0.0305	0.0069
YCR101C	YCR101C	0.3499	0.2843	0.3171	0.0464	0.0305	0.007
YCR102C	YCR102C	0.4689	0.177	0.323	0.2065	0.0313	0.0072
YCR102W-A	YCR102W-A	-0.3307	-0.8302	-0.5805	0.3532	0.0298	0.007
YCR105W	ADH7	0.0799	0.1283	0.1041	0.0342	0.0298	0.0066
YCR106W	RDS1	-0.5762	-0.2191	-0.3976	0.2525	0.0301	0.007
YCR107W	AAD3	0.0657	0.3422	0.204	0.1955	0.0305	0.0068
YDL001W	RMD1	-0.0004	-0.1784	-0.0894	0.1258	0.0301	0.0069
YDL002C	NHP10	-0.4517	-0.4212	-0.4364	0.0216	0.0298	0.0069
YDL006W	PTC1	-1.2728	-0.4366	-0.8547	0.5913	0.0285	0.0067
YDL009C	YDL009C	0.8235	0.4809	0.6522	0.2422	0.0316	0.0069
YDL010W	YDL010W	0.6308	0.2457	0.4383	0.2723	0.0309	0.007
YDL011C	YDL011C	1.1683	0.3175	0.7429	0.6016	0.0305	0.007
YDL012C	YDL012C	0.1294	-0.0441	0.0426	0.1227	0.0305	0.0068
YDL013W	HEX3	0.5578	-0.0333	0.2622	0.418	0.0317	0.0076
YDL018C	ERP3	-0.3486	-0.1524	-0.2505	0.1387	0.0302	0.0069
YDL019C	OSH2	0.4353	0.2048	0.3201	0.163	0.0305	0.007
YDL020C	RPN4	1.7888	-0.4929	0.648	1.6134	0.0311	0.0071
YDL021W	GPM2	0.4107	-0.0078	0.2015	0.296	0.0327	0.0075
YDL022W	GPD1	-0.1786	-0.349	-0.2638	0.1205	0.0299	0.0067
YDL023C	SRF4	0.0582	0.5803	0.3192	0.3692	0.0306	0.0071
YDL024C	DIA3	0.2578	0.0376	0.1477	0.1557	0.0307	0.007
YDL025C	YDL025C	-0.089	-0.2155	-0.1522	0.0894	0.0306	0.007
YDL026W	YDL026W	-1.1354	0.4729	-0.3313	1.1372	0.0304	0.0069
YDL027C	YDL027C	-0.247	-0.3492	-0.2981	0.0722	0.0298	0.0069
YDL032W	YDL032W	-0.1381	-0.3823	-0.2602	0.1726	0.0295	0.0067
YDL033C	YDL033C	0.227	-0.2435	-0.0083	0.3327	0.0306	0.007
YDL034W	YDL034W	0.5368	0.3459	0.4414	0.135	0.0307	0.007
YDL035C	GPR1	0.2845	0.1786	0.2316	0.0749	0.0308	0.0069
YDL036C	YDL036C	0.1534	-0.0259	0.0637	0.1268	0.0294	0.0066
YDL037C	BSC1	-0.3094	0.389	0.0398	0.4938	0.0308	0.0073
YDL038C	YDL038C	-0.5055	-0.3002	-0.4028	0.1452	0.0298	0.0071
YDL039C	PRM7	0.0237	0.3901	0.2069	0.2591	0.0301	0.0069
YDL041W	YDL041W	2.1286	0.8051	1.4668	0.9359	0.0325	0.007
YDL042C	SIR2	0.9693	1.1189	1.0441	0.1058	0.0326	0.0069
YDL044C	MTF2	-0.1463	0.3695	0.1116	0.3648	0.0307	0.0069
YDL045W-A	MRP10	0.0416	0.0294	0.0355	0.0087	0.0307	0.0073
YDL046W	NPC2	0.2015	-0.0448	0.0784	0.1742	0.0302	0.0067
YDL047W	SIT4	3.0512	1.4716	2.2614	1.1169	0.035	0.0072
YDL048C	STP4	-1.2778	-0.5005	-0.8891	0.5496	0.0299	0.0069
YDL049C	KNH1	0.4265	0.5322	0.4794	0.0748	0.0311	0.0071
YDL050C	YDL050C	1.6058	0.5196	1.0627	0.7681	0.0319	0.0068
YDL051W	LHP1	0.2378	0.3749	0.3063	0.0969	0.0307	0.0066
YDL052C	SLC1	-0.5416	-0.3081	-0.4248	0.1651	0.0296	0.0067
YDL053C	PBP4	0.2381	0.1528	0.1955	0.0603	0.0303	0.0069
YDL054C	MCH1	0.0216	-0.2126	-0.0955	0.1656	0.0302	0.007
YDL056W	MBP1	-0.1428	0.2733	0.0652	0.2942	0.0305	0.0074
YDL057W	YDL057W	0.2081	0.292	0.25	0.0594	0.0314	0.0072
YDL059C	RAD59	0.0742	0.4657	0.2699	0.2768	0.031	0.0071
YDL061C	RPS29B	0.5023	0.2582	0.3803	0.1726	0.0305	0.007
YDL063C	YDL063C	-0.2295	0.2354	0.003	0.3288	0.0304	0.0071
YDL065C	PEX19	-0.3273	-0.1592	-0.2432	0.1189	0.0305	0.0077
YDL066W	IDP1	0.0879	0.0265	0.0572	0.0434	0.0301	0.0071
YDL067C	COX9	-1.029	-0.3792	-0.7041	0.4595	0.03	0.007
YDL068W	YDL068W	0.9156	0.1842	0.5499	0.5172	0.0321	0.007
YDL069C	CBS1	-0.0969	0.9557	0.4294	0.7443	0.031	0.0074
YDL070W	BDF2	0.4355	0.1793	0.3074	0.1812	0.0301	0.007
YDL071C	YDL071C	-0.1345	1.2266	0.5461	0.9625	0.0306	0.0068
YDL073W	YDL073W	0.9612	1.6515	1.3063	0.4882	0.0335	0.0066
YDL074C	BRE1	0.09	-0.123	-0.0165	0.1506	0.0311	0.007
YDL075W	RPL31A	-0.9564	-0.9015	-0.929	0.0388	0.0291	0.0067
YDL076C	RXT3	-1.0263	-0.2405	-0.6334	0.5556	0.0304	0.007
YDL078C	MDH3	0.7572	1.2612	1.0092	0.3564	0.0306	0.0067
YDL079C	MRK1	-0.0575	0.0647	0.0036	0.0864	0.0297	0.0068
YDL080C	THI3	0.8689	0.2006	0.5348	0.4726	0.0309	0.0068
YDL081C	RPP1A	1.6735	-0.0787	0.7974	1.239	0.0322	0.0068
YDL082W	RPL13A	-0.2413	-0.5079	-0.3746	0.1885	0.0289	0.0066
YDL083C	RPS16B	0.4689	0.3558	0.4124	0.08	0.0305	0.007
YDL085W	NDE2	-0.0387	-0.2002	-0.1194	0.1142	0.0296	0.0067
YDL086W	YDL086W	-0.1436	0.3681	0.1123	0.3618	0.03	0.0068
YDL088C	ASM4	-0.0246	0.5066	0.241	0.3756	0.0315	0.0071
YDL089W	YDL089W	1.4409	0.6887	1.0648	0.5318	0.0312	0.0067
YDL090C	RAM1	0.0288	-0.2005	-0.0858	0.1621	0.0303	0.0076
YDL091C	YDL091C	1.697	-0.0681	0.8144	1.248	0.0302	0.0071
YDL093W	PMT5	0.0195	0.2905	0.155	0.1917	0.0293	0.0068
YDL094C	YDL094C	-0.336	-0.153	-0.2445	0.1294	0.0307	0.0072
YDL095W	PMT1	0.3557	0.1313	0.2435	0.1587	0.0308	0.007
YDL096C	YDL096C	0.1192	-0.0976	0.0108	0.1533	0.0301	0.0069
YDL099W	YDL099W	0.4668	-0.1316	0.1676	0.4231	0.0303	0.0069
YDL100C	ARR4	0.1563	-0.1189	0.0187	0.1946	0.0308	0.0073
YDL101C	DUN1	2.134	1.2639	1.6989	0.6152	0.034	0.0081
YDL104C	QRI7	-0.3447	-0.2032	-0.2739	0.1	0.0303	0.007
YDL106C	PHO2	0.8784	0.5734	0.7259	0.2157	0.0325	0.0073
YDL107W	MSS2	0.2901	0.0701	0.1801	0.1556	0.0306	0.0071
YDL109C	YDL109C	0.3084	0.2733	0.2908	0.0249	0.0306	0.0069
YDL110C	YDL110C	-0.0903	-0.0567	-0.0735	0.0238	0.03	0.0069
YDL112W	TRM3	0.5194	0.2565	0.388	0.1859	0.0309	0.007
YDL113C	ATG20	0.1546	-0.0171	0.0687	0.1214	0.0305	0.0071
YDL114W	YDL114W	0.7194	0.5404	0.6299	0.1266	0.0308	0.0068
YDL115C	IWR1	1.5525	-0.4086	0.572	1.3868	0.033	0.0072
YDL116W	NUP84	-0.602	-0.0722	-0.3371	0.3746	0.0308	0.0072
YDL117W	CYK3	-0.0799	-0.4835	-0.2817	0.2854	0.0312	0.007
YDL118W	YDL118W	-0.0868	-0.1502	-0.1185	0.0449	0.0301	0.007
YDL119C	YDL119C	1.0495	0.2354	0.6425	0.5757	0.031	0.0069
YDL121C	YDL121C	-0.5385	-0.4406	-0.4896	0.0692	0.0298	0.007
YDL122W	UBP1	-0.4522	-0.3879	-0.42	0.0454	0.0295	0.0068
YDL123W	SNA4	0.5026	0.2046	0.3536	0.2107	0.0305	0.007
YDL124W	YDL124W	0.5049	0.8279	0.6664	0.2284	0.0302	0.0065
YDL125C	HNT1	0.581	0.4521	0.5165	0.0911	0.031	0.0071
YDL127W	PCL2	0.5026	0.2048	0.3537	0.2106	0.0303	0.007
YDL128W	VCX1	-0.0496	-0.2477	-0.1487	0.1401	0.0301	0.007
YDL129W	YDL129W	0.5728	0.2563	0.4146	0.2238	0.0307	0.0072
YDL130W	RPP1B	0.3504	0.175	0.2627	0.124	0.0308	0.0071
YDL130W-A	STF1	1.1133	-0.0536	0.5299	0.8251	0.031	0.0067
YDL131W	LYS21	0.8173	0.0324	0.4248	0.555	0.0303	0.0069
YDL133C-A	RPL41B	-0.1458	1.4738	0.664	1.1453	0.031	0.0067
YDL133W	YDL133W	0.1569	-0.023	0.067	0.1272	0.0306	0.0071
YDL134C	PPH21	-0.545	-0.4694	-0.5072	0.0535	0.0301	0.0071
YDL134C-A	YDL134C-A	0.8329	0.5221	0.6775	0.2198	0.0322	0.007
YDL136W	RPL35B	1.3788	0.1781	0.7784	0.8491	0.0305	0.0071
YDL137W	ARF2	0.1768	0.2181	0.1975	0.0292	0.0303	0.007
YDL138W	RGT2	0.333	0.0721	0.2026	0.1845	0.0299	0.0065
YDL142C	CRD1	0.7387	0.8587	0.7987	0.0849	0.0314	0.007
YDL144C	YDL144C	0.3388	-0.0994	0.1197	0.3098	0.0304	0.007
YDL149W	ATG9	-0.9382	-0.3345	-0.6363	0.4269	0.0294	0.007
YDL151C	BUD30	1.7013	0.5764	1.1388	0.7955	0.0326	0.0072
YDL154W	MSH5	-0.3781	1.3724	0.4971	1.2378	0.03	0.0067
YDL155W	CLB3	0.2974	0.9898	0.6436	0.4896	0.0306	0.007
YDL156W	YDL156W	0.3584	-0.9154	-0.2785	0.9007	0.0301	0.0069
YDL157C	YDL157C	-0.0877	-0.3217	-0.2047	0.1654	0.0301	0.0071
YDL159W	STE7	-0.2746	-0.107	-0.1908	0.1185	0.03	0.0069
YDL160C	DHH1	0.4689	0.2325	0.3507	0.1672	0.0305	0.007
YDL161W	ENT1	0.2193	0.4031	0.3112	0.1299	0.0309	0.007
YDL162C	YDL162C	-0.3335	0.3008	-0.0164	0.4485	0.0303	0.0068
YDL168W	SFA1	0.7925	0.2314	0.5119	0.3967	0.0299	0.0065
YDL169C	UGX2	-0.0817	-0.3288	-0.2052	0.1748	0.0297	0.0068
YDL170W	UGA3	-0.4406	-0.009	-0.2248	0.3052	0.0302	0.007
YDL171C	GLT1	0.3213	0.1216	0.2215	0.1412	0.0304	0.0067
YDL172C	YDL172C	0.2274	-0.3447	-0.0587	0.4046	0.0302	0.0071
YDL173W	YDL173W	1.1021	0.6337	0.8679	0.3312	0.031	0.0066
YDL174C	DLD1	-0.6495	0.1256	-0.2619	0.548	0.0302	0.0072
YDL175C	AIR2	0.2963	0.2343	0.2653	0.0438	0.0307	0.0071
YDL176W	YDL176W	0.4355	0.2048	0.3202	0.1631	0.0305	0.007
YDL177C	YDL177C	1.4139	0.4528	0.9334	0.6795	0.0304	0.0068
YDL178W	DLD2	0.1682	0.1034	0.1358	0.0459	0.0304	0.0069
YDL179W	PCL9	0.2284	0.1263	0.1773	0.0722	0.0305	0.0071
YDL180W	YDL180W	0.0227	0.6341	0.3284	0.4323	0.0306	0.007
YDL181W	INH1	0.118	0.4992	0.3086	0.2696	0.0314	0.0072
YDL182W	LYS20	-0.7873	-0.0819	-0.4346	0.4988	0.0298	0.0067
YDL183C	YDL183C	0.3388	0.1564	0.2476	0.129	0.0304	0.007
YDL184C	RPL41A	-0.0138	-0.2848	-0.1493	0.1916	0.0302	0.0071
YDL186W	YDL186W	1.3658	-0.5266	0.4196	1.3381	0.0301	0.0073
YDL187C	YDL187C	-0.0542	0.3968	0.1713	0.3189	0.0308	0.0071
YDL189W	RBS1	-0.1385	-0.1539	-0.1462	0.0109	0.0303	0.0069
YDL190C	UFD2	0.1034	-0.2208	-0.0587	0.2292	0.0302	0.0071
YDL191W	RPL35A	1.37	0.159	0.7645	0.8563	0.0305	0.0071
YDL192W	ARF1	0.4353	0.2048	0.3201	0.163	0.0305	0.007
YDL194W	SNF3	0.94	1.0485	0.9942	0.0767	0.0307	0.0068
YDL197C	ASF2	0.1316	0.3244	0.228	0.1363	0.031	0.0071
YDL199C	YDL199C	0.3504	0.1849	0.2677	0.117	0.0307	0.007
YDL200C	MGT1	0.4159	0.0045	0.2102	0.2909	0.0305	0.0068
YDL201W	TRM8	-0.2264	-0.2041	-0.2153	0.0158	0.0306	0.007
YDL203C	YDL203C	0.8133	0.0348	0.4241	0.5505	0.031	0.0069
YDL204W	RTN2	0.0831	-0.2561	-0.0865	0.2399	0.0306	0.007
YDL206W	YDL206W	-0.2145	-0.7254	-0.4699	0.3613	0.0303	0.0072
YDL210W	UGA4	0.556	0.1821	0.3691	0.2644	0.0307	0.0072
YDL211C	YDL211C	0.4102	0.2048	0.3075	0.1452	0.0305	0.007
YDL213C	NOP6	1.3032	0.0021	0.6526	0.92	0.0305	0.0069
YDL214C	PRR2	0.4689	0.177	0.323	0.2065	0.0306	0.007
YDL215C	GDH2	-0.1724	0.2432	0.0354	0.2939	0.0303	0.0069
YDL216C	RRI1	0.2592	0.3937	0.3265	0.0951	0.0304	0.0069
YDL218W	YDL218W	-0.0747	0.5688	0.247	0.455	0.0308	0.0071
YDL219W	DTD1	-0.2913	0.4397	0.0742	0.5169	0.0308	0.0069
YDL222C	FMP45	0.2337	0.0053	0.1195	0.1615	0.0304	0.007
YDL223C	HBT1	0.1544	0.3198	0.2371	0.1169	0.0309	0.0066
YDL224C	WHI4	0.0472	0.6364	0.3418	0.4166	0.0309	0.0072
YDL225W	SHS1	0.2404	0.0504	0.1454	0.1344	0.0312	0.0073
YDL226C	GCS1	1.8476	0.1726	1.0101	1.1845	0.0307	0.0073
YDL227C	HO	0.8963	0.3219	0.6091	0.4061	0.0313	0.0074
YDL229W	SSB1	0.7212	0.1198	0.4205	0.4252	0.0301	0.0069
YDL230W	PTP1	-0.0588	0.8083	0.3747	0.6131	0.0306	0.0066
YDL231C	BRE4	0.1446	0.3908	0.2677	0.1741	0.0308	0.0069
YDL232W	OST4	1.2542	1.0549	1.1545	0.1409	0.0315	0.0077
YDL233W	YDL233W	0.3982	0.4626	0.4304	0.0456	0.0308	0.0068
YDL234C	GYP7	1.0595	-0.0676	0.4959	0.797	0.0304	0.007
YDL236W	PHO13	-0.9701	0.2384	-0.3658	0.8545	0.0302	0.0067
YDL237W	YDL237W	0.3822	0.4468	0.4145	0.0457	0.0307	0.0069
YDL238C	YDL238C	-0.4706	0.5341	0.0317	0.7105	0.0302	0.0069
YDL239C	ADY3	0.3641	0.3306	0.3474	0.0237	0.0309	0.0072
YDL240W	LRG1	0.4353	0.177	0.3061	0.1827	0.0311	0.0071
YDL241W	YDL241W	0.4207	0.3402	0.3804	0.057	0.0303	0.0069
YDL242W	YDL242W	0.0797	0.3913	0.2355	0.2204	0.0307	0.007
YDL243C	AAD4	0.1178	-0.2068	-0.0445	0.2295	0.0304	0.0072
YDR001C	NTH1	0.6991	-0.1217	0.2887	0.5804	0.0305	0.007
YDR003W	YDR003W	0.8834	-0.2856	0.2989	0.8266	0.0315	0.0069
YDR004W	RAD57	-0.2768	0.7846	0.2539	0.7505	0.0319	0.0076
YDR005C	MAF1	0.3332	0.2438	0.2885	0.0632	0.0305	0.0072
YDR006C	SOK1	0.461	-0.155	0.153	0.4356	0.0304	0.0069
YDR007W	TRP1	0.0455	0.5485	0.297	0.3556	0.0311	0.0071
YDR008C	YDR008C	0.2336	0.2086	0.2211	0.0176	0.0308	0.0069
YDR009W	GAL3	-0.1642	-0.0018	-0.083	0.1148	0.0304	0.007
YDR010C	YDR010C	-0.2474	0.1441	-0.0516	0.2768	0.0304	0.0068
YDR011W	SNQ2	-0.3571	-0.4019	-0.3795	0.0317	0.0298	0.007
YDR014W	RAD61	-0.0575	-0.116	-0.0868	0.0414	0.0305	0.007
YDR015C	YDR015C	1.1137	0.1973	0.6555	0.648	0.0303	0.0067
YDR017C	KCS1	0.2047	0.0968	0.1507	0.0763	0.0311	0.0072
YDR018C	YDR018C	1.5316	0.1317	0.8317	0.9899	0.0311	0.0068
YDR019C	GCV1	0.3959	0.3716	0.3837	0.0172	0.0307	0.0069
YDR020C	YDR020C	-0.6748	0.5661	-0.0543	0.8775	0.0305	0.0069
YDR022C	CIS1	0.3035	-0.4626	-0.0795	0.5417	0.0302	0.0069
YDR025W	RPS11A	1.5651	0.5448	1.0549	0.7215	0.032	0.007
YDR026C	YDR026C	1.1453	0.2086	0.6769	0.6623	0.0317	0.0069
YDR028C	REG1	0.1481	0.2013	0.1747	0.0376	0.0309	0.0076
YDR029W	YDR029W	0.203	-0.1765	0.0132	0.2683	0.0302	0.0069
YDR030C	RAD28	0.2798	-0.211	0.0344	0.347	0.0313	0.007
YDR031W	YDR031W	0.4355	0.2325	0.334	0.1436	0.0305	0.007
YDR032C	PST2	0.4689	0.2326	0.3508	0.1671	0.0305	0.007
YDR033W	MRH1	0.3807	0.2033	0.292	0.1254	0.0308	0.0071
YDR034C	LYS14	0.5285	0.2924	0.4105	0.167	0.0322	0.0069
YDR035W	ARO3	-0.2634	-0.1576	-0.2105	0.0748	0.0302	0.0069
YDR036C	EHD3	0.3607	-0.6369	-0.1381	0.7054	0.0301	0.0068
YDR042C	YDR042C	0.3463	0.2381	0.2922	0.0765	0.0299	0.0071
YDR043C	NRG1	0.405	-0.2928	0.0561	0.4934	0.0312	0.0072
YDR046C	BAP3	-0.1839	-0.0853	-0.1346	0.0698	0.03	0.007
YDR048C	YDR048C	1.5866	0.3518	0.9692	0.8731	0.0306	0.0075
YDR049W	YDR049W	-0.4851	0.0855	-0.1998	0.4035	0.0312	0.0077
YDR051C	YDR051C	-0.6242	-0.1382	-0.3812	0.3437	0.0293	0.0069
YDR055W	PST1	-0.2078	-0.0151	-0.1114	0.1363	0.0301	0.0071
YDR056C	YDR056C	1.1587	-0.3275	0.4156	1.0509	0.0307	0.0066
YDR057W	YOS9	-0.2733	0.5518	0.1393	0.5835	0.0312	0.0065
YDR058C	TGL2	0.4689	0.4334	0.4512	0.0251	0.0301	0.0069
YDR059C	UBC5	-0.0844	-1.2585	-0.6715	0.8303	0.0304	0.007
YDR061W	YDR061W	-0.023	0.6335	0.3052	0.4642	0.0307	0.007
YDR063W	YDR063W	0.0167	-0.2017	-0.0925	0.1544	0.0302	0.0073
YDR066C	YDR066C	-0.175	-0.194	-0.1845	0.0134	0.0303	0.0072
YDR067C	YDR067C	0.4784	0.012	0.2452	0.3297	0.0309	0.0072
YDR068W	DOS2	-0.2434	-0.3995	-0.3215	0.1104	0.0299	0.007
YDR070C	FMP16	0.0978	-0.4867	-0.1945	0.4133	0.0305	0.007
YDR071C	PAA1	-0.2208	1.0348	0.407	0.8878	0.0308	0.007
YDR072C	IPT1	-0.503	1.2707	0.3838	1.2542	0.0304	0.0071
YDR073W	SNF11	1.5643	0.2485	0.9064	0.9304	0.0302	0.0071
YDR074W	TPS2	1.5604	0.9788	1.2696	0.4113	0.0335	0.0072
YDR075W	PPH3	-0.9302	-0.221	-0.5756	0.5015	0.0299	0.0068
YDR076W	RAD55	0.5548	1.4156	0.9852	0.6086	0.0314	0.0073
YDR077W	SED1	0.14	0.0581	0.0991	0.0579	0.0302	0.007
YDR078C	SHU2	1.0157	0.2325	0.6241	0.5538	0.0324	0.0074
YDR079W	PET100	1.3906	0.1411	0.7659	0.8835	0.0315	0.0071
YDR080W	VPS41	0.2399	0.0748	0.1573	0.1167	0.0302	0.0066
YDR083W	RRP8	2.2528	0.1568	1.2048	1.4821	0.0306	0.0072
YDR084C	TVP23	0.2421	0.3009	0.2715	0.0416	0.0304	0.0069
YDR085C	AFR1	0.4326	0.0863	0.2594	0.2449	0.0305	0.0069
YDR089W	YDR089W	-0.1322	0.2145	0.0411	0.2452	0.0302	0.0072
YDR090C	YDR090C	0.4303	0.669	0.5496	0.1688	0.0308	0.0069
YDR092W	UBC13	0.8168	0.2774	0.5471	0.3815	0.0319	0.0074
YDR093W	DNF2	0.1719	-0.2923	-0.0602	0.3282	0.0301	0.0069
YDR094W	YDR094W	0.4178	0.578	0.4979	0.1133	0.0317	0.007
YDR095C	YDR095C	0.7019	-0.1646	0.2687	0.6127	0.0301	0.0069
YDR096W	GIS1	-0.0418	0.121	0.0396	0.1151	0.03	0.0069
YDR097C	MSH6	0.5801	-0.0629	0.2586	0.4546	0.0308	0.0069
YDR098C	GRX3	-0.6239	0.1545	-0.2347	0.5504	0.0307	0.0071
YDR099W	BMH2	-0.0122	0.6351	0.3114	0.4578	0.0311	0.0069
YDR100W	TVP15	0.1701	-0.0232	0.0735	0.1367	0.0295	0.0069
YDR101C	ARX1	0.4881	0.1923	0.3402	0.2092	0.0298	0.0068
YDR102C	YDR102C	0.3998	1.1397	0.7697	0.5232	0.0315	0.0069
YDR103W	STE5	0.6676	0.2433	0.4554	0.3	0.0312	0.007
YDR104C	SPO71	-0.1165	1.3031	0.5933	1.0038	0.0305	0.007
YDR105C	TMS1	0.5135	0.2517	0.3826	0.1851	0.0302	0.0069
YDR107C	YDR107C	-0.0692	-0.6492	-0.3592	0.4101	0.0299	0.007
YDR108W	GSG1	-0.4561	-0.3859	-0.421	0.0497	0.0294	0.0067
YDR109C	YDR109C	1.86	-0.629	0.6155	1.76	0.0299	0.0067
YDR110W	FOB1	1.157	-0.5986	0.2792	1.2414	0.031	0.0069
YDR111C	YDR111C	1.0475	0.1639	0.6057	0.6248	0.0313	0.007
YDR112W	YDR112W	0.2325	1.7049	0.9687	1.0411	0.0312	0.0071
YDR115W	YDR115W	-0.1464	0.7025	0.2781	0.6003	0.0314	0.0079
YDR116C	MRPL1	0.4689	0.2325	0.3507	0.1672	0.0305	0.007
YDR117C	YDR117C	1.259	0.2247	0.7419	0.7314	0.0308	0.0069
YDR119W	YDR119W	-0.2131	-0.5077	-0.3604	0.2083	0.0303	0.0069
YDR120C	TRM1	-1.7566	0.2131	-0.7718	1.3928	0.0296	0.0066
YDR121W	DPB4	1.2224	-0.0315	0.5954	0.8867	0.031	0.0074
YDR122W	KIN1	0.78	0.634	0.707	0.1033	0.0317	0.0069
YDR123C	INO2	1.4233	-0.1743	0.6245	1.1297	0.0305	0.0069
YDR124W	YDR124W	-0.5088	0.5091	0.0001	0.7198	0.0306	0.007
YDR125C	ECM18	0.7125	0.6466	0.6796	0.0466	0.0326	0.0069
YDR126W	SWF1	0.6369	0.1591	0.398	0.3378	0.0307	0.007
YDR127W	ARO1	0.446	-0.3106	0.0677	0.535	0.0313	0.0072
YDR128W	YDR128W	0.16	-0.1223	0.0188	0.1997	0.0297	0.0065
YDR129C	SAC6	0.4703	-1.5833	-0.5565	1.4521	0.0298	0.0072
YDR130C	FIN1	0.9544	0.9669	0.9607	0.0088	0.0316	0.0071
YDR131C	YDR131C	0.6012	0.6525	0.6268	0.0363	0.0307	0.0069
YDR132C	YDR132C	0.1427	0.9341	0.5384	0.5597	0.03	0.007
YDR133C	YDR133C	0.1392	0.0469	0.093	0.0653	0.0309	0.0069
YDR134C	YDR134C	0.1138	0.2591	0.1864	0.1028	0.0309	0.0067
YDR135C	YCF1	0.099	0.446	0.2725	0.2454	0.0306	0.0069
YDR136C	VPS61	0.0777	-0.0336	0.022	0.0787	0.0299	0.0069
YDR137W	RGP1	0.8306	0.1646	0.4976	0.4709	0.0305	0.0068
YDR139C	RUB1	0.4406	-0.0733	0.1836	0.3634	0.0302	0.0071
YDR142C	PEX7	-0.3819	0.4744	0.0462	0.6055	0.0305	0.0067
YDR143C	SAN1	0.5231	0.7565	0.6398	0.165	0.0319	0.0071
YDR144C	MKC7	0.3851	-0.2312	0.077	0.4358	0.0307	0.0071
YDR146C	SWI5	0.1766	0.7493	0.4629	0.405	0.0302	0.0072
YDR148C	KGD2	0.0338	0.0171	0.0255	0.0118	0.0304	0.0069
YDR149C	YDR149C	0.5841	0.6444	0.6143	0.0427	0.0321	0.0082
YDR150W	NUM1	2.0733	1.0911	1.5822	0.6945	0.0327	0.0074
YDR151C	CTH1	1.6144	0.1804	0.8974	1.014	0.0313	0.0071
YDR152W	GIR2	0.3657	0.2734	0.3195	0.0653	0.0307	0.0072
YDR153C	ENT5	0.0401	0.1598	0.0999	0.0847	0.0298	0.0067
YDR154C	YDR154C	0.19	0.2274	0.2087	0.0265	0.0307	0.007
YDR155C	CPR1	0.5026	0.2326	0.3676	0.1909	0.0305	0.007
YDR156W	RPA14	0.2122	0.8412	0.5267	0.4448	0.0308	0.0067
YDR157W	YDR157W	0.5026	0.2326	0.3676	0.1909	0.0305	0.007
YDR158W	HOM2	0.3501	-0.2279	0.0611	0.4087	0.0307	0.007
YDR159W	SAC3	0.0189	-0.5797	-0.2804	0.4233	0.0311	0.0072
YDR161W	YDR161W	1.0695	0.7585	0.914	0.22	0.0313	0.007
YDR162C	NBP2	-0.1635	-0.364	-0.2637	0.1418	0.0299	0.0069
YDR163W	CWC15	-0.1182	0.5935	0.2376	0.5032	0.0322	0.0069
YDR165W	TRM82	0.4812	0.0684	0.2748	0.2919	0.0321	0.0074
YDR169C	STB3	-0.221	-0.3276	-0.2743	0.0754	0.0301	0.0068
YDR171W	HSP42	0.2039	-0.3627	-0.0794	0.4006	0.0301	0.0065
YDR174W	HMO1	1.2005	0.1546	0.6776	0.7396	0.0321	0.0071
YDR175C	RSM24	-0.572	0.2544	-0.1588	0.5843	0.0304	0.0068
YDR176W	NGG1	1.1254	-0.1717	0.4769	0.9171	0.031	0.0069
YDR179C	CSN9	0.1385	-0.0997	0.0194	0.1684	0.0302	0.0072
YDR179W-A	YDR179W-A	1.4069	-0.0504	0.6782	1.0305	0.0305	0.007
YDR181C	SAS4	0.5026	0.2863	0.3944	0.1529	0.0301	0.007
YDR183W	PLP1	0.531	0.0767	0.3038	0.3212	0.0303	0.0068
YDR184C	ATC1	0.6833	-0.1301	0.2766	0.5752	0.0307	0.0071
YDR185C	YDR185C	0.1628	-0.1832	-0.0102	0.2446	0.0302	0.0069
YDR186C	YDR186C	0.2083	0.1946	0.2014	0.0096	0.0307	0.007
YDR191W	HST4	1.402	0.4028	0.9024	0.7065	0.0304	0.0068
YDR192C	NUP42	-0.2637	0.3198	0.028	0.4126	0.0303	0.0071
YDR193W	YDR193W	0.4677	0.4126	0.4401	0.039	0.031	0.0072
YDR194C	MSS116	0.0949	-0.5086	-0.2069	0.4267	0.0315	0.0073
YDR195W	REF2	-0.4537	0.8679	0.2071	0.9345	0.0296	0.0076
YDR197W	CBS2	0.1809	0.3952	0.2881	0.1515	0.0309	0.007
YDR198C	YDR198C	1.0211	0.0883	0.5547	0.6596	0.0312	0.0072
YDR199W	YDR199W	0.0126	-0.5658	-0.2766	0.409	0.0301	0.0069
YDR200C	VPS64	0.4689	0.2325	0.3507	0.1672	0.0305	0.007
YDR202C	RAV2	0.4253	-0.2341	0.0956	0.4663	0.0303	0.0066
YDR203W	YDR203W	0.359	-0.8178	-0.2294	0.8321	0.0305	0.0071
YDR205W	MSC2	-0.1601	-0.3638	-0.2619	0.144	0.0297	0.007
YDR206W	EBS1	0.3375	0.1682	0.2529	0.1197	0.0305	0.007
YDR207C	UME6	1.7635	1.4203	1.5919	0.2427	0.032	0.0073
YDR209C	YDR209C	0.708	0.9576	0.8328	0.1765	0.0308	0.0069
YDR210W	YDR210W	0.3671	0.1698	0.2685	0.1395	0.0306	0.0068
YDR213W	UPC2	-0.2484	0.3817	0.0667	0.4455	0.031	0.0071
YDR214W	AHA1	0.0888	-0.2142	-0.0627	0.2143	0.0298	0.0065
YDR215C	YDR215C	0.7883	0.1722	0.4802	0.4357	0.0306	0.007
YDR216W	ADR1	1.7889	0.1041	0.9465	1.1913	0.0315	0.0073
YDR217C	RAD9	0.6759	0.4264	0.5512	0.1764	0.0327	0.0067
YDR218C	SPR28	0.1447	0.1594	0.152	0.0104	0.0307	0.007
YDR219C	YDR219C	0.2977	0.1933	0.2455	0.0738	0.0305	0.0071
YDR220C	YDR220C	0.4965	-0.082	0.2072	0.409	0.0304	0.0069
YDR221W	YDR221W	-0.3211	0.2395	-0.0408	0.3964	0.0307	0.0069
YDR223W	YDR223W	-0.3094	-0.3335	-0.3215	0.0171	0.0305	0.0071
YDR225W	HTA1	0.1884	-0.1713	0.0085	0.2543	0.0299	0.0069
YDR226W	ADK1	-1.156	-0.7976	-0.9768	0.2534	0.0292	0.0081
YDR227W	SIR4	0.2391	0.2997	0.2694	0.0428	0.0317	0.0072
YDR229W	IVY1	-0.8306	1.0784	0.1239	1.3499	0.0302	0.0065
YDR230W	YDR230W	0.9033	0.4336	0.6684	0.3321	0.0318	0.007
YDR231C	COX20	1.0853	-0.2747	0.4053	0.9617	0.0306	0.0068
YDR233C	RTN1	0.1193	0.2148	0.167	0.0675	0.0304	0.0068
YDR234W	LYS4	-0.385	-0.273	-0.329	0.0792	0.0303	0.0074
YDR237W	MRPL7	0.5105	-0.1571	0.1767	0.4721	0.0311	0.0072
YDR239C	YDR239C	1.3505	0.1823	0.7664	0.826	0.0309	0.0069
YDR241W	BUD26	-0.3885	-0.8592	-0.6239	0.3329	0.03	0.007
YDR242W	AMD2	-0.0077	0.3324	0.1623	0.2405	0.0304	0.0071
YDR244W	PEX5	-0.0128	-0.038	-0.0254	0.0178	0.0302	0.007
YDR245W	MNN10	0.0383	-0.7558	-0.3587	0.5615	0.0305	0.007
YDR247W	VHS1	-0.1329	-0.0426	-0.0878	0.0638	0.0299	0.0067
YDR248C	YDR248C	-0.047	0.0427	-0.0021	0.0634	0.03	0.007
YDR249C	YDR249C	-0.1948	0.4575	0.1314	0.4612	0.0304	0.0069
YDR250C	YDR250C	0.2742	-0.2899	-0.0078	0.3989	0.0304	0.0067
YDR251W	PAM1	0.8641	0.3677	0.6159	0.351	0.0309	0.007
YDR252W	BTT1	-0.2341	-0.0788	-0.1565	0.1098	0.0302	0.0066
YDR253C	MET32	-0.1695	0.2408	0.0356	0.2901	0.0307	0.007
YDR254W	CHL4	0.5546	-0.3819	0.0864	0.6621	0.0301	0.0068
YDR255C	RMD5	0.6872	-0.0541	0.3165	0.5242	0.0304	0.0071
YDR256C	CTA1	-0.6146	0.6738	0.0296	0.911	0.0302	0.0068
YDR257C	RMS1	-0.2102	0.0788	-0.0657	0.2044	0.0314	0.0074
YDR258C	HSP78	1.0932	0.2299	0.6616	0.6105	0.0314	0.0068
YDR259C	YAP6	-0.5022	-0.3337	-0.4179	0.1192	0.0299	0.0069
YDR261C	EXG2	0.1771	0.2433	0.2102	0.0468	0.0305	0.0068
YDR262W	YDR262W	0.0933	-0.0861	0.0036	0.1268	0.0303	0.007
YDR263C	DIN7	0.408	0.1917	0.2998	0.1529	0.0305	0.007
YDR265W	PEX10	0.0099	-0.1297	-0.0599	0.0987	0.0307	0.0071
YDR266C	YDR266C	-0.5161	0.233	-0.1415	0.5297	0.0305	0.0072
YDR269C	YDR269C	-0.2409	0.079	-0.081	0.2261	0.0299	0.0068
YDR270W	CCC2	0.2331	0.1833	0.2082	0.0352	0.0303	0.007
YDR271C	YDR271C	-0.1599	0.1457	-0.0071	0.2161	0.0302	0.0071
YDR272W	GLO2	-0.1263	0.3963	0.135	0.3695	0.0307	0.007
YDR273W	DON1	0.6161	0.3522	0.4841	0.1866	0.0309	0.0074
YDR274C	YDR274C	0.1324	0.3885	0.2605	0.1811	0.0307	0.007
YDR275W	BSC2	0.0309	-0.0935	-0.0313	0.088	0.0304	0.0071
YDR277C	MTH1	1.7041	0.2168	0.9605	1.0517	0.0313	0.007
YDR278C	YDR278C	-0.1142	-0.351	-0.2326	0.1674	0.0299	0.007
YDR279W	RNH202	0.756	0.245	0.5005	0.3613	0.031	0.0069
YDR281C	PHM6	0.1101	0.2357	0.1729	0.0888	0.0306	0.0073
YDR282C	YDR282C	-0.0384	0.3409	0.1513	0.2682	0.0305	0.0069
YDR284C	DPP1	0.2066	0.2708	0.2387	0.0454	0.0307	0.0071
YDR285W	ZIP1	0.0431	0.3411	0.1921	0.2107	0.0306	0.0071
YDR286C	YDR286C	-0.1876	0.897	0.3547	0.767	0.0316	0.0071
YDR287W	YDR287W	0.0851	-0.1012	-0.008	0.1317	0.0299	0.0069
YDR289C	RTT103	0.3583	-0.2388	0.0597	0.4222	0.0308	0.0068
YDR290W	SWS1	-0.4869	0.6512	0.0822	0.8048	0.03	0.0068
YDR291W	YDR291W	0.1716	0.356	0.2638	0.1304	0.0309	0.0068
YDR293C	SSD1	-0.2652	-0.1788	-0.222	0.0611	0.0296	0.0075
YDR294C	DPL1	-0.8972	-0.1953	-0.5463	0.4964	0.0292	0.0066
YDR297W	SUR2	1.0765	0.4546	0.7656	0.4397	0.0329	0.0067
YDR304C	CPR5	-0.0656	0.4535	0.194	0.3671	0.0303	0.0068
YDR305C	HNT2	-0.3316	0.4258	0.0471	0.5355	0.0315	0.0072
YDR306C	YDR306C	0.0725	0.3547	0.2136	0.1996	0.0306	0.0069
YDR307W	YDR307W	-0.1796	-0.6637	-0.4216	0.3423	0.03	0.0067
YDR309C	GIC2	0.0881	-0.0484	0.0199	0.0965	0.0299	0.0068
YDR310C	SUM1	-0.9052	-0.2969	-0.6011	0.4301	0.0294	0.0072
YDR312W	SSF2	-0.629	-1.198	-0.9135	0.4023	0.0292	0.0069
YDR313C	PIB1	0.8019	-0.3683	0.2168	0.8275	0.0306	0.007
YDR314C	YDR314C	-0.5559	0.4431	-0.0564	0.7064	0.0303	0.0071
YDR315C	IPK1	0.4384	0.127	0.2827	0.2202	0.0301	0.0069
YDR316W	YDR316W	-0.0882	0.0346	-0.0268	0.0868	0.0312	0.0075
YDR317W	YDR317W	0.3598	0.166	0.2629	0.137	0.0308	0.0068
YDR318W	MCM21	0.4577	0.3193	0.3885	0.0979	0.0307	0.0068
YDR319C	YDR319C	1.122	-0.1609	0.4805	0.9072	0.0306	0.007
YDR320C	SWA2	-0.1696	0.2028	0.0166	0.2633	0.0324	0.0073
YDR321W	ASP1	-0.1624	0.2994	0.0685	0.3265	0.0304	0.0065
YDR322W	MRPL35	0.2607	-0.6435	-0.1914	0.6393	0.0311	0.0069
YDR323C	PEP7	1.0178	-0.0884	0.4647	0.7822	0.0313	0.0072
YDR326C	YDR326C	0.8449	-0.3066	0.2691	0.8142	0.0302	0.0065
YDR329C	PEX3	0.3526	-0.2352	0.0587	0.4157	0.0299	0.0072
YDR330W	YDR330W	-0.182	-0.1158	-0.1489	0.0469	0.0299	0.0069
YDR333C	YDR333C	-0.5656	-0.0145	-0.29	0.3897	0.0302	0.0068
YDR334W	YDR334W	0.9957	0.376	0.6858	0.4382	0.0318	0.0073
YDR335W	MSN5	0.1534	-1.0786	-0.4626	0.8712	0.0303	0.0069
YDR336W	YDR336W	0.5578	0.907	0.7324	0.2469	0.0314	0.0075
YDR337W	MRPS28	0.5026	0.2048	0.3537	0.2106	0.0305	0.007
YDR338C	YDR338C	0.5945	0.5161	0.5553	0.0554	0.0306	0.0068
YDR340W	YDR340W	-0.5321	0.9559	0.2119	1.0522	0.0302	0.0066
YDR344C	YDR344C	0.211	0.2442	0.2276	0.0235	0.0306	0.0069
YDR346C	SVF1	0.5935	0.1414	0.3675	0.3197	0.0306	0.007
YDR347W	MRP1	1.1338	0.0962	0.615	0.7338	0.0327	0.0076
YDR348C	YDR348C	0.2457	0.2027	0.2242	0.0304	0.0305	0.0069
YDR349C	YPS7	-0.2652	-0.7076	-0.4864	0.3128	0.03	0.0066
YDR350C	TCM10	0.507	1.6212	1.0641	0.7878	0.0308	0.0073
YDR351W	SBE2	0.7627	0.2283	0.4955	0.3779	0.0305	0.0073
YDR352W	YDR352W	-0.4568	0.9767	0.26	1.0137	0.0295	0.0065
YDR354W	TRP4	0.4545	1.1129	0.7837	0.4656	0.03	0.0067
YDR357C	YDR357C	0.3787	0.057	0.2179	0.2275	0.0306	0.007
YDR358W	GGA1	0.0128	0.1848	0.0988	0.1216	0.0302	0.0068
YDR360W	YDR360W	-0.2661	0.1979	-0.0341	0.3281	0.0304	0.007
YDR363W	ESC2	-0.0342	1.0203	0.493	0.7456	0.0314	0.0075
YDR363W-A	SEM1	0.4355	0.1771	0.3063	0.1827	0.0305	0.007
YDR364C	CDC40	-0.4001	-0.5721	-0.4861	0.1216	0.0307	0.0078
YDR368W	YPR1	-0.4226	0.2611	-0.0808	0.4834	0.0304	0.0069
YDR369C	XRS2	1.8215	-0.0283	0.8966	1.308	0.0317	0.0072
YDR370C	YDR370C	-0.212	-0.189	-0.2005	0.0163	0.03	0.0069
YDR371W	CTS2	0.442	-0.2334	0.1043	0.4776	0.0304	0.0069
YDR372C	VPS74	-0.5801	-0.4916	-0.5358	0.0626	0.0291	0.0069
YDR374C	YDR374C	0.2164	0.5338	0.3751	0.2244	0.0305	0.007
YDR375C	BCS1	-0.4758	0.0711	-0.2023	0.3867	0.0316	0.0073
YDR377W	ATP17	0.4395	0.4696	0.4546	0.0213	0.0308	0.0069
YDR378C	LSM6	0.563	0.2587	0.4109	0.2152	0.031	0.0073
YDR379W	RGA2	0.4237	0.1054	0.2646	0.2251	0.0301	0.0068
YDR380W	ARO10	0.1924	0.1916	0.192	0.0005	0.0305	0.007
YDR382W	RPP2B	0.0785	-0.1385	-0.03	0.1535	0.0303	0.0072
YDR383C	NKP1	-0.0504	0.0697	0.0096	0.0849	0.0305	0.0071
YDR384C	ATO3	0.1043	0.4029	0.2536	0.2111	0.0308	0.0066
YDR385W	EFT2	0.2458	-0.2005	0.0227	0.3155	0.0303	0.0068
YDR386W	MUS81	0.6327	0.2873	0.46	0.2443	0.03	0.0067
YDR387C	YDR387C	-0.188	-0.1018	-0.1449	0.061	0.0305	0.0068
YDR388W	RVS167	0.433	0.5702	0.5016	0.097	0.0307	0.0069
YDR389W	SAC7	0.347	0.5717	0.4594	0.1589	0.0319	0.0069
YDR391C	YDR391C	0.0071	0.1467	0.0769	0.0987	0.0302	0.0065
YDR392W	SPT3	-0.5131	-0.4055	-0.4593	0.076	0.0293	0.0069
YDR393W	SHE9	0.3598	-0.359	0.0004	0.5082	0.0308	0.0073
YDR395W	SXM1	0.0635	-0.4981	-0.2173	0.3972	0.0303	0.007
YDR399W	HPT1	0.0966	1.5636	0.8301	1.0373	0.031	0.0067
YDR400W	URH1	-0.5108	-0.4112	-0.461	0.0704	0.0294	0.0067
YDR401W	YDR401W	0.6141	-0.0493	0.2824	0.4691	0.0312	0.0066
YDR402C	DIT2	-0.3699	-0.7124	-0.5412	0.2422	0.0298	0.0068
YDR403W	DIT1	0.1597	0.383	0.2713	0.1579	0.0308	0.007
YDR405W	MRP20	-0.3268	1.3823	0.5278	1.2085	0.0306	0.0074
YDR406W	PDR15	-0.0973	-0.1651	-0.1312	0.048	0.0298	0.0068
YDR408C	ADE8	1.3362	0.3604	0.8483	0.69	0.0323	0.0074
YDR409W	SIZ1	0.2974	0.4304	0.3639	0.094	0.0313	0.0071
YDR410C	STE14	-0.4917	-0.6083	-0.55	0.0825	0.0298	0.007
YDR411C	YDR411C	-0.4008	-0.0382	-0.2195	0.2564	0.0301	0.0069
YDR414C	ERD1	-1.7775	-1.3611	-1.5693	0.2944	0.0277	0.007
YDR415C	YDR415C	0.2339	-0.6537	-0.2099	0.6276	0.0301	0.0068
YDR417C	YDR417C	-1.5362	-0.2475	-0.8918	0.9113	0.0285	0.0065
YDR418W	RPL12B	-0.522	-0.9177	-0.7199	0.2798	0.0292	0.0067
YDR419W	RAD30	1.4199	0.0189	0.7194	0.9907	0.0303	0.007
YDR420W	HKR1	0.4225	-0.0193	0.2016	0.3124	0.0309	0.0069
YDR421W	ARO80	0.0137	-0.4736	-0.23	0.3446	0.0309	0.007
YDR422C	SIP1	-0.3545	0.214	-0.0703	0.402	0.0298	0.0068
YDR423C	CAD1	0.3699	-0.2525	0.0587	0.4402	0.0304	0.0069
YDR424C	DYN2	-0.3182	-0.029	-0.1736	0.2045	0.0302	0.0069
YDR425W	SNX41	0.3887	-0.4929	-0.0521	0.6233	0.0296	0.007
YDR426C	YDR426C	-0.2082	-0.5228	-0.3655	0.2225	0.0293	0.0065
YDR428C	YDR428C	0.4017	0.3265	0.3641	0.0532	0.0311	0.0071
YDR430C	CYM1	-0.3431	-0.1484	-0.2458	0.1377	0.0306	0.0069
YDR431W	YDR431W	-0.3479	0.1201	-0.1139	0.331	0.0309	0.0074
YDR435C	PPM1	-0.9745	-0.3189	-0.6467	0.4635	0.0293	0.0065
YDR436W	PPZ2	0.4691	-0.372	0.0485	0.5947	0.0306	0.007
YDR438W	YDR438W	0.4663	0.4872	0.4768	0.0148	0.0307	0.0068
YDR439W	LRS4	0.9561	0.0026	0.4794	0.6742	0.0312	0.0075
YDR440W	DOT1	0.738	0.7135	0.7257	0.0173	0.034	0.0065
YDR441C	APT2	1.2265	1.066	1.1462	0.1135	0.0321	0.0069
YDR442W	YDR442W	-1.2199	-1.0247	-1.1223	0.138	0.0288	0.0076
YDR443C	SSN2	0.874	1.5142	1.1941	0.4526	0.0327	0.0067
YDR444W	YDR444W	0.029	-0.2006	-0.0858	0.1623	0.0303	0.007
YDR445C	YDR445C	0.3244	0.2048	0.2646	0.0846	0.0298	0.0069
YDR447C	RPS17B	1.0857	0.3105	0.6981	0.5481	0.0306	0.0067
YDR448W	ADA2	0.9967	0.1905	0.5936	0.5701	0.0309	0.0071
YDR450W	RPS18A	0.7804	0.1132	0.4468	0.4718	0.0312	0.0071
YDR451C	YHP1	-0.6579	0.0862	-0.2859	0.5261	0.0305	0.0073
YDR452W	PPN1	0.2542	1.1837	0.7189	0.6573	0.0315	0.0076
YDR455C	YDR455C	0.2873	0.3067	0.297	0.0137	0.0299	0.0069
YDR456W	NHX1	0.0815	0.3961	0.2388	0.2225	0.0316	0.007
YDR457W	TOM1	0.9248	1.0036	0.9642	0.0557	0.0306	0.0071
YDR458C	YDR458C	0.7659	0.3253	0.5456	0.3116	0.0311	0.0071
YDR459C	YDR459C	0.031	-0.0935	-0.0312	0.0881	0.0306	0.0069
YDR461W	MFA1	0.2598	0.1327	0.1962	0.0899	0.0311	0.007
YDR462W	MRPL28	1.1933	0.6572	0.9252	0.3791	0.032	0.007
YDR463W	STP1	0.1562	0.9639	0.5601	0.5711	0.0325	0.0072
YDR465C	RMT2	1.7795	0.3528	1.0662	1.0088	0.0325	0.0071
YDR466W	YDR466W	0.4182	0.0472	0.2327	0.2624	0.0302	0.007
YDR467C	YDR467C	0.1535	0.8643	0.5089	0.5026	0.0307	0.007
YDR469W	SDC1	-0.1786	0.4107	0.1161	0.4167	0.0305	0.0071
YDR470C	UGO1	1.5692	-0.3095	0.6299	1.3285	0.031	0.0073
YDR471W	RPL27B	-0.5797	0.7511	0.0857	0.941	0.0301	0.0067
YDR474C	YDR474C	0.8934	0.0786	0.486	0.5762	0.0302	0.0068
YDR475C	JIP4	-0.1581	-0.5389	-0.3485	0.2693	0.0299	0.0069
YDR476C	YDR476C	0.6705	0.5463	0.6084	0.0879	0.032	0.0071
YDR477W	SNF1	2.6315	1.9058	2.2687	0.5132	0.0336	0.0075
YDR479C	PEX29	0.3085	0.3321	0.3203	0.0167	0.0297	0.0067
YDR480W	DIG2	-0.2795	-0.168	-0.2237	0.0788	0.0304	0.0069
YDR481C	PHO8	0.1174	0.2544	0.1859	0.0969	0.0306	0.0071
YDR482C	CWC21	-0.7108	-0.1966	-0.4537	0.3636	0.0301	0.0073
YDR483W	KRE2	-0.1636	-0.144	-0.1538	0.0138	0.0305	0.0071
YDR484W	VPS52	1.2463	-0.1456	0.5503	0.9842	0.0307	0.0071
YDR485C	VPS72	0.604	0.625	0.6145	0.0148	0.0311	0.007
YDR486C	VPS60	0.0305	0.0309	0.0307	0.0003	0.0301	0.0069
YDR488C	PAC11	1.0847	-0.0053	0.5397	0.7707	0.0304	0.0071
YDR490C	PKH1	0.902	1.0457	0.9738	0.1016	0.0317	0.0071
YDR491C	YDR491C	0.2419	-0.4541	-0.1061	0.4921	0.0303	0.007
YDR492W	YDR492W	0.3693	-0.0002	0.1845	0.2613	0.0306	0.0068
YDR493W	FMP36	0.092	0.2582	0.1751	0.1176	0.0306	0.0072
YDR494W	RSM28	0.1312	0.0869	0.1091	0.0313	0.0307	0.007
YDR495C	VPS3	0.7454	-0.13	0.3077	0.619	0.0313	0.0067
YDR496C	PUF6	1.0806	0.0574	0.569	0.7236	0.0308	0.0069
YDR497C	ITR1	1.0841	-0.673	0.2056	1.2424	0.0307	0.0069
YDR500C	RPL37B	0.8528	0.0201	0.4364	0.5888	0.0314	0.0071
YDR501W	PLM2	1.2641	-0.1613	0.5514	1.0079	0.0305	0.0067
YDR502C	SAM2	-0.2239	0.7001	0.2381	0.6533	0.0306	0.0071
YDR503C	LPP1	0.9979	-0.4328	0.2825	1.0116	0.0301	0.0073
YDR504C	YDR504C	-0.0627	-0.1777	-0.1202	0.0813	0.0302	0.0069
YDR505C	PSP1	0.1945	0.0249	0.1097	0.1199	0.0308	0.007
YDR506C	YDR506C	-0.1239	-0.1589	-0.1414	0.0248	0.0303	0.0068
YDR506C	YDR506C	-0.5583	0.0916	-0.2333	0.4596	0.0298	0.0068
YDR507C	GIN4	0.8456	0.9434	0.8945	0.0692	0.0319	0.0068
YDR508C	GNP1	0.0021	0.2277	0.1149	0.1596	0.0307	0.0071
YDR509W	YDR509W	-0.2028	0.2228	0.01	0.3009	0.0302	0.0069
YDR511W	ACN9	0.4531	-0.0367	0.2082	0.3464	0.03	0.0067
YDR512C	EMI1	0.9769	0.1551	0.566	0.5811	0.0312	0.007
YDR513W	TTR1	0.6046	-0.989	-0.1922	1.1269	0.0297	0.0069
YDR514C	YDR514C	0.0332	0.4379	0.2356	0.2862	0.031	0.0072
YDR515W	SLF1	1.1573	0.7789	0.9681	0.2676	0.0311	0.007
YDR516C	EMI2	-0.9729	-0.4213	-0.6971	0.3901	0.0296	0.0071
YDR517W	GRH1	-0.1329	0.0639	-0.0345	0.1391	0.0299	0.0068
YDR518W	EUG1	-0.1455	0.2129	0.0337	0.2534	0.0306	0.0069
YDR519W	FPR2	1.4048	0.6894	1.0471	0.5059	0.0306	0.0071
YDR522C	SPS2	1.7618	0.0514	0.9066	1.2094	0.0303	0.0065
YDR523C	SPS1	-0.0972	0.5461	0.2244	0.4549	0.0309	0.007
YDR524C	AGE1	0.9034	0.455	0.6792	0.3171	0.0312	0.0069
YDR525W-A	SNA2	0.0708	0.9807	0.5257	0.6434	0.0297	0.0064
YDR528W	HLR1	-0.3784	0.3332	-0.0226	0.5032	0.0301	0.0069
YDR529C	QCR7	0.213	1.1794	0.6962	0.6834	0.0311	0.0071
YDR530C	APA2	1.172	-0.0646	0.5537	0.8744	0.0302	0.0067
YDR532C	YDR532C	-0.9879	0.0854	-0.4513	0.7589	0.0299	0.0069
YDR533C	YDR533C	0.096	0.1082	0.1021	0.0087	0.0304	0.0068
YDR534C	FIT1	1.2316	0.7351	0.9834	0.351	0.0309	0.0069
YDR535C	YDR535C	-0.3121	0.1354	-0.0883	0.3164	0.0304	0.0067
YDR536W	STL1	0.7005	1.1251	0.9128	0.3003	0.0311	0.0069
YDR537C	YDR537C	0.0667	0.0673	0.067	0.0004	0.0304	0.0072
YDR538W	PAD1	-0.4041	-0.7644	-0.5843	0.2548	0.0295	0.0069
YDR539W	YDR539W	0.8543	-0.1755	0.3394	0.7282	0.0307	0.0068
YDR540C	YDR540C	0.1406	0.0073	0.0739	0.0942	0.0304	0.007
YDR541C	YDR541C	-0.033	0.0636	0.0153	0.0683	0.0303	0.0071
YEL001C	YEL001C	1.885	0.1388	1.0119	1.2348	0.0301	0.0068
YEL003W	GIM4	-0.2248	0.1514	-0.0367	0.266	0.0305	0.007
YEL004W	YEA4	-0.2651	-0.0462	-0.1557	0.1547	0.0308	0.0074
YEL005C	VAB2	0.2851	0.5502	0.4176	0.1874	0.0306	0.0069
YEL006W	YEL006W	1.3971	0.3105	0.8538	0.7683	0.0308	0.0071
YEL007W	YEL007W	-0.9087	-0.3928	-0.6507	0.3648	0.0288	0.0075
YEL008W	YEL008W	0.0695	-0.2697	-0.1001	0.2399	0.0309	0.0072
YEL009C	GCN4	0.0971	0.0314	0.0643	0.0465	0.0301	0.0066
YEL010W	YEL010W	-0.4257	0.1409	-0.1424	0.4006	0.03	0.0068
YEL011W	GLC3	0.6905	-0.1014	0.2945	0.5599	0.0307	0.0067
YEL012W	UBC8	1.6461	0.4275	1.0368	0.8617	0.0313	0.0068
YEL013W	VAC8	-0.2987	-0.175	-0.2369	0.0875	0.0301	0.0071
YEL014C	YEL014C	-0.1901	0.3844	0.0972	0.4062	0.03	0.0068
YEL015W	EDC3	-0.2018	1.3384	0.5683	1.089	0.0312	0.0068
YEL016C	YEL016C	0.1374	-0.284	-0.0733	0.298	0.0304	0.0071
YEL017C-A	PMP2	0.4904	0.2664	0.3784	0.1583	0.0305	0.0068
YEL017W	GTT3	0.0611	0.2744	0.1677	0.1508	0.0311	0.007
YEL020C	YEL020C	-0.1125	-0.1467	-0.1296	0.0242	0.0302	0.0072
YEL023C	YEL023C	0.1598	0.0646	0.1122	0.0673	0.0304	0.0072
YEL024W	RIP1	1.0162	0.7122	0.8642	0.215	0.0309	0.0068
YEL025C	YEL025C	-0.1074	-1.3313	-0.7194	0.8654	0.0296	0.0071
YEL028W	YEL028W	0.5718	0.3117	0.4418	0.1839	0.0295	0.0067
YEL030W	ECM10	-0.3736	0.2838	-0.0449	0.4648	0.0304	0.007
YEL033W	YEL033W	1.3909	0.1148	0.7528	0.9023	0.0313	0.0073
YEL037C	RAD23	0.3776	0.3347	0.3561	0.0303	0.0309	0.007
YEL038W	UTR4	-0.7131	0.0844	-0.3144	0.564	0.0295	0.0066
YEL039C	CYC7	-0.2775	-0.5092	-0.3934	0.1638	0.0289	0.0063
YEL041W	YEL041W	0.3229	0.2877	0.3053	0.0249	0.0305	0.007
YEL042W	GDA1	-0.0902	0.0493	-0.0204	0.0986	0.0291	0.0069
YEL043W	YEL043W	1.0354	-0.8927	0.0714	1.3634	0.0299	0.0068
YEL045C	YEL045C	0.7633	0.2048	0.484	0.3949	0.0312	0.0076
YEL046C	GLY1	1.161	0.9531	1.0571	0.147	0.0315	0.0076
YEL047C	YEL047C	-0.4203	0.0293	-0.1955	0.3179	0.0304	0.0074
YEL048C	YEL048C	0.0472	0.1601	0.1036	0.0799	0.0304	0.0075
YEL049W	PAU2	-0.095	0.0486	-0.0232	0.1015	0.0302	0.007
YEL052W	AFG1	0.7877	-0.2761	0.2558	0.7522	0.0303	0.007
YEL053C	MAK10	0.8193	-0.5243	0.1475	0.9501	0.0301	0.0065
YEL054C	RPL12A	0.7479	0.5855	0.6667	0.1148	0.0295	0.0069
YEL056W	HAT2	0.5362	0.2589	0.3976	0.1961	0.0305	0.0067
YEL057C	YEL057C	-0.356	-0.2366	-0.2963	0.0844	0.0294	0.007
YEL059W	YEL059W	1.3619	-0.0356	0.6631	0.9881	0.0311	0.0074
YEL060C	PRB1	0.1027	0.9794	0.5411	0.6199	0.0307	0.0069
YEL061C	CIN8	-1.8656	-0.0272	-0.9464	1.2999	0.0288	0.0066
YEL062W	NPR2	1.19	0.4189	0.8044	0.5453	0.0313	0.0071
YEL063C	CAN1	0.3008	0.1018	0.2013	0.1407	0.0302	0.0069
YEL064C	AVT2	-0.0915	0.28	0.0942	0.2627	0.0306	0.007
YEL065W	SIT1	-0.1092	-0.3647	-0.237	0.1807	0.0301	0.007
YEL066W	HPA3	0.442	-0.0564	0.1928	0.3524	0.0312	0.0072
YEL067C	YEL067C	-0.3383	-0.2018	-0.27	0.0965	0.0303	0.0072
YEL068C	YEL068C	0.1252	0.0249	0.075	0.0709	0.0305	0.0073
YEL071W	DLD3	0.4393	-0.0263	0.2065	0.3292	0.0306	0.007
YEL072W	RMD6	-0.4721	-0.221	-0.3465	0.1775	0.0302	0.0074
YER001W	MNN1	-0.4661	0.9833	0.2586	1.0249	0.0309	0.0067
YER002W	NOP16	-0.2745	-0.1328	-0.2037	0.1002	0.0299	0.0069
YER005W	YND1	-0.2177	-0.9525	-0.5851	0.5196	0.0295	0.0067
YER007C-A	YER007C-A	0.4744	0.092	0.2832	0.2704	0.0305	0.0068
YER007W	PAC2	0.3358	0.4892	0.4125	0.1085	0.0306	0.0069
YER007W	PAC2	0.4353	0.2048	0.3201	0.163	0.0305	0.007
YER010C	YER010C	0.1915	-0.1298	0.0308	0.2272	0.0302	0.007
YER011W	TIR1	0.4171	-0.0292	0.194	0.3156	0.0304	0.0068
YER016W	BIM1	1.2828	0.3868	0.8348	0.6336	0.0305	0.0069
YER017C	AFG3	0.1449	1.2482	0.6966	0.7801	0.032	0.0078
YER019C-A	SBH2	-0.1148	0.0783	-0.0182	0.1366	0.0304	0.0073
YER019W	ISC1	0.1646	1.3326	0.7486	0.8259	0.033	0.0077
YER020W	GPA2	-0.156	-0.2064	-0.1812	0.0356	0.0298	0.0068
YER024W	YAT2	0.1053	0.8027	0.454	0.4931	0.0309	0.0068
YER027C	GAL83	-0.5266	0.0547	-0.236	0.411	0.0309	0.0069
YER028C	MIG3	0.4287	-0.0983	0.1652	0.3727	0.0307	0.0069
YER030W	YER030W	-0.138	-0.371	-0.2545	0.1647	0.03	0.007
YER032W	FIR1	-0.1392	0.3843	0.1226	0.3701	0.0308	0.0071
YER033C	ZRG8	0.6177	0.1473	0.3825	0.3326	0.0307	0.0068
YER034W	YER034W	-0.1458	0.0425	-0.0517	0.1332	0.0307	0.0072
YER035W	EDC2	0.1271	-0.0508	0.0381	0.1258	0.0302	0.0069
YER037W	PHM8	0.5075	0.4824	0.495	0.0178	0.0322	0.007
YER038W-A	FMP49	-0.3856	-0.5258	-0.4557	0.0991	0.0299	0.0069
YER039C	HVG1	0.7086	-0.0919	0.3083	0.566	0.0307	0.0069
YER039C-A	YER039C-A	1.8536	0.28	1.0668	1.1127	0.0309	0.007
YER040W	GLN3	-0.0848	-0.0499	-0.0674	0.0246	0.0304	0.0071
YER041W	YEN1	-0.3745	0.9016	0.2635	0.9023	0.0306	0.0067
YER042W	MXR1	-0.79	-0.1103	-0.4502	0.4806	0.0298	0.0067
YER044C-A	MEI4	0.132	0.0359	0.0839	0.068	0.0305	0.0072
YER045C	ACA1	-0.3471	-0.2516	-0.2994	0.0676	0.0297	0.0069
YER046W	SPO73	0.1327	0.1057	0.1192	0.0191	0.0305	0.007
YER046W-A	YER046W-A	0.5787	0.2528	0.4157	0.2304	0.0316	0.0072
YER047C	SAP1	0.582	0.3615	0.4717	0.1559	0.0313	0.007
YER048C	CAJ1	1.4581	0.3605	0.9093	0.7761	0.0309	0.0071
YER049W	YER049W	0.4689	0.2325	0.3507	0.1672	0.0301	0.007
YER050C	RSM18	1.3233	0.0161	0.6697	0.9244	0.0318	0.0069
YER051W	YER051W	0.1237	-0.1547	-0.0155	0.1969	0.0303	0.007
YER053C	YER053C	-0.2046	-0.4116	-0.3081	0.1464	0.0301	0.0067
YER054C	GIP2	0.125	0.1894	0.1572	0.0455	0.0313	0.0068
YER055C	HIS1	-0.4638	0.4222	-0.0208	0.6265	0.0302	0.0069
YER056C	FCY2	0.3727	-0.4107	-0.019	0.5539	0.0302	0.0067
YER056C-A	RPL34A	-0.5087	0.1958	-0.1564	0.4982	0.031	0.0069
YER057C	HMF1	-0.2172	0.1705	-0.0233	0.2742	0.0302	0.0069
YER058W	PET117	0.3336	-0.2946	0.0195	0.4442	0.0307	0.0068
YER059W	PCL6	-0.6182	0.5442	-0.037	0.8219	0.0301	0.007
YER060W	FCY21	0.4491	0.2446	0.3468	0.1446	0.0308	0.007
YER060W-A	FCY22	-0.5024	0.2662	-0.1181	0.5434	0.0302	0.0069
YER061C	CEM1	1.1196	0.6328	0.8762	0.3442	0.0307	0.0071
YER062C	HOR2	1.2594	1.1027	1.181	0.1108	0.0342	0.0069
YER063W	THO1	-0.022	0.0197	-0.0012	0.0294	0.03	0.007
YER064C	YER064C	1.5369	-0.4938	0.5215	1.436	0.0306	0.0065
YER065C	ICL1	-0.3332	-0.0366	-0.1849	0.2097	0.0298	0.007
YER066C-A	YER066C-A	-0.1315	0.0908	-0.0203	0.1572	0.0303	0.007
YER066W	YER066W	0.1777	0.5411	0.3594	0.257	0.0309	0.0071
YER067C-A	YER067C-A	0.5049	-1.0741	-0.2846	1.1166	0.0299	0.0068
YER067W	YER067W	0.5698	-0.1115	0.2292	0.4817	0.0303	0.0069
YER068C-A	YER068C-A	-0.1711	0.1672	-0.0019	0.2392	0.0304	0.0068
YER068W	MOT2	0.3776	-0.3721	0.0028	0.5301	0.0309	0.0072
YER069W	ARG5,6	-0.4661	-0.0565	-0.2613	0.2897	0.0303	0.0071
YER070W	RNR1	0.3152	0.2325	0.2738	0.0585	0.0305	0.007
YER071C	YER071C	0.4937	0.33	0.4118	0.1157	0.0304	0.0068
YER072W	VTC1	0.4233	0.3009	0.3621	0.0865	0.0312	0.0074
YER073W	ALD5	0.5333	0.3144	0.4238	0.1548	0.0307	0.007
YER074W	RPS24A	0.2152	-0.0357	0.0897	0.1774	0.0308	0.007
YER075C	PTP3	1.0983	-0.3305	0.3839	1.0104	0.0306	0.0068
YER078C	YER078C	0.7484	0.1625	0.4554	0.4143	0.0301	0.0066
YER079W	YER079W	0.2541	-0.1419	0.0561	0.2801	0.0305	0.0068
YER080W	FMP29	0.7382	0.0589	0.3986	0.4804	0.0305	0.0066
YER081W	SER3	-0.0057	0.1954	0.0948	0.1422	0.0308	0.0068
YER083C	RMD7	1.0949	1.0086	1.0517	0.0611	0.0326	0.0073
YER084W	YER084W	0.4684	0.9531	0.7107	0.3427	0.0305	0.0069
YER085C	YER085C	0.149	-0.685	-0.268	0.5897	0.0303	0.007
YER086W	ILV1	0.2456	0.3279	0.2868	0.0582	0.0306	0.0068
YER087C-A	YER087C-A	0.8698	-0.5385	0.1657	0.9958	0.0303	0.0069
YER088C	DOT6	0.9659	0.2652	0.6155	0.4955	0.0319	0.0069
YER089C	PTC2	-0.0524	-0.026	-0.0392	0.0187	0.0307	0.0068
YER090W	TRP2	0.7851	0.1279	0.4565	0.4647	0.0304	0.0069
YER091C	MET6	0.5333	0.177	0.3552	0.252	0.0305	0.007
YER091C-A	YER091C-A	0.3563	0.0989	0.2276	0.182	0.0305	0.0067
YER092W	IES5	-0.1798	-0.7803	-0.4801	0.4247	0.0298	0.0071
YER093C-A	YER093C-A	0.4658	-0.5408	-0.0375	0.7118	0.0298	0.0067
YER095W	RAD51	0.4502	0.0186	0.2344	0.3052	0.0308	0.0072
YER096W	SHC1	-0.2625	0.0833	-0.0896	0.2445	0.0298	0.0069
YER097W	YER097W	1.5833	-0.2809	0.6512	1.3182	0.0306	0.0067
YER098W	UBP9	-0.2861	0.2587	-0.0137	0.3853	0.0308	0.007
YER101C	AST2	-0.1648	0.6372	0.2362	0.5671	0.0303	0.0068
YER103W	SSA4	0.1902	-0.7619	-0.2859	0.6732	0.0314	0.007
YER106W	MAM1	0.2094	0.4772	0.3433	0.1894	0.0308	0.0071
YER108C	YER108C	0.9059	0.518	0.7119	0.2743	0.0311	0.0068
YER109C	FLO8	0.2158	-0.1514	0.0322	0.2596	0.0303	0.0069
YER109C	FLO8	0.5023	0.1771	0.3397	0.23	0.0305	0.007
YER110C	KAP123	1.933	1.4483	1.6907	0.3427	0.0339	0.0068
YER111C	SWI4	0.4005	0.3252	0.3629	0.0532	0.0316	0.0072
YER113C	YER113C	-0.6167	0.8971	0.1402	1.0704	0.0309	0.0071
YER114C	BOI2	0.0644	1.1382	0.6013	0.7593	0.0309	0.0068
YER115C	SPR6	-0.346	-0.3428	-0.3444	0.0023	0.0299	0.0068
YER116C	SLX8	-0.1059	-0.0995	-0.1027	0.0046	0.0301	0.0068
YER118C	SHO1	0.6298	0.1005	0.3652	0.3743	0.0305	0.0069
YER119C	AVT6	-0.4383	-0.1572	-0.2978	0.1988	0.0303	0.0072
YER120W	SCS2	1.2191	1.9485	1.5838	0.5158	0.0329	0.0075
YER121W	YER121W	0.2364	0.3431	0.2897	0.0754	0.0304	0.0071
YER123W	YCK3	1.0205	1.224	1.1223	0.1439	0.0327	0.007
YER124C	DSE1	0.4353	0.1012	0.2682	0.2363	0.0303	0.0069
YER128W	YER128W	1.1945	-0.0484	0.573	0.8789	0.0305	0.007
YER129W	PAK1	0.1426	0.1902	0.1664	0.0336	0.0311	0.0074
YER130C	YER130C	0.6522	0.3221	0.4871	0.2334	0.032	0.0068
YER131W	RPS26B	-0.6064	-0.062	-0.3342	0.3849	0.0297	0.0069
YER132C	PMD1	0.4912	-0.3243	0.0835	0.5766	0.0298	0.0067
YER134C	YER134C	0.1055	0.7026	0.404	0.4222	0.0309	0.0069
YER135C	YER135C	0.2562	0.3956	0.3259	0.0986	0.0309	0.0072
YER137C	YER137C	-0.1876	-0.132	-0.1598	0.0393	0.03	0.007
YER139C	YER139C	0.5912	0.4979	0.5445	0.066	0.0312	0.0071
YER140W	YER140W	-0.4385	0.0577	-0.1904	0.3509	0.0297	0.0067
YER141W	COX15	0.4756	-0.0631	0.2063	0.3809	0.031	0.0075
YER142C	MAG1	-0.2704	-0.1716	-0.221	0.0698	0.0296	0.0069
YER143W	DDI1	-0.743	-0.1688	-0.4559	0.406	0.0298	0.0069
YER144C	UBP5	0.5884	0.0743	0.3313	0.3636	0.0305	0.0069
YER145C	FTR1	0.5126	0.1705	0.3415	0.2419	0.0304	0.0069
YER149C	PEA2	-0.9415	-1.3813	-1.1614	0.3109	0.0287	0.0068
YER150W	SPI1	0.1192	-0.291	-0.0859	0.2901	0.0305	0.0072
YER151C	UBP3	-0.576	0.3129	-0.1315	0.6286	0.0298	0.0065
YER152C	YER152C	-0.4235	0.0095	-0.207	0.3062	0.0302	0.0071
YER153C	PET122	0.5601	-0.278	0.141	0.5927	0.0308	0.0068
YER154W	OXA1	0.1107	-0.541	-0.2151	0.4608	0.0306	0.0071
YER155C	BEM2	0.1691	-0.2512	-0.041	0.2972	0.0311	0.0084
YER156C	YER156C	1.1001	0.4275	0.7638	0.4756	0.0302	0.0067
YER158C	YER158C	0.3261	0.1077	0.2169	0.1544	0.0308	0.007
YER161C	SPT2	0.922	0.5463	0.7341	0.2657	0.0311	0.0071
YER162C	RAD4	1.1443	0.6519	0.8981	0.3481	0.0318	0.0073
YER163C	YER163C	0.374	-0.1992	0.0874	0.4053	0.0317	0.0072
YER164W	CHD1	0.247	0.2562	0.2516	0.0065	0.0308	0.0071
YER166W	DNF1	-0.1253	0.0868	-0.0193	0.15	0.0298	0.0069
YER167W	BCK2	-0.0125	-0.0689	-0.0407	0.0399	0.0297	0.0068
YER169W	RPH1	-0.3236	-0.1448	-0.2342	0.1264	0.0314	0.0072
YER170W	ADK2	-0.2485	0.2385	-0.005	0.3443	0.0307	0.007
YER173W	RAD24	0.2065	-0.0926	0.057	0.2115	0.0302	0.0068
YER174C	GRX4	1.0303	0.1154	0.5729	0.6469	0.0315	0.0071
YER175C	TMT1	1.1325	0.6747	0.9036	0.3237	0.0332	0.0064
YER176W	ECM32	-0.3271	-0.012	-0.1695	0.2228	0.0301	0.0071
YER177W	BMH1	0.5998	0.4379	0.5189	0.1144	0.0298	0.0067
YER178W	PDA1	0.1001	0.8252	0.4626	0.5127	0.0312	0.0072
YER179W	DMC1	-0.3788	0.2413	-0.0688	0.4384	0.0298	0.0067
YER180C	ISC10	-0.6601	-0.186	-0.423	0.3353	0.0294	0.0067
YER181C	YER181C	0.0049	-0.2096	-0.1023	0.1517	0.03	0.007
YER182W	FMP10	0.0992	-0.503	-0.2019	0.4258	0.0301	0.0069
YER183C	FAU1	0.5381	-0.3557	0.0912	0.632	0.0302	0.0068
YER184C	YER184C	-0.3339	-0.2817	-0.3078	0.0369	0.0299	0.0068
YER185W	YER185W	0.0536	-0.5546	-0.2505	0.4301	0.0297	0.0066
YER186C	YER186C	0.1637	-0.2433	-0.0398	0.2878	0.0304	0.0069
YER187W	YER187W	-0.2911	0.5222	0.1156	0.5751	0.0302	0.0068
YER188W	YER188W	0.3088	-0.1184	0.0952	0.3021	0.0302	0.0069
YFL001W	DEG1	-0.3496	-0.2463	-0.298	0.0731	0.0307	0.0076
YFL003C	MSH4	0.5217	0.7003	0.611	0.1263	0.0312	0.0073
YFL004W	VTC2	0.141	-0.1796	-0.0193	0.2267	0.0301	0.0065
YFL006W	YFL006W	0.1492	0.2306	0.1899	0.0575	0.0311	0.0071
YFL007W	BLM3	1.3348	1.3149	1.3249	0.0141	0.0307	0.0072
YFL010C	WWM1	0.5845	0.7102	0.6473	0.0889	0.0309	0.0069
YFL010W-A	AUA1	-0.002	0.0267	0.0124	0.0203	0.0307	0.0071
YFL011W	HXT10	0.444	0.1567	0.3003	0.2032	0.0306	0.0069
YFL012W	YFL012W	0.9811	-0.6864	0.1474	1.1791	0.0303	0.0072
YFL013C	IES1	-0.3239	0.5793	0.1277	0.6386	0.03	0.0071
YFL013W-A	YFL013W-A	-0.2368	-0.3815	-0.3092	0.1023	0.0293	0.007
YFL014W	HSP12	-0.4518	0.055	-0.1984	0.3584	0.03	0.007
YFL015C	YFL015C	0.0788	0.0225	0.0507	0.0398	0.0307	0.0072
YFL019C	YFL019C	0.9901	-0.0979	0.4461	0.7693	0.0306	0.0068
YFL020C	PAU5	0.2578	0.4502	0.354	0.1361	0.0303	0.0068
YFL021W	GAT1	0.3065	0.4543	0.3804	0.1045	0.0305	0.0071
YFL023W	BUD27	0.5611	0.6872	0.6241	0.0892	0.032	0.0073
YFL025C	BST1	0.3982	1.0087	0.7034	0.4317	0.0303	0.0066
YFL026W	STE2	0.0162	-0.0889	-0.0363	0.0743	0.0299	0.007
YFL027C	GYP8	0.3912	0.8365	0.6139	0.3149	0.0303	0.0067
YFL028C	CAF16	-0.1059	0.4597	0.1769	0.3999	0.0297	0.0071
YFL030W	AGX1	-0.0887	-0.0217	-0.0552	0.0474	0.0304	0.0068
YFL031W	HAC1	-0.2673	-0.5487	-0.408	0.199	0.0293	0.0066
YFL032W	YFL032W	-0.6245	-0.6617	-0.6431	0.0263	0.0293	0.0068
YFL033C	RIM15	0.4872	0.6481	0.5676	0.1138	0.0319	0.007
YFL034C-A	RPL22B	-0.0723	-0.0992	-0.0858	0.019	0.0301	0.0071
YFL034W	YFL034W	-0.4252	-0.275	-0.3501	0.1062	0.03	0.007
YFL035C-B	YFL035C-B	0.2543	0.0766	0.1654	0.1256	0.0308	0.0068
YFL036W	RPO41	0.6111	0.2363	0.4237	0.265	0.0314	0.007
YFL040W	YFL040W	-0.0928	0.0419	-0.0255	0.0952	0.0301	0.0066
YFL041W	FET5	-0.0659	-0.1925	-0.1292	0.0895	0.0303	0.0068
YFL042C	YFL042C	1.7146	0.3446	1.0296	0.9688	0.0315	0.007
YFL043C	YFL043C	0.332	0.5047	0.4183	0.1221	0.031	0.0068
YFL044C	YFL044C	-0.0869	0.1579	0.0355	0.1731	0.0302	0.007
YFL046W	FMP32	0.0511	0.4375	0.2443	0.2732	0.0305	0.0069
YFL047W	RGD2	0.1342	-0.0546	0.0398	0.1335	0.0302	0.0068
YFL048C	EMP47	-0.0779	-0.6614	-0.3696	0.4126	0.0296	0.0067
YFL049W	YFL049W	0.8171	-0.0885	0.3643	0.6404	0.0303	0.0069
YFL050C	ALR2	0.2555	0.0415	0.1485	0.1513	0.0303	0.0071
YFL051C	YFL051C	0.22	0.0303	0.1252	0.1342	0.03	0.0069
YFL052W	YFL052W	-0.7224	-0.2406	-0.4815	0.3406	0.0297	0.0069
YFL053W	DAK2	-0.554	-0.2856	-0.4198	0.1898	0.0295	0.0065
YFL054C	YFL054C	0.4642	-0.5473	-0.0415	0.7152	0.0302	0.0069
YFL055W	AGP3	0.3343	0.5118	0.423	0.1255	0.0313	0.0072
YFL056C	AAD6	-0.4073	-0.2698	-0.3386	0.0972	0.03	0.0068
YFL063W	YFL063W	0.2242	0.7695	0.4969	0.3855	0.0302	0.0069
YFR001W	LOC1	0.4689	0.177	0.323	0.2065	0.0305	0.007
YFR006W	YFR006W	0.0181	0.3661	0.1921	0.246	0.0303	0.007
YFR007W	YFR007W	0.1773	-0.3036	-0.0632	0.34	0.0301	0.0068
YFR008W	FAR7	0.1858	0.3859	0.2858	0.1415	0.03	0.0068
YFR009W	GCN20	0.0457	-0.2176	-0.086	0.1862	0.03	0.0068
YFR010W	UBP6	0.0584	-0.2683	-0.105	0.231	0.0298	0.0069
YFR011C	YFR011C	-0.1779	-0.1196	-0.1487	0.0412	0.0302	0.007
YFR012W	YFR012W	-0.6327	0.2247	-0.204	0.6063	0.0302	0.0069
YFR013W	IOC3	1.4266	-0.4168	0.5049	1.3035	0.0304	0.007
YFR014C	CMK1	-0.1303	0.343	0.1064	0.3346	0.0303	0.0068
YFR015C	GSY1	0.464	0.4413	0.4526	0.016	0.0309	0.0072
YFR016C	YFR016C	-0.494	-0.2233	-0.3587	0.1914	0.0302	0.007
YFR017C	YFR017C	-0.0591	-0.4215	-0.2403	0.2562	0.0303	0.0071
YFR018C	YFR018C	0.6847	0.6343	0.6595	0.0356	0.0322	0.007
YFR019W	FAB1	-0.1135	0.027	-0.0432	0.0994	0.0305	0.0071
YFR020W	YFR020W	0.4436	-0.0467	0.1984	0.3467	0.0293	0.0069
YFR021W	ATG18	-0.452	0.1749	-0.1386	0.4433	0.0303	0.0067
YFR022W	YFR022W	0.2671	0.0619	0.1645	0.1451	0.0303	0.0067
YFR023W	PES4	0.1939	0.6726	0.4332	0.3385	0.0308	0.007
YFR024C	YFR024C	0.742	0.0529	0.3975	0.4873	0.0299	0.0067
YFR024C-A	LSB3	-0.1837	0.0063	-0.0887	0.1344	0.0301	0.0069
YFR026C	YFR026C	-0.2978	0.5641	0.1331	0.6095	0.0307	0.0067
YFR030W	MET10	0.4689	0.2326	0.3508	0.1671	0.0305	0.007
YFR031C-A	RPL2A	0.1986	-0.152	0.0233	0.2479	0.0299	0.0067
YFR032C	YFR032C	0.0502	-0.5464	-0.2481	0.4219	0.0305	0.007
YFR032C-A	RPL29	0.5804	1.0459	0.8132	0.3291	0.0303	0.007
YFR033C	QCR6	0.9336	-0.1257	0.404	0.7491	0.0308	0.0069
YFR034C	PHO4	0.5875	0.2756	0.4316	0.2206	0.0309	0.007
YFR035C	YFR035C	0.016	0.1251	0.0706	0.0772	0.0307	0.007
YFR036W	CDC26	1.1607	-0.0654	0.5477	0.867	0.0303	0.0073
YFR038W	YFR038W	-0.3317	-1.5226	-0.9271	0.8421	0.0299	0.0067
YFR039C	YFR039C	0.1073	0.3166	0.2119	0.148	0.0305	0.0071
YFR040W	SAP155	-0.1572	-0.2101	-0.1837	0.0374	0.03	0.0068
YFR041C	YFR041C	0.5785	-0.033	0.2727	0.4324	0.0304	0.0069
YFR043C	YFR043C	0.125	0.1134	0.1192	0.0082	0.0303	0.0069
YFR044C	YFR044C	-0.732	-0.5478	-0.6399	0.1302	0.0303	0.0068
YFR045W	YFR045W	1.05	0.0636	0.5568	0.6975	0.0313	0.007
YFR046C	CNN1	0.0492	0.4483	0.2487	0.2822	0.0312	0.0073
YFR047C	BNA6	-0.2458	0.0274	-0.1092	0.1932	0.0303	0.0072
YFR048W	RMD8	0.7902	1.0669	0.9286	0.1956	0.031	0.0073
YFR049W	YMR31	0.2032	0.397	0.3001	0.137	0.0309	0.0072
YFR053C	HXK1	0.4826	0.3787	0.4306	0.0734	0.031	0.007
YFR054C	YFR054C	0.5026	0.177	0.3398	0.2302	0.0305	0.007
YFR055W	YFR055W	0.1905	-0.1381	0.0262	0.2323	0.0303	0.0068
YFR056C	YFR056C	0.4027	-0.3714	0.0157	0.5474	0.0304	0.0071
YFR057W	YFR057W	0.1492	-0.0258	0.0617	0.1238	0.0305	0.007
YGL002W	ERP6	0.6631	0.0089	0.336	0.4626	0.0306	0.007
YGL003C	CDH1	0.1059	0.9694	0.5377	0.6106	0.0316	0.0078
YGL004C	RPN14	0.3105	0.5391	0.4248	0.1616	0.0312	0.0067
YGL005C	COG7	0.0887	-0.1921	-0.0517	0.1985	0.0301	0.0068
YGL006W	PMC1	0.8054	-0.032	0.3867	0.5921	0.03	0.007
YGL007W	YGL007W	0.128	0.9892	0.5586	0.609	0.0302	0.007
YGL010W	YGL010W	-0.1027	0.1469	0.0221	0.1765	0.0306	0.0072
YGL012W	ERG4	-0.0811	-0.9709	-0.526	0.6292	0.0299	0.0073
YGL013C	PDR1	0.2334	-0.1853	0.024	0.2961	0.03	0.0067
YGL015C	YGL015C	0.3044	0.0239	0.1641	0.1983	0.0305	0.0071
YGL016W	KAP122	0.3642	0.4209	0.3926	0.0401	0.031	0.0067
YGL017W	ATE1	-0.1261	0.0885	-0.0188	0.1517	0.0301	0.0069
YGL019W	CKB1	0.4689	0.2325	0.3507	0.1672	0.0305	0.007
YGL021W	ALK1	-0.2268	-0.1758	-0.2013	0.036	0.0299	0.0068
YGL023C	PIB2	1.3391	1.3086	1.3239	0.0215	0.0339	0.0071
YGL024W	YGL024W	0.405	0.2048	0.3049	0.1415	0.0305	0.007
YGL025C	PGD1	-1.0542	-1.2574	-1.1558	0.1437	0.0288	0.0068
YGL026C	TRP5	0.3704	0.0298	0.2001	0.2409	0.0301	0.0068
YGL027C	CWH41	0.0392	-0.5184	-0.2396	0.3942	0.0302	0.0068
YGL028C	SCW11	-0.7771	-0.7207	-0.7489	0.0398	0.0288	0.0067
YGL029W	CGR1	0.5088	-0.3245	0.0922	0.5892	0.0295	0.0066
YGL031C	RPL24A	1.2841	-0.7461	0.269	1.4355	0.03	0.007
YGL032C	AGA2	0.5896	0.9015	0.7455	0.2206	0.0319	0.007
YGL033W	HOP2	-0.3622	0.5184	0.0781	0.6227	0.0331	0.0068
YGL034C	YGL034C	0.0483	0.5398	0.294	0.3476	0.0307	0.0071
YGL035C	MIG1	0.6026	1.2406	0.9216	0.4512	0.0313	0.0069
YGL036W	YGL036W	0.0344	0.19	0.1122	0.11	0.0304	0.0071
YGL037C	PNC1	0.5442	0.6311	0.5876	0.0614	0.0308	0.007
YGL039W	YGL039W	-0.682	0.1162	-0.2829	0.5644	0.0299	0.0067
YGL041C	YGL041C	0.5753	0.3417	0.4585	0.1652	0.0307	0.0069
YGL042C	YGL042C	0.0177	-0.3349	-0.1586	0.2494	0.0302	0.0071
YGL043W	DST1	-0.9032	-0.4429	-0.673	0.3255	0.0292	0.0068
YGL045W	RIM8	2.9769	1.9596	2.4683	0.7193	0.0347	0.0065
YGL046W	YGL046W	2.4942	1.6856	2.0899	0.5718	0.0343	0.0072
YGL049C	TIF4632	-0.3737	-0.7193	-0.5465	0.2444	0.0293	0.0071
YGL050W	YGL050W	0.0489	-0.275	-0.1131	0.229	0.03	0.0068
YGL051W	MST27	0.2712	-0.966	-0.3474	0.8749	0.0298	0.0065
YGL053W	PRM8	-0.0295	0.5484	0.2595	0.4087	0.0306	0.0069
YGL054C	ERV14	-0.9247	0.6392	-0.1428	1.1059	0.0299	0.0069
YGL056C	SDS23	0.3548	0.1902	0.2725	0.1164	0.0305	0.007
YGL057C	YGL057C	-0.5943	-0.891	-0.7427	0.2098	0.0294	0.007
YGL059W	YGL059W	0.0663	0.1579	0.1121	0.0648	0.0305	0.007
YGL060W	YBP2	-0.5704	0.5343	-0.0181	0.7811	0.0297	0.007
YGL062W	PYC1	0.1784	0.746	0.4622	0.4014	0.0306	0.0068
YGL063W	PUS2	-0.0681	0.3473	0.1396	0.2937	0.0298	0.0065
YGL064C	MRH4	0.0222	0.6918	0.357	0.4735	0.0303	0.0068
YGL066W	SGF73	0.5822	0.8442	0.7132	0.1853	0.0327	0.0072
YGL067W	NPY1	-0.9301	0.0866	-0.4218	0.7189	0.0297	0.0069
YGL072C	YGL072C	0.4914	0.0924	0.2919	0.2821	0.0318	0.0074
YGL076C	RPL7A	0.544	-0.172	0.186	0.5063	0.0305	0.0073
YGL077C	HNM1	-0.8352	0.0338	-0.4007	0.6145	0.0297	0.0068
YGL078C	DBP3	1.0239	0.246	0.635	0.5501	0.0309	0.007
YGL079W	YGL079W	-0.0619	0.1279	0.033	0.1342	0.0302	0.0067
YGL080W	FMP37	1.3003	-0.0567	0.6218	0.9595	0.0305	0.0066
YGL081W	YGL081W	0.911	0.5658	0.7384	0.2441	0.0307	0.0067
YGL082W	YGL082W	0.1365	-0.2518	-0.0576	0.2746	0.0304	0.0069
YGL083W	SCY1	0.2421	0.1777	0.2099	0.0455	0.0306	0.007
YGL084C	GUP1	-0.6378	-0.5667	-0.6023	0.0503	0.0297	0.008
YGL085W	YGL085W	1.2011	-0.161	0.52	0.9632	0.0304	0.0069
YGL086W	MAD1	-0.4193	-0.3544	-0.3868	0.0459	0.0299	0.007
YGL087C	MMS2	0.823	1.538	1.1805	0.5056	0.033	0.0069
YGL089C	MF(ALPHA)2	1.0085	-0.1326	0.4379	0.8069	0.0306	0.0067
YGL090W	LIF1	0.6367	0.4032	0.52	0.1651	0.0307	0.0065
YGL094C	PAN2	0.0761	0.1586	0.1174	0.0584	0.0305	0.0071
YGL096W	TOS8	0.0787	0.3645	0.2216	0.2021	0.0302	0.0067
YGL101W	YGL101W	0.5026	0.2048	0.3537	0.2106	0.0305	0.007
YGL104C	VPS73	0.6906	0.33	0.5103	0.255	0.0312	0.0069
YGL105W	ARC1	1.0481	0.4306	0.7394	0.4367	0.0314	0.0073
YGL107C	RMD9	1.2006	-0.1685	0.516	0.9681	0.0314	0.0068
YGL108C	YGL108C	0.4689	0.2306	0.3498	0.1685	0.0314	0.0072
YGL109W	YGL109W	0.8021	1.341	1.0715	0.381	0.0337	0.0072
YGL110C	CUE3	0.403	0.3828	0.3929	0.0143	0.0304	0.007
YGL114W	YGL114W	0.2754	0.008	0.1417	0.1891	0.0312	0.0069
YGL117W	YGL117W	-0.1328	-0.2156	-0.1742	0.0586	0.0304	0.007
YGL121C	GPG1	-0.0016	0.0256	0.012	0.0193	0.0301	0.0071
YGL124C	MON1	-0.7844	-0.5099	-0.6472	0.1941	0.0301	0.0068
YGL125W	MET13	0.4908	0.2338	0.3623	0.1818	0.0301	0.0067
YGL126W	SCS3	0.8689	0.3619	0.6154	0.3585	0.0302	0.0068
YGL127C	SOH1	0.5244	-0.0408	0.2418	0.3997	0.0309	0.0072
YGL129C	RSM23	-0.3164	0.3031	-0.0067	0.438	0.0306	0.007
YGL131C	SNT2	0.187	-0.0676	0.0597	0.18	0.0308	0.0071
YGL132W	YGL132W	0.4862	0.469	0.4776	0.0122	0.0327	0.0071
YGL133W	ITC1	-0.0572	0.0397	-0.0087	0.0685	0.0304	0.0069
YGL135W	RPL1B	0.8315	0.9343	0.8829	0.0727	0.032	0.0071
YGL136C	MRM2	0.8667	0.6104	0.7385	0.1812	0.0334	0.007
YGL138C	YGL138C	-0.624	0.0672	-0.2784	0.4887	0.0306	0.007
YGL139W	YGL139W	0.4405	0.1293	0.2849	0.22	0.0306	0.0067
YGL140C	YGL140C	0.0315	0.0589	0.0452	0.0194	0.0301	0.0065
YGL141W	HUL5	0.8589	-0.0649	0.397	0.6532	0.0297	0.0069
YGL143C	MRF1	0.3314	0.6502	0.4908	0.2255	0.0312	0.0071
YGL144C	ROG1	0.5918	-0.6096	-0.0089	0.8495	0.0304	0.0069
YGL146C	YGL146C	0.0172	0.0046	0.0109	0.0089	0.0306	0.0068
YGL147C	RPL9A	1.5915	0.8793	1.2354	0.5036	0.0311	0.0074
YGL148W	ARO2	-0.6707	-0.0525	-0.3616	0.4371	0.0305	0.0068
YGL149W	YGL149W	-0.2119	0.0027	-0.1046	0.1518	0.0302	0.0071
YGL151W	NUT1	-0.0779	0.5213	0.2217	0.4237	0.031	0.0069
YGL152C	YGL152C	-0.6716	0.0175	-0.3271	0.4873	0.0305	0.0066
YGL153W	PEX14	-0.1288	0.1129	-0.0079	0.171	0.0302	0.0069
YGL154C	LYS5	0.2973	-0.2469	0.0252	0.3848	0.0303	0.0072
YGL156W	AMS1	0.0443	-0.0076	0.0184	0.0367	0.0303	0.0068
YGL157W	YGL157W	1.0384	0.7595	0.8989	0.1972	0.0321	0.0071
YGL158W	RCK1	-0.0207	0.4551	0.2172	0.3365	0.0303	0.0069
YGL159W	YGL159W	-0.4481	-0.1042	-0.2761	0.2432	0.0302	0.0071
YGL160W	YGL160W	0.1493	-0.101	0.0241	0.177	0.0302	0.0067
YGL161C	YIP5	-0.0441	0.2401	0.098	0.2009	0.0308	0.0071
YGL162W	SUT1	0.1467	-0.032	0.0574	0.1263	0.0302	0.007
YGL163C	RAD54	0.431	0.926	0.6785	0.35	0.0317	0.0076
YGL164C	YRB30	-0.1475	0.2742	0.0633	0.2982	0.0307	0.0071
YGL165C	YGL165C	-0.0625	0.4636	0.2005	0.372	0.0304	0.0069
YGL166W	CUP2	0.3417	-0.098	0.1219	0.3109	0.0302	0.0069
YGL170C	SPO74	0.8609	0.3072	0.584	0.3915	0.0308	0.0068
YGL173C	KEM1	1.7258	1.095	1.4104	0.4461	0.0338	0.0072
YGL174W	BUD13	1.3571	0.1391	0.7481	0.8613	0.0311	0.0071
YGL175C	SAE2	0.9303	0.599	0.7647	0.2343	0.0318	0.0071
YGL176C	YGL176C	0.2291	-0.1611	0.034	0.2759	0.0303	0.0071
YGL177W	YGL177W	0.2488	0.6245	0.4367	0.2657	0.0307	0.0069
YGL179C	TOS3	-0.1978	0.2012	0.0017	0.2822	0.0303	0.0069
YGL180W	ATG1	0.1388	0.5863	0.3626	0.3164	0.0304	0.0069
YGL181W	GTS1	0.6826	-0.708	-0.0127	0.9833	0.0296	0.0067
YGL194C	HOS2	0.3124	-0.6064	-0.147	0.6497	0.0309	0.0071
YGL195W	GCN1	0.5023	0.2859	0.3941	0.1531	0.0305	0.007
YGL197W	MDS3	0.52	-1.2764	-0.3782	1.2702	0.0295	0.0062
YGL198W	YIP4	0.4962	-0.0842	0.206	0.4104	0.0303	0.0069
YGL199C	YGL199C	-0.4267	-0.3054	-0.366	0.0858	0.0309	0.0072
YGL200C	EMP24	0.4689	0.1771	0.323	0.2063	0.0305	0.007
YGL202W	ARO8	0.4355	0.2048	0.3202	0.1631	0.0305	0.007
YGL203C	KEX1	-0.6289	-0.204	-0.4164	0.3005	0.0298	0.0068
YGL205W	POX1	0.4857	0.7597	0.6227	0.1938	0.0315	0.007
YGL208W	SIP2	0.9527	1.2208	1.0868	0.1896	0.0306	0.007
YGL209W	MIG2	-0.1452	0.6308	0.2428	0.5488	0.0309	0.0072
YGL210W	YPT32	0.4355	0.1791	0.3073	0.1813	0.0305	0.007
YGL211W	YGL211W	-0.4128	-0.8072	-0.61	0.2789	0.0294	0.0065
YGL212W	VAM7	0.2764	-0.3921	-0.0579	0.4727	0.0299	0.0069
YGL213C	SKI8	1.4063	1.0132	1.2098	0.278	0.0317	0.007
YGL214W	YGL214W	0.5447	0.2488	0.3968	0.2092	0.0309	0.0072
YGL215W	CLG1	0.3792	-0.0493	0.165	0.303	0.0302	0.0069
YGL216W	KIP3	0.0254	0.2366	0.131	0.1493	0.0305	0.0071
YGL217C	YGL217C	-1.0574	0.5359	-0.2608	1.1266	0.0299	0.007
YGL218W	SRF1	0.9726	0.2819	0.6272	0.4884	0.031	0.0073
YGL219C	MDM34	1.3362	1.7294	1.5328	0.278	0.0305	0.0071
YGL221C	NIF3	0.5976	0.9279	0.7628	0.2336	0.0303	0.0067
YGL222C	EDC1	0.155	-0.098	0.0285	0.1789	0.0301	0.0065
YGL226C-A	OST5	0.4928	0.488	0.4904	0.0034	0.032	0.007
YGL226W	YGL226W	-0.1386	-0.0969	-0.1177	0.0295	0.0303	0.0071
YGL227W	VID30	0.9543	0.5191	0.7367	0.3077	0.031	0.0071
YGL228W	SHE10	0.0196	0.6356	0.3276	0.4356	0.0308	0.0068
YGL229C	SAP4	-0.305	0.1149	-0.0951	0.2969	0.0301	0.0068
YGL231C	YGL231C	0.0367	1.0589	0.5478	0.7228	0.0303	0.0071
YGL232W	TAN1	0.9945	1.0291	1.0118	0.0244	0.0312	0.0068
YGL235W	YGL235W	0.7835	0.2624	0.5229	0.3685	0.0307	0.0069
YGL236C	MTO1	0.4245	-0.5302	-0.0528	0.6751	0.0297	0.0068
YGL237C	HAP2	0.4355	0.2048	0.3202	0.1631	0.0305	0.007
YGL241W	KAP114	1.3124	0.4295	0.871	0.6242	0.0329	0.0078
YGL242C	YGL242C	0.4123	1.1074	0.7599	0.4915	0.0311	0.0068
YGL243W	TAD1	-0.0753	0.3146	0.1197	0.2757	0.0306	0.0072
YGL244W	RTF1	-0.5126	-0.3706	-0.4416	0.1004	0.0303	0.0075
YGL246C	RAI1	1.3119	-0.9579	0.177	1.605	0.03	0.0067
YGL248W	PDE1	0.6906	0.2958	0.4932	0.2792	0.03	0.0064
YGL249W	ZIP2	-0.0481	-0.1756	-0.1118	0.0902	0.0306	0.007
YGL250W	YGL250W	0.3232	0.3512	0.3372	0.0198	0.0321	0.0074
YGL251C	HFM1	0.4362	0.2778	0.357	0.112	0.0308	0.0071
YGL252C	RTG2	-0.602	-0.5288	-0.5654	0.0518	0.0315	0.0072
YGL253W	HXK2	0.3611	1.2529	0.807	0.6306	0.031	0.0071
YGL254W	FZF1	0.2058	0.1572	0.1815	0.0343	0.0311	0.0071
YGL255W	ZRT1	0.3734	-0.1561	0.1086	0.3744	0.0314	0.0069
YGL256W	ADH4	0.7321	0.6789	0.7055	0.0376	0.0299	0.0069
YGL257C	MNT2	0.0543	0.0447	0.0495	0.0068	0.0308	0.0069
YGL258W	VEL1	1.3919	0.5618	0.9768	0.587	0.0313	0.007
YGL259W	YPS5	0.1931	-0.2426	-0.0248	0.3081	0.03	0.0068
YGL260W	YGL260W	-0.4081	0.7931	0.1925	0.8494	0.0301	0.007
YGL261C	YGL261C	0.0523	0.9121	0.4822	0.608	0.0298	0.0069
YGL262W	YGL262W	0.7966	0.1738	0.4852	0.4404	0.0304	0.0071
YGL263W	COS12	0.1457	-0.6079	-0.2311	0.5329	0.0302	0.0071
YGR001C	YGR001C	1.2894	0.8042	1.0468	0.3431	0.0308	0.007
YGR003W	CUL3	0.117	-0.0753	0.0209	0.136	0.0304	0.007
YGR004W	YGR004W	-0.6033	-0.9577	-0.7805	0.2506	0.0292	0.007
YGR007W	MUQ1	0.4928	-0.491	0.0009	0.6956	0.0304	0.007
YGR008C	STF2	1.8616	0.3012	1.0814	1.1034	0.0308	0.007
YGR010W	NMA2	1.3844	-0.5917	0.3964	1.3973	0.0302	0.0066
YGR011W	YGR011W	-0.187	-0.333	-0.26	0.1033	0.0296	0.0071
YGR012W	YGR012W	-0.4381	0.1364	-0.1508	0.4062	0.0297	0.0068
YGR014W	MSB2	0.0361	0.0584	0.0472	0.0157	0.0294	0.0067
YGR015C	YGR015C	0.4698	0.3773	0.4235	0.0654	0.0304	0.0067
YGR016W	YGR016W	1.517	0.2199	0.8684	0.9172	0.03	0.0064
YGR017W	YGR017W	-0.2223	0.6076	0.1927	0.5868	0.0309	0.0067
YGR018C	YGR018C	0.8667	-0.0953	0.3857	0.6803	0.0298	0.0067
YGR019W	UGA1	0.1509	-0.0075	0.0717	0.112	0.0307	0.0069
YGR021W	YGR021W	0.8367	0.9553	0.896	0.0838	0.0305	0.0068
YGR022C	YGR022C	-0.3953	-0.0316	-0.2134	0.2572	0.0293	0.0065
YGR023W	MTL1	0.0675	0.401	0.2343	0.2358	0.0297	0.0065
YGR025W	YGR025W	-0.3288	0.9287	0.2999	0.8892	0.0304	0.0066
YGR026W	YGR026W	0.1475	0.5093	0.3284	0.2558	0.0305	0.007
YGR028W	MSP1	-0.1239	0.5533	0.2147	0.4788	0.0306	0.007
YGR031W	YGR031W	0.4521	0.3005	0.3763	0.1072	0.0307	0.007
YGR032W	GSC2	-0.1313	-0.1543	-0.1428	0.0163	0.0302	0.0068
YGR033C	FMP17	1.3004	0.019	0.6597	0.906	0.0302	0.0068
YGR034W	RPL26B	0.1185	-0.2328	-0.0571	0.2484	0.0294	0.0065
YGR035C	YGR035C	0.1677	0.2646	0.2161	0.0685	0.0304	0.0067
YGR036C	CAX4	-0.1232	-0.0341	-0.0786	0.063	0.03	0.0072
YGR037C	ACB1	-0.2845	0.0909	-0.0968	0.2654	0.03	0.0069
YGR038W	ORM1	0.183	-0.2014	-0.0092	0.2718	0.0303	0.0071
YGR039W	YGR039W	0.4964	-0.0406	0.2279	0.3797	0.0304	0.0068
YGR040W	KSS1	0.5479	0.1872	0.3676	0.2551	0.0305	0.0068
YGR041W	BUD9	-0.2936	0.1092	-0.0922	0.2848	0.0301	0.0068
YGR042W	YGR042W	1.4722	-0.1019	0.6851	1.1131	0.0306	0.0071
YGR043C	YGR043C	0.9449	0.2996	0.6223	0.4563	0.0305	0.0069
YGR044C	RME1	1.5926	0.6884	1.1405	0.6393	0.0314	0.0069
YGR045C	YGR045C	0.1343	-0.0727	0.0308	0.1463	0.0302	0.0071
YGR049W	SCM4	0.0065	-0.0357	-0.0146	0.0298	0.0304	0.0071
YGR050C	YGR050C	1.0182	0.4812	0.7497	0.3797	0.0318	0.0075
YGR051C	YGR051C	0.0018	0.1538	0.0778	0.1075	0.0305	0.0069
YGR052W	FMP48	0.2064	0.1754	0.1909	0.0219	0.0307	0.0071
YGR053C	YGR053C	0.3524	0.212	0.2822	0.0993	0.0305	0.0068
YGR054W	YGR054W	0.3757	1.2199	0.7978	0.597	0.0311	0.0068
YGR055W	MUP1	0.8564	1.7858	1.3211	0.6572	0.0328	0.007
YGR056W	RSC1	1.4256	0.0979	0.7617	0.9388	0.0314	0.0068
YGR058W	YGR058W	3.1835	1.4927	2.3381	1.1956	0.0329	0.0074
YGR059W	SPR3	0.4848	-0.3644	0.0602	0.6005	0.0314	0.0069
YGR061C	ADE6	1.0074	1.687	1.3472	0.4806	0.0326	0.0073
YGR062C	COX18	0.067	0.5632	0.3151	0.3508	0.032	0.0076
YGR063C	SPT4	0.4777	0.4638	0.4707	0.0098	0.0306	0.0072
YGR064W	YGR064W	0.7206	-0.6737	0.0235	0.9859	0.0285	0.0062
YGR066C	YGR066C	1.745	-0.3998	0.6726	1.5166	0.0301	0.0069
YGR067C	YGR067C	-1.131	-0.0622	-0.5966	0.7558	0.0299	0.0069
YGR068C	YGR068C	0.8397	0.684	0.7619	0.1101	0.0309	0.0068
YGR069W	YGR069W	-0.0386	0.0688	0.0151	0.0759	0.0309	0.0071
YGR070W	ROM1	0.857	0.1065	0.4817	0.5307	0.0312	0.007
YGR071C	YGR071C	0.8335	0.0107	0.4221	0.5818	0.0306	0.007
YGR072W	UPF3	0.918	1.1049	1.0115	0.1322	0.0312	0.0068
YGR076C	MRPL25	1.6151	1.8673	1.7412	0.1783	0.033	0.0071
YGR077C	PEX8	0.3982	-0.0219	0.1882	0.297	0.0302	0.0069
YGR078C	PAC10	0.7829	-0.6536	0.0646	1.0157	0.0298	0.0064
YGR079W	YGR079W	0.3904	-0.2589	0.0657	0.4591	0.0306	0.007
YGR080W	TWF1	-0.7789	0.0868	-0.346	0.6122	0.0304	0.007
YGR081C	SLX9	0.6543	0.3362	0.4953	0.2249	0.0305	0.0068
YGR084C	MRP13	1.2	0.2545	0.7272	0.6686	0.0309	0.0069
YGR085C	RPL11B	0.7365	-0.0763	0.3301	0.5747	0.0296	0.0062
YGR086C	PIL1	-0.1921	0.1871	-0.0025	0.2681	0.0304	0.0074
YGR087C	PDC6	0.3031	0.1169	0.21	0.1316	0.0312	0.0068
YGR088W	CTT1	0.5481	0.2081	0.3781	0.2404	0.0305	0.007
YGR089W	NNF2	0.2117	0.2169	0.2143	0.0037	0.0304	0.0068
YGR092W	DBF2	0.617	1.1186	0.8678	0.3547	0.0328	0.0072
YGR093W	YGR093W	0.4796	0.4041	0.4419	0.0534	0.0295	0.0071
YGR096W	TPC1	-0.3629	0.3747	0.0059	0.5216	0.031	0.0076
YGR097W	ASK10	0.4017	0.177	0.2893	0.1589	0.0313	0.0072
YGR100W	MDR1	1.4558	0.5151	0.9855	0.6652	0.0302	0.0069
YGR104C	SRB5	-1.0915	-0.7698	-0.9307	0.2275	0.0298	0.0083
YGR106C	YGR106C	0.1213	-0.0608	0.0303	0.1287	0.0308	0.007
YGR107W	YGR107W	1.0365	0.5765	0.8065	0.3252	0.032	0.0074
YGR108W	CLB1	0.6922	0.2963	0.4943	0.28	0.0313	0.0072
YGR109C	CLB6	1.2393	0.167	0.7031	0.7582	0.0312	0.0068
YGR110W	YGR110W	0.4296	1.1041	0.7669	0.477	0.0309	0.007
YGR111W	YGR111W	1.7104	1.6311	1.6707	0.0561	0.0313	0.0073
YGR112W	SHY1	0.2885	-0.1377	0.0754	0.3014	0.0313	0.0069
YGR117C	YGR117C	0.1354	-0.0319	0.0518	0.1183	0.0303	0.0074
YGR118W	RPS23A	0.2321	0.0159	0.124	0.1529	0.0306	0.0072
YGR121C	MEP1	-0.4965	-0.1843	-0.3404	0.2208	0.0299	0.0069
YGR122C-A	YGR122C-A	0.0476	0.261	0.1543	0.1509	0.0305	0.0069
YGR122W	YGR122W	1.1255	0.661	0.8932	0.3285	0.0321	0.0073
YGR123C	PPT1	-0.5473	0.5364	-0.0054	0.7663	0.0304	0.0068
YGR124W	ASN2	0.0532	0.1066	0.0799	0.0377	0.0303	0.0069
YGR125W	YGR125W	0.194	0.1908	0.1924	0.0022	0.0306	0.0069
YGR126W	YGR126W	0.1352	-0.2685	-0.0666	0.2855	0.0303	0.0068
YGR127W	YGR127W	-0.4705	0.0134	-0.2285	0.3422	0.0304	0.007
YGR129W	SYF2	0.7827	0.1634	0.473	0.4379	0.032	0.0072
YGR130C	YGR130C	0.8722	0.1728	0.5225	0.4946	0.0309	0.0068
YGR131W	YGR131W	0.384	-0.2231	0.0804	0.4293	0.0303	0.0072
YGR132C	PHB1	0.4909	0.3077	0.3993	0.1295	0.0309	0.0071
YGR133W	PEX4	-0.0964	-0.0336	-0.065	0.0444	0.0306	0.0071
YGR134W	CAF130	0.2159	0.2543	0.2351	0.0272	0.0306	0.0069
YGR135W	PRE9	0.4987	0.4131	0.4559	0.0606	0.0313	0.0069
YGR136W	LSB1	0.9379	-0.2793	0.3293	0.8606	0.0307	0.007
YGR137W	YGR137W	0.0164	-0.2005	-0.0921	0.1534	0.0303	0.0072
YGR138C	TPO2	0.3046	0.1569	0.2308	0.1044	0.0305	0.0069
YGR139W	YGR139W	0.4384	0.2048	0.3216	0.1652	0.0305	0.007
YGR141W	VPS62	0.4654	-0.4516	0.0069	0.6485	0.0305	0.007
YGR142W	BTN2	0.5361	0.6826	0.6094	0.1036	0.0309	0.007
YGR143W	SKN1	0.8818	0.3321	0.6069	0.3887	0.0301	0.0068
YGR144W	THI4	0.4399	0.1057	0.2728	0.2363	0.0308	0.007
YGR146C	YGR146C	0.6257	-0.0202	0.3027	0.4567	0.0307	0.0071
YGR148C	RPL24B	0.1785	-0.2979	-0.0597	0.3369	0.0308	0.0069
YGR149W	YGR149W	0.1856	0.0724	0.129	0.08	0.0306	0.0069
YGR150C	YGR150C	0.5017	1.2861	0.8939	0.5546	0.0317	0.007
YGR151C	YGR151C	0.0735	-0.174	-0.0502	0.175	0.0308	0.0067
YGR152C	RSR1	-0.1804	-0.0098	-0.0951	0.1207	0.031	0.0071
YGR153W	YGR153W	0.6657	0.0691	0.3674	0.4218	0.0306	0.0069
YGR154C	YGR154C	0.3765	0.1921	0.2843	0.1303	0.0307	0.0069
YGR155W	CYS4	2.5966	1.6009	2.0988	0.7041	0.0341	0.0075
YGR157W	CHO2	0.4607	0.0492	0.2549	0.2909	0.0309	0.0067
YGR159C	NSR1	1.0291	1.8185	1.4238	0.5582	0.0325	0.0072
YGR160W	YGR160W	0.0252	1.2166	0.6209	0.8424	0.0305	0.0071
YGR161C	RTS3	0.2117	0.145	0.1783	0.0471	0.0306	0.0069
YGR163W	GTR2	-0.1573	-0.9235	-0.5404	0.5417	0.0299	0.007
YGR164W	YGR164W	0.4161	0.2031	0.3096	0.1506	0.0311	0.0068
YGR165W	MRPS35	0.5821	0.2548	0.4184	0.2315	0.031	0.0072
YGR166W	KRE11	0.0744	-0.2817	-0.1036	0.2518	0.0303	0.0068
YGR168C	YGR168C	-0.3616	-0.1933	-0.2774	0.119	0.03	0.007
YGR169C	PUS6	0.2089	-0.292	-0.0416	0.3542	0.0302	0.0069
YGR170W	PSD2	0.0509	-0.2891	-0.1191	0.2404	0.0307	0.0069
YGR171C	MSM1	0.9097	0.5117	0.7107	0.2814	0.0316	0.007
YGR173W	GIR1	-0.4173	0.1015	-0.1579	0.3668	0.0303	0.007
YGR174C	CBP4	0.2226	0.4821	0.3524	0.1835	0.0316	0.007
YGR176W	YGR176W	0.1296	0.099	0.1143	0.0216	0.0302	0.007
YGR177C	ATF2	-1.2451	-0.5907	-0.9179	0.4627	0.03	0.007
YGR178C	PBP1	0.3612	-0.3813	-0.01	0.525	0.0299	0.007
YGR181W	TIM13	0.1069	-0.0999	0.0035	0.1462	0.0305	0.007
YGR182C	YGR182C	-0.3739	0.6732	0.1497	0.7404	0.0306	0.0072
YGR183C	QCR9	-0.1932	-0.3979	-0.2956	0.1447	0.0312	0.007
YGR184C	UBR1	0.6751	0.0117	0.3434	0.4691	0.0305	0.0069
YGR187C	HGH1	0.2386	0.8452	0.5419	0.4289	0.0308	0.0069
YGR188C	BUB1	-0.4017	0.174	-0.1139	0.4071	0.0301	0.007
YGR189C	CRH1	0.171	0.005	0.088	0.1174	0.0304	0.007
YGR192C	TDH3	-0.5268	0.6327	0.0529	0.8199	0.0305	0.0066
YGR193C	PDX1	0.0744	0.2359	0.1552	0.1142	0.0309	0.007
YGR194C	XKS1	0.0094	-0.7377	-0.3642	0.5283	0.0303	0.0068
YGR196C	FYV8	0.64	0.0156	0.3278	0.4415	0.0306	0.0071
YGR199W	PMT6	0.0605	0.1529	0.1067	0.0653	0.0307	0.007
YGR200C	ELP2	-0.0874	-0.1347	-0.111	0.0334	0.0303	0.0069
YGR201C	YGR201C	-0.2872	-0.3584	-0.3228	0.0504	0.0302	0.0068
YGR202C	PCT1	-0.3965	-0.2423	-0.3194	0.109	0.0299	0.0069
YGR203W	YGR203W	0.3992	0.5761	0.4876	0.1251	0.0305	0.0068
YGR204W	ADE3	0.4365	-0.0011	0.2177	0.3094	0.0303	0.0072
YGR205W	YGR205W	0.1327	0.2212	0.1769	0.0626	0.0305	0.0071
YGR206W	YGR206W	0.171	-0.356	-0.0925	0.3727	0.0303	0.007
YGR207C	YGR207C	0.3652	0.0536	0.2094	0.2204	0.0304	0.007
YGR208W	SER2	0.2956	-0.1305	0.0826	0.3013	0.0304	0.0071
YGR209C	TRX2	-0.5144	-0.4036	-0.459	0.0784	0.0301	0.007
YGR210C	YGR210C	1.0621	-0.0035	0.5293	0.7535	0.0309	0.007
YGR212W	YGR212W	-0.0302	0.1678	0.0688	0.14	0.0308	0.0068
YGR213C	RTA1	-0.8511	0.893	0.021	1.2332	0.0307	0.0072
YGR214W	RPS0A	1.3486	0.455	0.9018	0.6319	0.0308	0.0067
YGR215W	RSM27	0.1171	-0.0275	0.0448	0.1023	0.0308	0.0072
YGR220C	MRPL9	0.6758	-0.284	0.1959	0.6787	0.0309	0.0069
YGR221C	TOS2	0.7454	-0.1526	0.2964	0.635	0.0308	0.0068
YGR223C	YGR223C	-0.196	0.2478	0.0259	0.3138	0.03	0.0072
YGR224W	AZR1	0.2694	0.4273	0.3484	0.1116	0.0311	0.0071
YGR225W	AMA1	-0.0162	-0.3705	-0.1934	0.2505	0.0299	0.0069
YGR226C	YGR226C	0.317	0.0869	0.202	0.1627	0.0303	0.0072
YGR227W	DIE2	-0.1109	-1.0528	-0.5819	0.666	0.0292	0.0066
YGR228W	YGR228W	-0.8116	-0.1299	-0.4708	0.4821	0.0303	0.007
YGR229C	SMI1	0.0545	-0.0434	0.0055	0.0692	0.0309	0.0074
YGR230W	BNS1	0.5211	0.048	0.2846	0.3345	0.0306	0.007
YGR231C	PHB2	0.364	0.6853	0.5247	0.2272	0.0311	0.0069
YGR232W	NAS6	-0.1865	0.3386	0.0761	0.3713	0.0299	0.0067
YGR233C	PHO81	0.5026	0.1052	0.3039	0.281	0.0307	0.007
YGR234W	YHB1	0.1048	-0.7184	-0.3068	0.5821	0.0303	0.0068
YGR235C	YGR235C	0.6063	0.2373	0.4218	0.261	0.0308	0.0069
YGR236C	SPG1	-0.1166	-0.0087	-0.0627	0.0763	0.0304	0.0071
YGR237C	YGR237C	0.3986	-0.0064	0.1961	0.2864	0.0309	0.007
YGR238C	KEL2	1.5069	0.1345	0.8207	0.9704	0.0317	0.0075
YGR239C	PEX21	0.5386	0.0525	0.2955	0.3437	0.0306	0.0071
YGR240C	PFK1	1.7954	0.9567	1.376	0.5931	0.0317	0.0074
YGR241C	YAP1802	-0.4836	0.6505	0.0834	0.802	0.0306	0.0068
YGR242W	YGR242W	-0.6964	-0.3684	-0.5324	0.2319	0.0303	0.007
YGR243W	FMP43	0.0557	0.2687	0.1622	0.1506	0.0307	0.0072
YGR244C	LSC2	0.5963	-0.1356	0.2304	0.5176	0.0302	0.0066
YGR247W	CPD1	1.3423	-0.0178	0.6623	0.9617	0.0306	0.007
YGR249W	MGA1	0.6919	0.3452	0.5186	0.2451	0.0308	0.0072
YGR250C	YGR250C	-0.1368	0.6858	0.2745	0.5817	0.0304	0.0069
YGR254W	ENO1	0.8734	-0.2263	0.3235	0.7776	0.0306	0.0068
YGR256W	GND2	-0.0942	-0.1942	-0.1442	0.0707	0.03	0.0068
YGR258C	RAD2	-0.3869	0.2114	-0.0878	0.4231	0.0302	0.007
YGR259C	YGR259C	0.459	0.1191	0.2891	0.2403	0.0306	0.0069
YGR260W	TNA1	0.345	-0.1504	0.0973	0.3503	0.0302	0.0068
YGR261C	APL6	0.3506	0.3646	0.3576	0.0099	0.0309	0.0072
YGR263C	YGR263C	0.6493	0.2538	0.4515	0.2796	0.0315	0.0068
YGR266W	YGR266W	0.2506	0.1115	0.1811	0.0984	0.0305	0.007
YGR268C	HUA1	1.3845	-0.2521	0.5662	1.1573	0.0308	0.0069
YGR270W	YTA7	0.04	0.3024	0.1712	0.1856	0.0308	0.0071
YGR271W	SLH1	0.2535	0.0928	0.1731	0.1136	0.0304	0.007
YGR273C	YGR273C	1.4928	0.759	1.1259	0.5189	0.0304	0.007
YGR275W	RTT102	0.3408	-0.3633	-0.0113	0.4979	0.0304	0.0068
YGR276C	RNH70	0.2463	-0.0766	0.0849	0.2283	0.0312	0.0069
YGR279C	SCW4	0.0917	-0.5543	-0.2313	0.4568	0.0302	0.0071
YGR281W	YOR1	0.0622	0.2943	0.1782	0.1641	0.0304	0.0069
YGR282C	BGL2	-0.0192	-0.2212	-0.1202	0.1429	0.03	0.0069
YGR283C	YGR283C	0.1662	-0.1744	-0.0041	0.2408	0.0298	0.0066
YGR284C	ERV29	0.1685	0.0047	0.0866	0.1158	0.0304	0.0069
YGR285C	ZUO1	0.4689	0.1236	0.2963	0.2442	0.0314	0.0073
YGR286C	BIO2	0.6547	0.0331	0.3439	0.4395	0.0308	0.0069
YGR287C	YGR287C	0.4097	-0.4841	-0.0372	0.632	0.03	0.0068
YGR288W	MAL13	-0.3051	-0.0837	-0.1944	0.1566	0.0296	0.0067
YGR289C	MAL11	0.4855	-0.0134	0.2361	0.3528	0.0306	0.0072
YGR290W	YGR290W	0.0123	-0.0005	0.0059	0.0091	0.0301	0.0069
YGR291C	YGR291C	-0.246	-0.0885	-0.1673	0.1114	0.0304	0.0071
YGR292W	MAL12	-0.1553	0.0042	-0.0756	0.1128	0.0303	0.007
YGR295C	COS6	-0.4915	-0.3908	-0.4411	0.0712	0.03	0.0068
YHL002W	HSE1	-0.0915	0.1963	0.0524	0.2035	0.0302	0.0066
YHL003C	LAG1	0.084	-0.146	-0.031	0.1627	0.0306	0.0071
YHL005C	YHL005C	0.4382	0.1322	0.2852	0.2163	0.0298	0.0069
YHL006C	SHU1	0.7177	0.5154	0.6166	0.1431	0.0307	0.007
YHL007C	STE20	0.3949	0.2897	0.3423	0.0744	0.0313	0.007
YHL008C	YHL008C	0.543	-0.3569	0.093	0.6363	0.0315	0.0074
YHL009C	YAP3	0.8701	-0.2915	0.2893	0.8214	0.0303	0.0068
YHL010C	YHL010C	0.4689	0.2326	0.3508	0.1671	0.0305	0.0069
YHL011C	PRS3	-0.6977	-0.5078	-0.6027	0.1343	0.0293	0.0071
YHL012W	YHL012W	0.8971	-0.3861	0.2555	0.9074	0.0299	0.0065
YHL013C	YHL013C	0.4166	0.1548	0.2857	0.1851	0.03	0.0071
YHL014C	YLF2	0.6432	0.1511	0.3972	0.348	0.0304	0.007
YHL016C	DUR3	-0.1005	0.0726	-0.0139	0.1224	0.0304	0.007
YHL017W	YHL017W	0.3318	-0.1959	0.0679	0.3732	0.0305	0.0071
YHL019C	APM2	0.5024	0.0498	0.2761	0.32	0.0301	0.007
YHL020C	OPI1	-0.2574	-0.1821	-0.2197	0.0533	0.0283	0.0066
YHL021C	FMP12	1.8528	1.1831	1.5179	0.4735	0.0306	0.0068
YHL022C	SPO11	0.503	0.2182	0.3606	0.2014	0.0311	0.0075
YHL023C	RMD11	1.0005	0.2435	0.622	0.5353	0.0305	0.0069
YHL024W	RIM4	0.1278	0.4904	0.3091	0.2564	0.0299	0.0067
YHL026C	YHL026C	0.4355	0.2325	0.334	0.1436	0.0305	0.007
YHL027W	RIM101	1.7961	1.6683	1.7322	0.0904	0.0341	0.0069
YHL028W	WSC4	0.5123	0.4031	0.4577	0.0772	0.0321	0.0071
YHL029C	YHL029C	0.5094	-0.2952	0.1071	0.5689	0.0306	0.007
YHL030W	ECM29	0.5556	0.9565	0.756	0.2835	0.0319	0.007
YHL031C	GOS1	0.0715	-0.6077	-0.2681	0.4802	0.029	0.0068
YHL032C	GUT1	-0.3102	0.0365	-0.1369	0.2451	0.0317	0.0072
YHL033C	RPL8A	1.5019	0.4709	0.9864	0.729	0.0308	0.0069
YHL034C	SBP1	-0.0552	0.2341	0.0894	0.2046	0.0302	0.0072
YHL035C	VMR1	0.2348	0.5949	0.4148	0.2546	0.0308	0.0069
YHL036W	MUP3	0.4395	0.5358	0.4876	0.0681	0.0313	0.0073
YHL037C	YHL037C	1.7374	0.9359	1.3367	0.5668	0.0314	0.0071
YHL038C	CBP2	0.8372	-0.4863	0.1754	0.9358	0.031	0.0071
YHL039W	YHL039W	0.3334	0.2353	0.2844	0.0693	0.0304	0.007
YHL040C	ARN1	-0.3929	1.42	0.5135	1.2819	0.032	0.0068
YHL041W	YHL041W	0.3057	-0.1111	0.0973	0.2947	0.0308	0.0069
YHL042W	YHL042W	0.9427	0.211	0.5768	0.5174	0.0316	0.0074
YHL043W	ECM34	0.6787	0.2741	0.4764	0.2861	0.031	0.0071
YHL045W	YHL045W	0.0831	0.0379	0.0605	0.032	0.0306	0.0069
YHL046C	YHL046C	0.8056	0.2245	0.515	0.4109	0.0312	0.0071
YHL047C	ARN2	0.7509	0.6591	0.705	0.0649	0.0321	0.0074
YHR001W-A	QCR10	0.7472	-0.3718	0.1877	0.7912	0.0304	0.0073
YHR003C	YHR003C	-0.4928	0.3168	-0.088	0.5725	0.0306	0.0067
YHR004C	NEM1	0.3906	0.709	0.5498	0.2252	0.0308	0.0066
YHR005C	GPA1	-0.5538	0.0205	-0.2667	0.4061	0.0304	0.0068
YHR006W	STP2	-0.4512	-0.9722	-0.7117	0.3684	0.0298	0.0068
YHR009C	YHR009C	-0.349	-0.1761	-0.2626	0.1223	0.0301	0.0068
YHR011W	DIA4	3.7814	3.6924	3.7369	0.063	0.0372	0.0067
YHR012W	VPS29	-0.0071	-0.0773	-0.0422	0.0497	0.0304	0.0066
YHR014W	SPO13	0.5026	0.2048	0.3537	0.2106	0.0309	0.0073
YHR015W	MIP6	0.7596	0.4099	0.5847	0.2473	0.0319	0.0073
YHR016C	YSC84	0.4689	0.2326	0.3508	0.1671	0.0301	0.007
YHR017W	YSC83	0.1927	-0.7384	-0.2729	0.6584	0.03	0.0068
YHR018C	ARG4	0.4811	0.8499	0.6655	0.2608	0.0312	0.0069
YHR021W-A	ECM12	-0.4266	0.0075	-0.2095	0.3069	0.0298	0.0068
YHR022C	YHR022C	0.0212	-0.1146	-0.0467	0.096	0.0305	0.0069
YHR025W	THR1	-0.5564	0.4176	-0.0694	0.6887	0.0302	0.0071
YHR028C	DAP2	-0.0131	-0.2002	-0.1066	0.1323	0.0301	0.0065
YHR029C	YHR029C	-0.136	-0.0275	-0.0818	0.0767	0.0302	0.0069
YHR030C	SLT2	0.4115	0.191	0.3013	0.1559	0.0306	0.0071
YHR031C	RRM3	0.0295	0.104	0.0668	0.0527	0.0305	0.0072
YHR032W	YHR032W	0.1789	0.1009	0.1399	0.0551	0.0306	0.0073
YHR033W	YHR033W	0.1002	0.3843	0.2423	0.2009	0.0305	0.0067
YHR034C	YHR034C	0.8911	0.1404	0.5157	0.5308	0.0304	0.0069
YHR035W	YHR035W	0.6692	-0.0523	0.3084	0.5102	0.0306	0.007
YHR037W	PUT2	-0.1978	-0.2109	-0.2044	0.0093	0.0315	0.007
YHR038W	RRF1	0.4841	-0.1326	0.1758	0.4361	0.0294	0.0074
YHR039C	MSC7	0.2687	0.7073	0.488	0.3101	0.0315	0.0069
YHR041C	SRB2	0.0773	0.5268	0.3021	0.3179	0.0304	0.007
YHR043C	DOG2	-0.5073	0.0241	-0.2416	0.3757	0.0302	0.007
YHR044C	DOG1	-0.6467	-0.2802	-0.4634	0.2591	0.0301	0.0072
YHR045W	YHR045W	0.0797	-0.143	-0.0317	0.1575	0.0306	0.0069
YHR046C	INM1	0.2194	-0.013	0.1032	0.1643	0.0305	0.0069
YHR047C	AAP1'	0.0196	-0.5665	-0.2734	0.4144	0.0303	0.0069
YHR049C-A	YHR049C-A	-0.1335	-0.3851	-0.2593	0.1779	0.0301	0.0068
YHR049W	YHR049W	0.4767	0.5937	0.5352	0.0828	0.0315	0.0072
YHR057C	CPR2	0.6426	0.2127	0.4276	0.304	0.0306	0.0069
YHR059W	FYV4	1.0783	-0.1363	0.471	0.8589	0.0299	0.0068
YHR061C	GIC1	-0.3346	0.1596	-0.0875	0.3495	0.0305	0.0072
YHR064C	SSZ1	0.5026	0.2048	0.3537	0.2106	0.0305	0.007
YHR066W	SSF1	0.4689	0.1514	0.3102	0.2245	0.0305	0.007
YHR067W	RMD12	1.5079	-0.6612	0.4234	1.5338	0.0304	0.0071
YHR073W	OSH3	0.0618	0.1519	0.1069	0.0637	0.0304	0.0068
YHR075C	PPE1	0.3971	0.1129	0.255	0.201	0.0307	0.0069
YHR076W	PTC7	0.2715	-0.0978	0.0868	0.2611	0.0306	0.0069
YHR077C	NMD2	0.1268	-0.0695	0.0286	0.1388	0.0307	0.007
YHR078W	YHR078W	1.9925	-0.2858	0.8533	1.611	0.0301	0.0065
YHR079C	IRE1	-0.242	-0.7304	-0.4862	0.3454	0.03	0.0068
YHR079C-B	YHR079C-B	-0.3242	0.2581	-0.033	0.4117	0.0303	0.0069
YHR080C	YHR080C	-0.9312	0.0931	-0.419	0.7243	0.03	0.0067
YHR081W	LRP1	-0.7653	-0.0426	-0.4039	0.511	0.0301	0.007
YHR082C	KSP1	0.409	0.3085	0.3588	0.071	0.0312	0.0072
YHR086W	NAM8	-0.07	0.044	-0.013	0.0806	0.0302	0.0069
YHR087W	YHR087W	0.8598	-0.2089	0.3255	0.7557	0.0306	0.0067
YHR092C	HXT4	-0.185	0.0032	-0.0909	0.1331	0.03	0.0067
YHR093W	AHT1	0.3477	-0.0196	0.164	0.2597	0.0304	0.007
YHR094C	HXT1	-0.8981	-0.4846	-0.6914	0.2924	0.0293	0.0066
YHR095W	YHR095W	0.356	0.0961	0.226	0.1838	0.0308	0.0068
YHR096C	HXT5	0.2679	0.2999	0.2839	0.0226	0.0307	0.0069
YHR097C	YHR097C	-0.4699	-0.3263	-0.3981	0.1015	0.0298	0.0069
YHR100C	YHR100C	0.0015	0.2203	0.1109	0.1547	0.0307	0.0072
YHR103W	SBE22	2.1092	0.5289	1.3191	1.1174	0.031	0.0069
YHR104W	GRE3	-0.4881	-0.6168	-0.5525	0.091	0.0303	0.0071
YHR105W	YPT35	0.1143	0.0536	0.084	0.0429	0.0311	0.0074
YHR106W	TRR2	1.0462	0.4607	0.7534	0.414	0.0322	0.0068
YHR108W	GGA2	-0.0428	-0.2368	-0.1398	0.1372	0.0307	0.0072
YHR109W	CTM1	-0.1699	0.1737	0.0019	0.2429	0.0303	0.0069
YHR110W	ERP5	0.3332	0.044	0.1886	0.2045	0.0303	0.0068
YHR111W	UBA4	0.4376	0.2751	0.3564	0.1149	0.0297	0.0066
YHR112C	YHR112C	0.1443	0.9074	0.5258	0.5396	0.0319	0.0074
YHR113W	YHR113W	0.1598	-0.2668	-0.0535	0.3017	0.03	0.0069
YHR114W	BZZ1	-0.1229	-0.3612	-0.242	0.1685	0.0297	0.007
YHR115C	YHR115C	-0.5939	0.3052	-0.1444	0.6358	0.0299	0.0066
YHR116W	YHR116W	-0.9262	-0.1355	-0.5308	0.5591	0.0302	0.0068
YHR117W	TOM71	-0.6413	0.127	-0.2571	0.5433	0.0302	0.0068
YHR121W	YHR121W	-0.5044	0.2239	-0.1402	0.515	0.0302	0.0068
YHR123W	EPT1	0.1133	0.1321	0.1227	0.0133	0.0303	0.0071
YHR124W	NDT80	-0.1644	0.0249	-0.0697	0.1339	0.0305	0.007
YHR125W	YHR125W	0.6442	-0.06	0.2921	0.4979	0.0305	0.0069
YHR126C	YHR126C	1.3365	-0.5164	0.4101	1.3102	0.0304	0.0065
YHR127W	YHR127W	-0.3702	0.4248	0.0273	0.5622	0.0311	0.0071
YHR129C	ARP1	0.8169	0.4876	0.6522	0.2329	0.0313	0.0071
YHR130C	YHR130C	0.3422	0.8339	0.588	0.3477	0.0306	0.0069
YHR131C	YHR131C	0.1843	0.3167	0.2505	0.0937	0.0306	0.0067
YHR132C	ECM14	1.3237	-1.2195	0.0521	1.7983	0.0293	0.0071
YHR132W-A	YHR132W-A	0.9985	-0.1746	0.4119	0.8295	0.0304	0.0067
YHR133C	NSG1	-0.6042	-0.0662	-0.3352	0.3804	0.0306	0.0072
YHR134W	WSS1	0.8024	0.1848	0.4936	0.4367	0.0307	0.0071
YHR135C	YCK1	0.042	-0.5428	-0.2504	0.4136	0.0297	0.0067
YHR136C	SPL2	0.8657	0.9493	0.9075	0.0591	0.0311	0.0069
YHR137W	ARO9	0.738	0.1108	0.4244	0.4435	0.0306	0.0068
YHR138C	YHR138C	-1.2734	-0.1203	-0.6968	0.8154	0.0294	0.0067
YHR139C	SPS100	-0.5297	0.6301	0.0502	0.8201	0.03	0.0064
YHR139C-A	YHR139C-A	0.583	0.4237	0.5034	0.1127	0.031	0.0071
YHR140W	YHR140W	-0.201	-0.3605	-0.2807	0.1127	0.0295	0.0067
YHR142W	CHS7	0.7404	0.0503	0.3953	0.488	0.0313	0.0072
YHR143W	DSE2	-1.3006	-0.4764	-0.8885	0.5828	0.031	0.007
YHR146W	CRP1	0.0141	0.317	0.1656	0.2141	0.0304	0.0068
YHR147C	MRPL6	0.4689	0.2326	0.3508	0.1671	0.0305	0.007
YHR150W	PEX28	-0.0792	0.0591	-0.0101	0.0978	0.0307	0.0074
YHR151C	YHR151C	-0.1196	-0.2584	-0.189	0.0981	0.0305	0.0067
YHR152W	SPO12	1.8047	0.5964	1.2005	0.8544	0.0311	0.0069
YHR153C	SPO16	-0.219	-0.2681	-0.2436	0.0348	0.0297	0.0068
YHR154W	RTT107	0.3901	0.1378	0.264	0.1784	0.0308	0.0071
YHR155W	YHR155W	0.1607	0.0334	0.097	0.09	0.0307	0.007
YHR156C	LIN1	0.483	0.3313	0.4072	0.1073	0.0299	0.0064
YHR157W	REC104	-0.0093	-0.0088	-0.009	0.0004	0.0304	0.0069
YHR158C	KEL1	1.9065	2.912	2.4092	0.711	0.0353	0.0071
YHR160C	PEX18	0.6315	0.0683	0.3499	0.3982	0.0304	0.0066
YHR161C	YAP1801	0.2645	0.2673	0.2659	0.002	0.0307	0.007
YHR162W	YHR162W	0.2218	-0.0219	0.1	0.1723	0.0301	0.0067
YHR163W	SOL3	0.187	0.0706	0.1288	0.0823	0.0301	0.0069
YHR167W	THP2	1.3978	0.4667	0.9323	0.6583	0.0315	0.007
YHR168W	YHR168W	0.4143	0.2453	0.3298	0.1195	0.0315	0.007
YHR171W	ATG7	1.6269	-0.7901	0.4184	1.7091	0.0303	0.0067
YHR176W	FMO	0.6227	-0.1699	0.2264	0.5604	0.0304	0.0068
YHR177W	GON3	-0.065	-0.3857	-0.2254	0.2267	0.0307	0.0075
YHR178W	STB5	0.4355	0.2048	0.3202	0.1631	0.0305	0.007
YHR179W	OYE2	-0.7556	1.051	0.1477	1.2774	0.0303	0.0072
YHR180W	YHR180W	-0.2628	0.0964	-0.0832	0.2541	0.0301	0.007
YHR181W	SVP26	0.5635	0.3676	0.4656	0.1385	0.0311	0.0071
YHR182W	YHR182W	0.1831	0.2656	0.2243	0.0584	0.0305	0.007
YHR183W	GND1	0.4384	0.3537	0.396	0.0599	0.0307	0.0079
YHR184W	SSP1	0.4242	-0.8758	-0.2258	0.9193	0.0303	0.0064
YHR189W	PTH1	1.1918	-0.3432	0.4243	1.0854	0.031	0.0069
YHR191C	CTF8	1.074	-0.0706	0.5017	0.8093	0.0312	0.007
YHR193C	EGD2	1.2893	0.0914	0.6903	0.847	0.0326	0.0067
YHR194W	MDM31	1.3217	0.1078	0.7148	0.8583	0.0301	0.0068
YHR195W	NVJ1	0.5225	0.1689	0.3457	0.2501	0.032	0.0073
YHR198C	FMP22	0.741	0.087	0.414	0.4624	0.0306	0.0067
YHR199C	FMP34	-0.4853	-0.6556	-0.5705	0.1204	0.0295	0.0069
YHR200W	RPN10	0.3436	0.0752	0.2094	0.1898	0.031	0.007
YHR202W	YHR202W	1.1046	0.6722	0.8884	0.3058	0.0326	0.0072
YHR203C	RPS4B	0.3131	0.3161	0.3146	0.0021	0.0309	0.0071
YHR204W	MNL1	-0.0366	0.3863	0.1749	0.2991	0.0305	0.007
YHR206W	SKN7	-0.1011	0.2107	0.0548	0.2205	0.0307	0.0073
YHR207C	SET5	0.2	0.3346	0.2673	0.0952	0.0309	0.0072
YHR209W	YHR209W	-0.4412	0.1766	-0.1323	0.4369	0.0303	0.0068
YHR210C	YHR210C	1.2671	1.2651	1.2661	0.0014	0.033	0.0069
YIL001W	YIL001W	0.0952	-0.5667	-0.2357	0.468	0.0303	0.007
YIL002C	INP51	0.1667	0.1452	0.1559	0.0152	0.0308	0.0073
YIL005W	EPS1	1.37	0.7196	1.0448	0.4599	0.0319	0.0072
YIL006W	YIL006W	1.438	1.0607	1.2494	0.2668	0.0335	0.0074
YIL007C	NAS2	1.2769	1.39	1.3335	0.0799	0.0338	0.0072
YIL008W	URM1	0.7781	0.7517	0.7649	0.0187	0.0315	0.0076
YIL009C-A	EST3	0.6032	0.2724	0.4378	0.2339	0.0309	0.007
YIL009W	FAA3	0.7065	1.3971	1.0518	0.4883	0.0329	0.0069
YIL010W	DOT5	0.5078	0.1826	0.3452	0.23	0.0308	0.007
YIL011W	TIR3	0.9058	0.6522	0.779	0.1793	0.0331	0.007
YIL012W	YIL012W	1.3557	1.3274	1.3415	0.02	0.0335	0.0067
YIL013C	PDR11	0.1735	0.1575	0.1655	0.0113	0.0305	0.007
YIL014W	MNT3	2.817	1.8025	2.3097	0.7174	0.0332	0.0067
YIL015C-A	YIL015C-A	0.5373	0.0289	0.2831	0.3594	0.0313	0.007
YIL015W	BAR1	0.0746	-0.6482	-0.2868	0.5111	0.0298	0.0075
YIL016W	SNL1	-0.0994	-0.3947	-0.2471	0.2088	0.03	0.0071
YIL017C	VID28	0.1937	0.0006	0.0972	0.1365	0.0306	0.0071
YIL020C	HIS6	0.6497	-0.5529	0.0484	0.8504	0.0303	0.007
YIL023C	YIL023C	0.3148	0.1111	0.213	0.1441	0.0307	0.0071
YIL024C	YIL024C	0.3054	-0.0594	0.123	0.2579	0.0303	0.007
YIL025C	YIL025C	0.384	0.4043	0.3942	0.0143	0.0318	0.0072
YIL027C	KRE27	0.7325	-0.0721	0.3302	0.5689	0.03	0.0068
YIL028W	YIL028W	0.9341	1.6521	1.2931	0.5077	0.0331	0.0072
YIL029C	YIL029C	1.1653	0.3296	0.7474	0.591	0.0315	0.0071
YIL030C	SSM4	-0.1442	0.303	0.0794	0.3162	0.0302	0.0066
YIL032C	YIL032C	0.5459	0.1238	0.3348	0.2985	0.0307	0.007
YIL034C	CAP2	-0.8551	0.1243	-0.3654	0.6926	0.0298	0.0064
YIL036W	CST6	1.7158	1.1266	1.4212	0.4166	0.0319	0.0077
YIL037C	PRM2	0.9892	0.9277	0.9584	0.0435	0.0332	0.0069
YIL038C	NOT3	0.3003	0.0045	0.1524	0.2091	0.0307	0.0071
YIL039W	YIL039W	0.9431	0.1352	0.5392	0.5713	0.0301	0.0067
YIL040W	APQ12	0.1422	-0.4064	-0.1321	0.3879	0.0307	0.0079
YIL041W	GVP36	2.2515	0.7631	1.5073	1.0525	0.0331	0.0074
YIL042C	YIL042C	0.7469	0.6197	0.6833	0.09	0.032	0.0074
YIL043C	CBR1	0.0068	-0.1525	-0.0729	0.1127	0.031	0.0072
YIL044C	AGE2	1.4105	0.6071	1.0088	0.5681	0.0312	0.007
YIL045W	PIG2	0.7047	0.4841	0.5944	0.156	0.031	0.0071
YIL047C	SYG1	0.9803	0.496	0.7382	0.3424	0.0318	0.007
YIL049W	DFG10	0.4689	0.177	0.323	0.2065	0.0305	0.007
YIL050W	PCL7	1.3608	0.6136	0.9872	0.5283	0.0333	0.0074
YIL052C	RPL34B	-1.0129	-0.5597	-0.7863	0.3205	0.0288	0.0065
YIL053W	RHR2	0.6934	0.4933	0.5933	0.1415	0.0323	0.0075
YIL054W	YIL054W	0.151	0.7681	0.4596	0.4364	0.0312	0.007
YIL055C	YIL055C	0.2723	0.4062	0.3393	0.0947	0.0307	0.0069
YIL056W	YIL056W	0.5682	-0.1385	0.2149	0.4997	0.0325	0.0071
YIL057C	YIL057C	0.0632	0.2155	0.1394	0.1077	0.031	0.0069
YIL058W	YIL058W	0.1515	0.3474	0.2495	0.1385	0.0305	0.0069
YIL059C	YIL059C	0.1961	0.075	0.1355	0.0856	0.0305	0.0069
YIL060W	YIL060W	0.5598	-0.0791	0.2404	0.4518	0.031	0.0069
YIL064W	YIL064W	0.8921	0.556	0.724	0.2377	0.0317	0.0071
YIL065C	FIS1	0.9531	0.5624	0.7577	0.2762	0.0319	0.0071
YIL066C	RNR3	1.1562	0.6732	0.9147	0.3416	0.0321	0.0069
YIL067C	YIL067C	0.5932	0.244	0.4186	0.247	0.0305	0.007
YIL069C	RPS24B	-0.2819	-0.4374	-0.3596	0.1099	0.0309	0.0074
YIL070C	MAM33	0.4481	-0.6775	-0.1147	0.7959	0.0303	0.0071
YIL071C	PCI8	1.0273	-0.0267	0.5003	0.7453	0.0299	0.0069
YIL072W	HOP1	0.322	0.3597	0.3408	0.0266	0.0312	0.0071
YIL073C	SPO22	1.0064	0.4892	0.7478	0.3657	0.0317	0.0072
YIL074C	SER33	0.3074	-0.81	-0.2513	0.7902	0.0302	0.0069
YIL076W	SEC28	1.3754	2.7324	2.0539	0.9595	0.0338	0.0075
YIL077C	YIL077C	0.7417	0.4241	0.5829	0.2246	0.0317	0.0073
[truncated: 2,471 more rows]
