# Supplementary material for: Microfluidic genome-wide profiling of intrinsic electrical properties in Saccharomyces cerevisiae
Source: Royal Society of Chemistry journal article supplement (doi:10.1039/c3lc50162k), 2013-01-01
Supplement: c3lc50162k_2.xlsx [file c3lc50162k_2.xlsx]

## Sheet: Sheet1
Systematic name	Common name	Electrical Log Ratios				Effective cond.
		y (1)	y (2)	y (avg.)	Δy	Average	Spread
YAL004W	YAL004W	0.3423	0.3109	0.3266	0.0222	0.2392	0.0417
YAL005C	SSA1	-0.3448	-0.2752	-0.31	0.0492	0.227	0.0433
YAL008W	FUN14	0.0119	0.0326	0.0223	0.0146	0.2329	0.0429
YAL010C	MDM10	-0.8221	-0.6043	-0.7132	0.154	0.2178	0.0472
YAL011W	SWC1	0.0498	-0.195	-0.0726	0.1731	0.2304	0.0414
YAL012W	CYS3	0.4179	0.1089	0.2634	0.2185	0.2378	0.0418
YAL015C	NTG1	-0.0733	-0.1133	-0.0933	0.0283	0.2301	0.0405
YAL017W	PSK1	-0.0842	-0.4134	-0.2488	0.2328	0.2277	0.0424
YAL018C	YAL018C	-0.1828	0.0083	-0.0873	0.1352	0.2307	0.0427
YAL019W	FUN30	-0.1174	-0.3607	-0.2391	0.1721	0.2281	0.0425
YAL020C	ATS1	-0.1402	-0.4348	-0.2875	0.2083	0.2268	0.0421
YAL021C	CCR4	-0.0074	-0.241	-0.1242	0.1652	0.2305	0.0429
YAL022C	FUN26	-0.092	-0.1245	-0.1082	0.023	0.2303	0.0428
YAL023C	PMT2	0.2124	-0.4502	-0.1189	0.4685	0.2296	0.0419
YAL024C	LTE1	-0.2101	-0.1711	-0.1906	0.0276	0.2271	0.0434
YAL026C	DRS2	-0.6991	-0.5482	-0.6236	0.1067	0.2208	0.0431
YAL027W	YAL027W	-0.1565	-0.2545	-0.2055	0.0693	0.2286	0.0429
YAL028W	FRT2	-0.0077	-0.1122	-0.0599	0.0739	0.231	0.0423
YAL029C	MYO4	-0.0074	-0.2537	-0.1305	0.1742	0.2305	0.0429
YAL030W	SNC1	-0.4987	0.018	-0.2404	0.3654	0.2284	0.0441
YAL031C	FUN21	-0.161	-0.0939	-0.1274	0.0475	0.2302	0.0428
YAL034C	FUN19	-0.2125	-0.2854	-0.2489	0.0516	0.2276	0.0425
YAL035W	FUN12	-0.7883	-0.574	-0.6812	0.1516	0.2144	0.0507
YAL036C	FUN11	0.0864	0.1466	0.1165	0.0426	0.2339	0.0409
YAL037W	YAL037W	-0.2624	-0.2145	-0.2385	0.0339	0.228	0.0425
YAL039C	CYC3	-0.4711	-0.081	-0.276	0.2758	0.2278	0.045
YAL040C	CLN3	-0.2492	0.1114	-0.0689	0.2549	0.2313	0.0431
YAL042W	ERV46	-0.0825	-0.1738	-0.1282	0.0646	0.2297	0.0421
YAL043C-A	YAL043C-A	0.1783	-0.0787	0.0498	0.1818	0.2323	0.0391
YAL045C	YAL045C	-0.0747	0.007	-0.0338	0.0578	0.2317	0.0428
YAL046C	YAL046C	0.0484	-0.2095	-0.0805	0.1823	0.2258	0.0453
YAL047C	SPC72	-0.02	-0.241	-0.1305	0.1563	0.2305	0.0429
YAL048C	GON1	-0.0664	-0.7302	-0.3983	0.4694	0.2247	0.0416
YAL049C	YAL049C	0.4852	0.5122	0.4987	0.0191	0.2457	0.0355
YAL051W	OAF1	0.0563	0.056	0.0561	0.0002	0.2347	0.0452
YAL054C	ACS1	0.1042	-0.1555	-0.0256	0.1836	0.2298	0.0427
YAL055W	PEX22	0.047	-0.2352	-0.0941	0.1996	0.23	0.0412
YAL056W	GPB2	0.0185	-0.224	-0.1027	0.1715	0.2326	0.0435
YAL058C-A	YAL058C-A	-0.1917	-0.5111	-0.3514	0.2258	0.2218	0.0449
YAL058W	CNE1	-0.4819	-0.6168	-0.5493	0.0954	0.2228	0.0457
YAL059W	ECM1	-0.2498	-0.1959	-0.2229	0.0381	0.2288	0.0459
YAL060W	BDH1	-0.0192	-0.0839	-0.0515	0.0457	0.2317	0.0439
YAL061W	YAL061W	-0.0535	0.0787	0.0126	0.0935	0.2321	0.0417
YAL062W	GDH3	-0.0824	0.0916	0.0046	0.123	0.2328	0.0437
YAL064C-A	YAL064C-A	-0.1263	-0.1051	-0.1157	0.015	0.2281	0.0419
YAL065C	YAL065C	0.104	-0.1335	-0.0148	0.1679	0.2321	0.0428
YAL066W	YAL066W	-0.0245	0.1717	0.0736	0.1387	0.2336	0.0425
YAL067C	SEO1	-0.1324	-0.1564	-0.1444	0.0169	0.2298	0.043
YAL068C	YAL068C	-0.1463	0.1162	-0.015	0.1856	0.2316	0.0415
YAR002C-A	ERP1	0.002	-0.1866	-0.0923	0.1334	0.2289	0.043
YAR002W	NUP60	0.0464	-0.1393	-0.0465	0.1313	0.2322	0.045
YAR003W	SWD1	0.5881	0.0753	0.3317	0.3626	0.2401	0.0424
YAR014C	BUD14	0.1983	-0.2662	-0.034	0.3285	0.2391	0.0482
YAR015W	ADE1	-0.0179	-0.0138	-0.0158	0.0029	0.2328	0.0386
YAR020C	PAU7	0.0219	0.2302	0.126	0.1473	0.2339	0.0415
YAR023C	YAR023C	-0.1117	-0.0865	-0.0991	0.0178	0.2302	0.0415
YAR027W	UIP3	0.008	0.1727	0.0904	0.1164	0.2343	0.0429
YAR028W	YAR028W	-0.1421	-0.3094	-0.2257	0.1183	0.228	0.0414
YAR029W	YAR029W	-0.2657	-0.4514	-0.3586	0.1313	0.2259	0.0441
YAR030C	YAR030C	-0.0338	-0.1924	-0.1131	0.1122	0.2304	0.0435
YAR031W	PRM9	0.099	-0.0524	0.0233	0.1071	0.2323	0.0415
YAR035W	YAT1	-0.179	-0.3241	-0.2515	0.1025	0.2275	0.0421
YAR037W	YAR037W	-0.2376	-0.2487	-0.2431	0.0078	0.228	0.0433
YAR040C	YAR040C	0.2534	-0.2832	-0.0149	0.3794	0.2316	0.0415
YAR043C	YAR043C	-0.0074	-0.1798	-0.0936	0.1219	0.2305	0.0429
YAR044W	OSH1	-0.2621	-0.1646	-0.2133	0.069	0.2284	0.0431
YAR047C	YAR047C	-0.1649	-0.2793	-0.2221	0.0808	0.2285	0.0436
YAR050W	FLO1	0.1185	-0.1303	-0.0059	0.1759	0.23	0.0417
YBL001C	ECM15	0.0822	-0.2877	-0.1028	0.2615	0.2285	0.0422
YBL003C	HTA2	-0.1463	-0.1607	-0.1535	0.0102	0.2254	0.0426
YBL005W	PDR3	-0.1849	-0.2376	-0.2113	0.0372	0.2285	0.0427
YBL006C	LDB7	0.5221	0.1672	0.3446	0.251	0.2403	0.0448
YBL007C	SLA1	-1.6568	-2.0374	-1.8471	0.2691	0.1877	0.0482
YBL008W	HIR1	-0.012	-0.0411	-0.0265	0.0206	0.2293	0.039
YBL009W	YBL009W	-0.1319	-0.0349	-0.0834	0.0686	0.2285	0.0404
YBL010C	YBL010C	-0.2079	-0.1778	-0.1928	0.0213	0.229	0.0434
YBL011W	SCT1	0.3658	0.0364	0.2011	0.2329	0.2346	0.0422
YBL012C	YBL012C	-0.4962	-0.8185	-0.6574	0.228	0.2181	0.0457
YBL013W	FMT1	0.6956	0.6337	0.6646	0.0438	0.2424	0.0352
YBL015W	ACH1	-0.0641	0.1129	0.0244	0.1251	0.2304	0.0423
YBL016W	FUS3	0.3023	0.3313	0.3168	0.0205	0.2415	0.0336
YBL017C	PEP1	0.5685	0.8944	0.7315	0.2305	0.2445	0.0398
YBL019W	APN2	-0.2803	-0.175	-0.2276	0.0744	0.2262	0.043
YBL021C	HAP3	0.2726	-0.2352	0.0187	0.3591	0.2308	0.0438
YBL022C	PIM1	-0.5574	-0.5369	-0.5472	0.0145	0.2183	0.0427
YBL024W	NCL1	-0.7544	-0.0748	-0.4146	0.4805	0.2235	0.0411
YBL027W	RPL19B	-0.6113	-0.9273	-0.7693	0.2235	0.2187	0.0433
YBL028C	YBL028C	-0.0212	-0.2253	-0.1232	0.1443	0.2302	0.0431
YBL029W	YBL029W	0.2433	-0.1238	0.0597	0.2596	0.2293	0.0445
YBL031W	SHE1	0.0623	-0.1452	-0.0414	0.1468	0.2298	0.0425
YBL032W	HEK2	0.4268	1.1884	0.8076	0.5385	0.2472	0.0409
YBL036C	YBL036C	-0.2235	0.2264	0.0015	0.3181	0.2304	0.041
YBL037W	APL3	0.6949	0.0972	0.396	0.4227	0.2394	0.0392
YBL038W	MRPL16	-0.5607	-0.8102	-0.6855	0.1765	0.2196	0.0445
YBL039C	URA7	0.1227	0.257	0.1899	0.0949	0.2504	0.042
YBL042C	FUI1	-0.7967	-0.237	-0.5168	0.3958	0.2194	0.0451
YBL043W	ECM13	0.2431	-0.325	-0.041	0.4017	0.2299	0.0431
YBL044W	YBL044W	0.1569	-0.4919	-0.1675	0.4588	0.2278	0.0453
YBL045C	COR1	0.3787	-1.0553	-0.3383	1.014	0.2244	0.0418
YBL046W	YBL046W	0.081	-0.0718	0.0046	0.1081	0.2324	0.0425
YBL047C	EDE1	0.0269	-0.2578	-0.1154	0.2013	0.2276	0.0429
YBL048W	YBL048W	0.0485	-0.1106	-0.0311	0.1125	0.2312	0.0406
YBL049W	MOH1	-0.1826	0.8128	0.3151	0.7039	0.2338	0.0379
YBL051C	PIN4	-0.5912	-0.4743	-0.5328	0.0827	0.219	0.0482
YBL052C	SAS3	0.0811	-0.174	-0.0464	0.1804	0.2316	0.0423
YBL053W	YBL053W	-0.3831	0.2647	-0.0592	0.4581	0.2296	0.0427
YBL054W	YBL054W	0.0109	0.1343	0.0726	0.0873	0.2334	0.0419
YBL055C	YBL055C	-0.3139	0.254	-0.0299	0.4016	0.232	0.0406
YBL056W	PTC3	0.0829	0.2787	0.1808	0.1384	0.2323	0.0416
YBL057C	PTH2	-0.086	-0.0793	-0.0827	0.0047	0.2283	0.0402
YBL058W	SHP1	-0.9521	-0.9211	-0.9366	0.0219	0.1678	0.0548
YBL060W	YBL060W	0.1887	-0.1268	0.031	0.2231	0.2327	0.0417
YBL061C	SKT5	0.1799	0.0013	0.0906	0.1263	0.2311	0.0379
YBL062W	YBL062W	0.2307	0.5626	0.3967	0.2347	0.2436	0.0291
YBL063W	KIP1	0.1885	0.0746	0.1316	0.0806	0.2306	0.0405
YBL064C	PRX1	0.1823	0.5884	0.3853	0.2872	0.2392	0.0442
YBL065W	YBL065W	-0.0008	-0.1011	-0.0509	0.071	0.229	0.0403
YBL066C	SEF1	0.0623	-0.2125	-0.0751	0.1943	0.231	0.043
YBL067C	UBP13	0.0357	-0.2347	-0.0995	0.1912	0.2288	0.0429
YBL068W	PRS4	-0.0608	-0.247	-0.1539	0.1316	0.2267	0.0392
YBL069W	AST1	0.3148	0.389	0.3519	0.0524	0.2346	0.0408
YBL070C	YBL070C	0.3164	-0.1472	0.0846	0.3278	0.2315	0.0417
YBL071C	YBL071C	-0.0074	-0.2095	-0.1084	0.1429	0.2298	0.0451
YBL072C	RPS8A	-1.4008	-1.0955	-1.2481	0.2159	0.2079	0.0419
YBL075C	SSA3	-0.0074	-0.241	-0.1242	0.1652	0.2305	0.0429
YBL078C	ATG8	0.2065	-0.0159	0.0953	0.1572	0.2317	0.0419
YBL079W	NUP170	0.1827	-0.0258	0.0785	0.1474	0.2313	0.0419
YBL080C	PET112	-0.6555	-1.1025	-0.879	0.3161	0.2141	0.0447
YBL081W	YBL081W	1.9846	1.3473	1.6659	0.4506	0.2567	0.032
YBL082C	RHK1	0.3057	0.4313	0.3685	0.0888	0.2364	0.0403
YBL083C	YBL083C	0.4893	0.406	0.4477	0.0589	0.238	0.0402
YBL085W	BOI1	0.3963	0.3961	0.3962	0.0001	0.237	0.0411
YBL086C	YBL086C	0.0154	0.5918	0.3036	0.4075	0.235	0.0406
YBL087C	RPL23A	-0.3512	-0.1032	-0.2272	0.1754	0.2233	0.0427
YBL088C	TEL1	-0.2928	0.6388	0.173	0.6588	0.2315	0.0389
YBL089W	AVT5	-0.6677	-0.5434	-0.6056	0.0879	0.2217	0.0431
YBL090W	MRP21	-0.3847	-0.2796	-0.3322	0.0743	0.2237	0.0465
YBL091C	MAP2	0.1727	0.0772	0.1249	0.0676	0.2322	0.0422
YBL091C-A	SCS22	-0.2635	-0.1051	-0.1843	0.112	0.2293	0.0439
YBL094C	YBL094C	-0.2239	0.3855	0.0808	0.4309	0.2427	0.0591
YBL095W	YBL095W	-0.2184	-0.0363	-0.1273	0.1287	0.2303	0.0438
YBL096C	YBL096C	0.9395	0.2193	0.5794	0.5092	0.2405	0.0363
YBL098W	BNA4	0.0533	-0.1	-0.0233	0.1084	0.2288	0.0407
YBL099W	ATP1	0.8193	0.5072	0.6633	0.2207	0.2422	0.0431
YBL100C	YBL100C	-0.6682	-1.3172	-0.9927	0.4589	0.2126	0.0465
YBL102W	SFT2	0.2969	0.1211	0.209	0.1243	0.235	0.044
YBL103C	RTG3	-0.3409	-0.401	-0.371	0.0425	0.2259	0.0429
YBL104C	YBL104C	0.0062	0.052	0.0291	0.0324	0.2299	0.0384
YBL106C	SRO77	0.2259	0.0019	0.1139	0.1584	0.2318	0.0416
YBL107C	YBL107C	0.4789	0.192	0.3355	0.2029	0.2349	0.0402
YBR001C	NTH2	-0.1897	-0.2579	-0.2238	0.0483	0.2264	0.0442
YBR003W	COQ1	-0.3709	-0.6623	-0.5166	0.206	0.2229	0.0452
YBR006W	UGA2	0.0992	0.0488	0.074	0.0356	0.2318	0.0425
YBR007C	YBR007C	0.3953	0.0466	0.221	0.2466	0.2338	0.0417
YBR008C	FLR1	0.2269	-0.0263	0.1003	0.179	0.2309	0.0402
YBR009C	HHF1	0.0396	0.0806	0.0601	0.0289	0.2316	0.045
YBR010W	HHT1	0.2369	0.2761	0.2565	0.0277	0.2338	0.0399
YBR013C	YBR013C	0.0995	0.0915	0.0955	0.0057	0.2314	0.0412
YBR014C	YBR014C	0.0068	0.0307	0.0187	0.0169	0.2301	0.0423
YBR015C	MNN2	0.682	0.5599	0.621	0.0863	0.2443	0.0397
YBR016W	YBR016W	0.1632	-0.2916	-0.0642	0.3216	0.2309	0.0423
YBR018C	GAL7	-0.3619	0.1205	-0.1207	0.3411	0.2285	0.0443
YBR019C	GAL10	0.0463	-0.237	-0.0953	0.2003	0.2289	0.0425
YBR020W	GAL1	0.1843	-0.1153	0.0345	0.2118	0.2305	0.0418
YBR020W	GAL1	0.0548	-0.2327	-0.0889	0.2033	0.2306	0.0426
YBR021W	FUR4	0.1625	0.2002	0.1813	0.0266	0.2339	0.0424
YBR022W	YBR022W	0.4992	0.47	0.4846	0.0206	0.238	0.041
YBR023C	CHS3	0.4219	0.3006	0.3612	0.0858	0.2378	0.0439
YBR024W	SCO2	0.0446	-0.1165	-0.0359	0.114	0.2316	0.0426
YBR025C	YBR025C	-0.1781	-0.0325	-0.1053	0.1029	0.2284	0.0418
YBR027C	YBR027C	0.2692	0.1203	0.1948	0.1053	0.2328	0.0413
YBR028C	YBR028C	0.115	0.0005	0.0578	0.081	0.2318	0.044
YBR030W	YBR030W	0.3604	-0.0403	0.16	0.2834	0.2353	0.0414
YBR031W	RPL4A	-0.5107	-0.2506	-0.3807	0.1839	0.2226	0.0412
YBR032W	YBR032W	0.4262	0.5848	0.5055	0.1122	0.2391	0.0437
YBR033W	EDS1	0.2226	-0.1556	0.0335	0.2674	0.2308	0.0428
YBR034C	HMT1	-0.3641	-0.575	-0.4696	0.1492	0.2242	0.0448
YBR035C	PDX3	-0.0353	-0.2252	-0.1302	0.1343	0.2305	0.0429
YBR036C	CSG2	-0.1036	-0.2627	-0.1832	0.1125	0.2273	0.0432
YBR037C	SCO1	-0.1055	-0.5141	-0.3098	0.2889	0.2262	0.0401
YBR040W	FIG1	0.786	0.9079	0.847	0.0862	0.2466	0.036
YBR041W	FAT1	-0.3879	-0.2013	-0.2946	0.1319	0.2252	0.0446
YBR042C	YBR042C	0.4636	-0.1026	0.1805	0.4004	0.2332	0.0392
YBR043C	YBR043C	-0.0689	0.1158	0.0235	0.1306	0.2299	0.0404
YBR044C	TCM62	-0.2933	0.0946	-0.0994	0.2743	0.2292	0.0441
YBR045C	GIP1	0.495	0.6326	0.5638	0.0973	0.2399	0.0408
YBR046C	ZTA1	-0.3339	0.1024	-0.1157	0.3085	0.2284	0.0425
YBR047W	FMP23	-0.0164	-0.0614	-0.0389	0.0318	0.2296	0.043
YBR048W	RPS11B	-0.0141	-0.1371	-0.0756	0.087	0.2347	0.0423
YBR050C	REG2	-0.1682	-0.4558	-0.312	0.2033	0.2247	0.0433
YBR051W	YBR051W	0.0734	-0.257	-0.0918	0.2336	0.2289	0.043
YBR052C	YBR052C	0.1074	0.0561	0.0817	0.0362	0.2322	0.0433
YBR053C	YBR053C	-0.0074	0.1548	0.0737	0.1147	0.2324	0.0439
YBR054W	YRO2	-0.1589	-0.067	-0.1129	0.065	0.2277	0.0403
YBR056W	YBR056W	-0.2495	-0.1453	-0.1974	0.0737	0.2288	0.0428
YBR057C	MUM2	0.668	0.5926	0.6303	0.0533	0.2441	0.0408
YBR058C	UBP14	0.1129	-0.0039	0.0545	0.0826	0.2311	0.0423
YBR059C	AKL1	-0.1155	0.1926	0.0386	0.2178	0.2327	0.0417
YBR061C	TRM7	0.807	0.6826	0.7448	0.088	0.2424	0.0392
YBR062C	YBR062C	-0.1238	-0.5342	-0.329	0.2902	0.2244	0.0435
YBR063C	YBR063C	0.483	0.0141	0.2486	0.3315	0.2341	0.0411
YBR064W	YBR064W	0.0802	0.1153	0.0977	0.0248	0.2306	0.0399
YBR065C	ECM2	-0.2112	-0.1713	-0.1912	0.0282	0.2288	0.0427
YBR066C	NRG2	0.4188	0.0812	0.25	0.2387	0.2347	0.0407
YBR067C	TIP1	0.044	-0.0211	0.0115	0.046	0.2292	0.0417
YBR068C	BAP2	0.1574	-0.2548	-0.0487	0.2915	0.2285	0.0412
YBR069C	TAT1	-0.1555	0.2501	0.0473	0.2868	0.2327	0.0429
YBR071W	YBR071W	-0.2648	0.2121	-0.0263	0.3372	0.2303	0.044
YBR072W	HSP26	0.0823	-0.3814	-0.1496	0.3278	0.2274	0.0427
YBR073W	RDH54	0.4337	0.0724	0.2531	0.2555	0.2358	0.0434
YBR074W	YBR074W	0.6011	0.1524	0.3768	0.3173	0.2364	0.0399
YBR075W	YBR075W	-0.2399	-0.0386	-0.1392	0.1424	0.2296	0.0429
YBR076W	ECM8	-0.2306	0.0328	-0.0989	0.1862	0.2292	0.0443
YBR077C	YBR077C	-0.9857	-0.718	-0.8518	0.1893	0.2144	0.044
YBR081C	SPT7	-0.3887	-0.0782	-0.2334	0.2195	0.2243	0.0556
YBR082C	UBC4	-0.6565	-0.4202	-0.5383	0.1671	0.2225	0.0446
YBR083W	TEC1	0.1995	-0.0746	0.0624	0.1939	0.2312	0.0414
YBR084C-A	RPL19A	-0.4631	-0.4008	-0.4319	0.044	0.2246	0.0443
YBR084W	MIS1	0.0831	-0.18	-0.0485	0.1861	0.2317	0.0437
YBR085W	AAC3	0.459	0.4058	0.4324	0.0376	0.2419	0.0443
YBR090C	YBR090C	-0.1052	0.0894	-0.0079	0.1376	0.2297	0.042
YBR090C-A	YBR090C-A	0.0229	0.2439	0.1334	0.1563	0.2337	0.0448
YBR092C	PHO3	-0.3443	0.2459	-0.0492	0.4173	0.2294	0.0421
YBR095C	RXT2	0.1604	-0.5997	-0.2196	0.5375	0.2268	0.0463
YBR098W	MMS4	-0.0287	-0.2126	-0.1206	0.13	0.2297	0.0423
YBR099C	YBR099C	0.1921	-0.0816	0.0552	0.1935	0.2317	0.0443
YBR100W	YBR100W	0.2324	0.022	0.1272	0.1488	0.2328	0.0434
YBR103W	SIF2	-0.0043	-0.2881	-0.1462	0.2007	0.228	0.0429
YBR104W	YMC2	0.3022	-0.0335	0.1344	0.2374	0.2322	0.0414
YBR105C	VID24	-0.0621	-0.6459	-0.354	0.4128	0.2242	0.0453
YBR106W	PHO88	0.633	0.6928	0.6629	0.0423	0.2427	0.0497
YBR107C	IML3	-0.423	-0.0711	-0.2471	0.2488	0.2261	0.0433
YBR108W	YBR108W	0.1695	0.0859	0.1277	0.0591	0.2404	0.0455
YBR111C	YSA1	0.3334	0.5941	0.4637	0.1844	0.2408	0.0376
YBR113W	YBR113W	0.1701	-0.2778	-0.0539	0.3167	0.2289	0.0408
YBR114W	RAD16	0.1141	0.1445	0.1293	0.0215	0.2324	0.042
YBR115C	LYS2	-0.2862	0.1968	-0.0447	0.3415	0.2295	0.0413
YBR116C	YBR116C	0.1416	0.2694	0.2055	0.0904	0.2338	0.0416
YBR119W	MUD1	0.1391	0.0084	0.0738	0.0924	0.2321	0.0441
YBR120C	CBP6	-0.3252	-0.6826	-0.5039	0.2528	0.2224	0.0392
YBR125C	PTC4	0.0644	0.0055	0.035	0.0417	0.2322	0.0352
YBR126C	TPS1	-0.4321	-0.5153	-0.4737	0.0589	0.2219	0.0461
YBR128C	ATG14	0.5316	0.0648	0.2982	0.3301	0.2352	0.0419
YBR129C	OPY1	-0.2048	0.4048	0.1	0.4311	0.2322	0.0428
YBR130C	SHE3	0.1217	0.1027	0.1122	0.0135	0.2316	0.0417
YBR131W	CCZ1	-0.1636	-0.3019	-0.2328	0.0978	0.225	0.0448
YBR132C	AGP2	-1.087	-1.2432	-1.1651	0.1105	0.2049	0.0501
YBR133C	HSL7	0.4717	0.4618	0.4667	0.007	0.2389	0.0435
YBR134W	YBR134W	0.8843	1.4723	1.1783	0.4158	0.2597	0.0442
YBR137W	YBR137W	-0.15	0.1644	0.0072	0.2223	0.2369	0.0307
YBR138C	YBR138C	0.0215	-0.0253	-0.0019	0.0331	0.2289	0.0387
YBR139W	YBR139W	-0.1584	0.1229	-0.0177	0.1989	0.2289	0.0399
YBR141C	YBR141C	0.0692	-0.1847	-0.0577	0.1795	0.2278	0.0404
YBR144C	YBR144C	0.0374	-0.2863	-0.1244	0.2289	0.228	0.0444
YBR145W	ADH5	-0.0526	0.2171	0.0822	0.1907	0.2311	0.041
YBR146W	MRPS9	-0.2733	-0.3556	-0.3145	0.0581	0.2289	0.0375
YBR147W	YBR147W	-0.585	-0.0377	-0.3113	0.387	0.2234	0.0394
YBR148W	YSW1	0.0196	-0.1209	-0.0506	0.0994	0.231	0.0417
YBR149W	ARA1	0.1831	0.0405	0.1118	0.1008	0.2324	0.0416
YBR150C	TBS1	-0.1535	-0.3083	-0.2309	0.1095	0.2266	0.0424
YBR151W	APD1	-0.0351	-0.3828	-0.2089	0.2459	0.2234	0.045
YBR156C	SLI15	0.0364	0.0368	0.0366	0.0003	0.2307	0.0412
YBR157C	ICS2	0.068	-0.085	-0.0085	0.1082	0.2298	0.0416
YBR161W	YBR161W	-0.2888	0.0045	-0.1421	0.2074	0.2273	0.0402
YBR162C	TOS1	0.1471	-0.4066	-0.1297	0.3916	0.2219	0.0428
YBR162W-A	YSY6	-0.1795	-0.0783	-0.1289	0.0716	0.2274	0.0415
YBR164C	ARL1	-0.0074	-0.1895	-0.0984	0.1288	0.2305	0.0429
YBR165W	UBS1	-0.2022	0.1757	-0.0132	0.2672	0.2298	0.0414
YBR166C	TYR1	0.41	-0.0732	0.1684	0.3417	0.2329	0.0411
YBR168W	YBR168W	-0.626	-0.4943	-0.5601	0.0931	0.2196	0.0417
YBR169C	SSE2	0.2389	0.0999	0.1694	0.0983	0.2334	0.0435
YBR170C	NPL4	0.1596	-0.0243	0.0676	0.13	0.2331	0.0416
YBR171W	SEC66	-0.1016	0.0137	-0.044	0.0816	0.2319	0.0429
YBR172C	SMY2	0.1251	-0.084	0.0206	0.1478	0.2321	0.0418
YBR173C	UMP1	-0.2813	-0.1074	-0.1944	0.1229	0.2275	0.0473
YBR174C	YBR174C	1.1928	0.5472	0.87	0.4565	0.2528	0.037
YBR175W	SWD3	0.1091	-0.066	0.0216	0.1238	0.2352	0.0385
YBR176W	ECM31	-0.1426	0.2233	0.0403	0.2587	0.2332	0.0431
YBR177C	EHT1	0.0459	0.0773	0.0616	0.0222	0.2311	0.0403
YBR178W	YBR178W	-0.123	-0.2069	-0.1649	0.0593	0.2305	0.0429
YBR179C	FZO1	-0.9465	-1.1487	-1.0476	0.143	0.2066	0.0456
YBR180W	DTR1	0.0059	0.111	0.0584	0.0743	0.2317	0.0429
YBR181C	RPS6B	-1.0195	-0.7835	-0.9015	0.1669	0.2119	0.0458
YBR183W	YPC1	-0.2025	-0.0904	-0.1464	0.0793	0.226	0.0451
YBR184W	YBR184W	0.1584	-0.4718	-0.1567	0.4456	0.2269	0.0424
YBR185C	MBA1	-0.7229	0.302	-0.2105	0.7247	0.2266	0.0396
YBR186W	PCH2	0.1189	-0.1936	-0.0373	0.221	0.2298	0.043
YBR187W	YBR187W	0.1688	0.0205	0.0947	0.1049	0.2321	0.0422
YBR188C	NTC20	-0.1369	-0.1022	-0.1196	0.0245	0.2281	0.0426
YBR189W	RPS9B	-1.2754	-0.9859	-1.1306	0.2047	0.2104	0.0451
YBR191W	RPL21A	-1.1175	-1.595	-1.3563	0.3376	0.2023	0.0484
YBR194W	SOY1	-0.3138	-0.5688	-0.4413	0.1803	0.2227	0.045
YBR195C	MSI1	0.1071	0.0321	0.0696	0.0531	0.2313	0.0403
YBR197C	YBR197C	0.5075	-0.0677	0.2199	0.4067	0.2359	0.0406
YBR199W	KTR4	0.6512	-0.0719	0.2897	0.5113	0.2368	0.0432
YBR200W	BEM1	-0.9197	-0.5434	-0.7315	0.266	0.1999	0.0535
YBR201W	DER1	0.1774	0.2619	0.2196	0.0598	0.2344	0.0405
YBR203W	COS111	0.3293	0.4768	0.403	0.1043	0.2407	0.0446
YBR204C	YBR204C	0.7784	0.3527	0.5655	0.301	0.2409	0.0374
YBR205W	KTR3	0.2923	0.2073	0.2498	0.0601	0.2364	0.0446
YBR206W	YBR206W	-0.2881	-0.3564	-0.3223	0.0483	0.2246	0.0438
YBR207W	FTH1	0.2671	0.1563	0.2117	0.0784	0.234	0.0411
YBR208C	DUR1,2	0.4075	-0.0302	0.1886	0.3095	0.2335	0.0422
YBR209W	YBR209W	-0.0876	-0.0505	-0.0691	0.0263	0.2295	0.0436
YBR210W	ERV15	0.5136	0.0366	0.2751	0.3373	0.2345	0.0416
YBR212W	NGR1	0.5654	0.5898	0.5776	0.0173	0.2405	0.0423
YBR213W	MET8	0.0348	-0.226	-0.0956	0.1844	0.2294	0.0417
YBR214W	SDS24	0.454	0.0779	0.266	0.2659	0.2386	0.0324
YBR215W	HPC2	0.1537	-0.4442	-0.1452	0.4228	0.2309	0.0408
YBR216C	YBP1	0.0624	-0.0332	0.0146	0.0676	0.2388	0.0415
YBR217W	ATG12	-0.2562	-0.1081	-0.1821	0.1047	0.2273	0.0447
YBR218C	PYC2	-0.4682	0.5231	0.0274	0.7009	0.231	0.0405
YBR219C	YBR219C	-0.0322	-0.2078	-0.12	0.1242	0.2315	0.0403
YBR220C	YBR220C	0.2246	0.2462	0.2354	0.0152	0.2334	0.0408
YBR222C	PCS60	0.1115	-0.1583	-0.0234	0.1908	0.2298	0.0419
YBR223C	TDP1	0.3854	0.1119	0.2486	0.1934	0.2348	0.0426
YBR224W	YBR224W	-0.2202	-0.5166	-0.3684	0.2096	0.2214	0.0369
YBR225W	YBR225W	-0.4395	-0.5147	-0.4771	0.0532	0.2197	0.0416
YBR226C	YBR226C	-0.8541	-0.8393	-0.8467	0.0105	0.2161	0.0418
YBR227C	MCX1	0.2772	0.2077	0.2424	0.0492	0.2352	0.0421
YBR228W	SLX1	-0.0001	-0.1446	-0.0723	0.1022	0.2319	0.0452
YBR229C	ROT2	-0.2885	-0.4102	-0.3494	0.086	0.2238	0.0405
YBR231C	AOR1	0.3854	-0.0642	0.1606	0.3179	0.2335	0.0429
YBR232C	YBR232C	0.2579	0.4603	0.3591	0.1431	0.2344	0.0374
YBR233W	PBP2	-0.0097	0.0027	-0.0035	0.0087	0.2309	0.0436
YBR235W	YBR235W	-0.3485	-0.1462	-0.2474	0.143	0.2261	0.0421
YBR238C	YBR238C	-0.0293	-0.1224	-0.0759	0.0658	0.2291	0.0434
YBR239C	YBR239C	0.0549	0.0876	0.0712	0.0231	0.2313	0.0421
YBR240C	THI2	0.2406	-0.3223	-0.0408	0.398	0.2309	0.0413
YBR241C	YBR241C	0.3622	-0.2522	0.055	0.4345	0.2295	0.0375
YBR242W	YBR242W	0.1012	-0.0615	0.0199	0.115	0.2308	0.0427
YBR244W	GPX2	0.8109	-0.1582	0.3263	0.6853	0.2369	0.0396
YBR245C	ISW1	0.0775	0.1267	0.1021	0.0348	0.2333	0.0432
YBR246W	YBR246W	0.0175	-0.1978	-0.0901	0.1522	0.2302	0.0466
YBR248C	HIS7	-0.311	-0.4303	-0.3706	0.0844	0.2234	0.0455
YBR250W	YBR250W	-0.5544	-0.3016	-0.428	0.1788	0.2227	0.0442
YBR255W	YBR255W	-0.0667	-0.3766	-0.2216	0.2192	0.2284	0.0432
YBR258C	SHG1	0.0645	-0.0926	-0.0141	0.1111	0.232	0.0419
YBR259W	YBR259W	-0.025	0.061	0.018	0.0608	0.2305	0.0397
YBR260C	RGD1	0.176	0.4942	0.3351	0.225	0.2374	0.0441
YBR261C	YBR261C	-0.1125	-0.2524	-0.1824	0.099	0.2274	0.0423
YBR262C	FMP51	0.0563	-0.297	-0.1203	0.2499	0.2303	0.0427
YBR263W	SHM1	-0.1663	-0.1926	-0.1795	0.0186	0.2262	0.0407
YBR264C	YPT10	0.3426	-0.2147	0.064	0.3941	0.2316	0.0424
YBR266C	YBR266C	-2.2521	-1.1344	-1.6933	0.7904	0.1946	0.0413
YBR267W	YBR267W	-0.5309	-0.4033	-0.4671	0.0902	0.2193	0.0457
YBR268W	MRPL37	-0.5745	-0.7151	-0.6448	0.0995	0.2138	0.0472
YBR269C	FMP21	-0.2726	0.6585	0.193	0.6584	0.2336	0.0397
YBR270C	YBR270C	0.0976	-0.1433	-0.0228	0.1703	0.2301	0.0435
YBR271W	YBR271W	0.0479	-0.0872	-0.0196	0.0955	0.2318	0.0427
YBR272C	HSM3	0.3799	0.0772	0.2285	0.214	0.2348	0.0425
YBR274W	CHK1	-0.0439	-0.184	-0.114	0.099	0.2305	0.0429
YBR275C	RIF1	-0.1004	0.485	0.1923	0.4139	0.2342	0.0435
YBR276C	PPS1	0.7616	0.6557	0.7086	0.0749	0.244	0.0429
YBR277C	YBR277C	0.2572	0.7969	0.527	0.3816	0.2392	0.0324
YBR278W	DPB3	-0.239	-0.0386	-0.1388	0.1417	0.2296	0.0396
YBR280C	YBR280C	-0.0353	-0.2252	-0.1302	0.1343	0.2305	0.0429
YBR281C	YBR281C	-0.084	0.0254	-0.0293	0.0774	0.23	0.0437
YBR282W	MRPL27	-0.2927	-0.1296	-0.2112	0.1153	0.2287	0.0424
YBR283C	SSH1	0.2169	0.5568	0.3868	0.2404	0.2385	0.0471
YBR284W	YBR284W	-0.2868	0.254	-0.0164	0.3824	0.2303	0.0447
YBR285W	YBR285W	-0.0344	-0.1216	-0.078	0.0617	0.2308	0.0423
YBR286W	APE3	0.2965	0.2565	0.2765	0.0283	0.2353	0.0425
YBR287W	YBR287W	0.3081	0.1715	0.2398	0.0966	0.2342	0.0418
YBR288C	APM3	-0.0343	-0.3515	-0.1929	0.2243	0.2278	0.0456
YBR290W	BSD2	-0.2008	-0.2934	-0.2471	0.0655	0.2326	0.039
YBR291C	CTP1	0.1133	0.1476	0.1304	0.0243	0.2343	0.0416
YBR292C	YBR292C	0.4464	0.026	0.2362	0.2973	0.2338	0.0409
YBR293W	YBR293W	0.3411	0.4618	0.4014	0.0853	0.2376	0.0393
YBR294W	SUL1	0.0491	0.1062	0.0776	0.0404	0.2314	0.0422
YBR295W	PCA1	0.2557	0.6377	0.4467	0.2701	0.2385	0.0422
YBR296C	PHO89	-0.0074	-0.164	-0.0857	0.1108	0.2305	0.0429
YBR297W	MAL33	0.035	0.0466	0.0408	0.0082	0.2372	0.0443
YBR298C	MAL31	1.0794	0.4148	0.7471	0.47	0.2448	0.0404
YBR299W	MAL32	0.285	-0.1503	0.0673	0.3078	0.2315	0.0419
YBR300C	YBR300C	-0.1244	-0.1754	-0.1499	0.0361	0.228	0.0434
YBR301W	DAN3	0.0332	0.3604	0.1968	0.2313	0.2332	0.0418
YCL001W	RER1	0.3686	0.127	0.2478	0.1708	0.2346	0.0425
YCL001W-A	YCL001W-A	0.0418	-0.1554	-0.0568	0.1394	0.225	0.0431
YCL002C	YCL002C	0.1412	-0.2023	-0.0305	0.2428	0.2302	0.0437
YCL005W	YCL005W	1.2201	1.6023	1.4112	0.2702	0.2598	0.0362
YCL006C	YCL006C	0.282	0.7486	0.5153	0.3299	0.2374	0.0349
YCL008C	STP22	-0.9265	-1.1334	-1.03	0.1463	0.2114	0.0461
YCL009C	ILV6	0.1162	0.0288	0.0725	0.0618	0.2319	0.0428
YCL010C	SGF29	0.1872	0.0264	0.1068	0.1137	0.2323	0.042
YCL011C	GBP2	0.4769	0.2202	0.3486	0.1815	0.2461	0.0371
YCL012W	YCL012W	0.2839	0.0972	0.1906	0.132	0.233	0.0413
YCL013W	YCL013W	0.045	0.1198	0.0824	0.0529	0.2315	0.0428
YCL014W	BUD3	-0.3183	-0.1007	-0.2095	0.1538	0.2266	0.0435
YCL016C	DCC1	0.1322	0.1332	0.1327	0.0007	0.2322	0.0413
YCL022C	YCL022C	0.3302	-0.0192	0.1555	0.2471	0.2329	0.0412
YCL023C	YCL023C	-0.1198	-0.0395	-0.0797	0.0568	0.2291	0.0454
YCL024W	KCC4	0.2288	0.425	0.3269	0.1387	0.233	0.0381
YCL025C	AGP1	0.3638	0.0063	0.1851	0.2528	0.234	0.0431
YCL026C	YCL026C	0.2374	0.0467	0.142	0.1348	0.2385	0.0396
YCL026C-A	FRM2	0.0877	0.2565	0.1721	0.1194	0.233	0.0416
YCL027W	FUS1	0.0049	0.3826	0.1938	0.2671	0.233	0.0404
YCL028W	RNQ1	0.3374	-0.2678	0.0348	0.4279	0.231	0.0423
YCL029C	BIK1	0.1071	0.0123	0.0597	0.0671	0.2307	0.0402
YCL030C	HIS4	0.2613	-0.2664	-0.0025	0.3731	0.2296	0.0464
YCL032W	STE50	0.0052	-0.2069	-0.1008	0.15	0.2269	0.0415
YCL033C	YCL033C	0.5044	0.0545	0.2794	0.3181	0.2355	0.0448
YCL034W	LSB5	0.0517	-0.1895	-0.0689	0.1705	0.2341	0.0446
YCL035C	GRX1	0.1157	0.2687	0.1922	0.1082	0.2337	0.0428
YCL036W	GFD2	0.6286	0.401	0.5148	0.1609	0.2392	0.0483
YCL037C	SRO9	0.3998	0.9269	0.6633	0.3727	0.2427	0.0417
YCL038C	ATG22	0.1257	-0.1401	-0.0072	0.1879	0.2291	0.045
YCL039W	GID7	0.3032	-0.168	0.0676	0.3332	0.2318	0.0432
YCL040W	GLK1	0.2664	-0.0777	0.0944	0.2433	0.232	0.0423
YCL042W	YCL042W	0.1521	-0.0366	0.0577	0.1335	0.2316	0.0429
YCL044C	YCL044C	-0.0074	-0.2095	-0.1084	0.1429	0.2305	0.0429
YCL045C	YCL045C	0.086	0.4451	0.2656	0.2539	0.2341	0.04
YCL046W	YCL046W	0.3353	-0.0222	0.1566	0.2528	0.237	0.0407
YCL047C	YCL047C	0.0776	-0.2967	-0.1096	0.2647	0.2289	0.0434
YCL048W	YCL048W	0.0675	0.26	0.1637	0.1362	0.2331	0.0425
YCL049C	YCL049C	0.1533	0.1538	0.1535	0.0004	0.2322	0.0402
YCL050C	APA1	1.1689	0.5693	0.8691	0.424	0.2475	0.0407
YCL051W	LRE1	0.0464	-0.1228	-0.0382	0.1196	0.2299	0.0408
YCL055W	KAR4	1.129	0.633	0.881	0.3507	0.244	0.0367
YCL056C	YCL056C	0.1604	0.3198	0.2401	0.1127	0.2353	0.0445
YCL057W	PRD1	0.0011	-0.2008	-0.0999	0.1428	0.2283	0.0416
YCL058C	FYV5	-0.8753	-0.9528	-0.914	0.0548	0.2122	0.0441
YCL060C	YCL060C	0.4785	0.4381	0.4583	0.0286	0.2406	0.0467
YCL061C	MRC1	0.7547	0.4146	0.5847	0.2405	0.2404	0.0388
YCL062W	YCL062W	-0.6092	-0.1739	-0.3915	0.3078	0.223	0.0431
YCL063W	VAC17	0.1022	-0.1311	-0.0145	0.165	0.231	0.0454
YCL064C	CHA1	-0.0439	-0.1728	-0.1084	0.0911	0.2276	0.0446
YCL069W	YCL069W	0.3046	0.1024	0.2035	0.143	0.2345	0.0434
YCL074W	YCL074W	0.0464	-0.2095	-0.0815	0.1809	0.2305	0.0429
YCL075W	YCL075W	0.462	-0.0247	0.2187	0.3441	0.2315	0.0396
YCL076W	YCL076W	0.0358	-0.1766	-0.0704	0.1502	0.2305	0.0429
YCR001W	YCR001W	0.0063	0.2769	0.1416	0.1913	0.2324	0.041
YCR002C	CDC10	1.6576	1.713	1.6853	0.0392	0.2594	0.0387
YCR003W	MRPL32	-0.6594	-1.048	-0.8537	0.2747	0.2142	0.0471
YCR004C	YCP4	-0.2784	-1.0264	-0.6524	0.5289	0.2184	0.0451
YCR005C	CIT2	0.2076	0.1336	0.1706	0.0523	0.2331	0.0414
YCR006C	YCR006C	0.5786	0.5237	0.5512	0.0388	0.2399	0.0337
YCR007C	YCR007C	0.2838	0.4162	0.35	0.0937	0.2349	0.0371
YCR008W	SAT4	0.0589	0.2268	0.1429	0.1187	0.2325	0.0428
YCR009C	RVS161	-1.5902	-1.5348	-1.5625	0.0392	0.1671	0.0532
YCR010C	ADY2	-0.216	0.3006	0.0423	0.3653	0.2305	0.0393
YCR011C	ADP1	-0.0406	0.0926	0.026	0.0942	0.2309	0.0428
YCR014C	POL4	0.3173	0.2604	0.2889	0.0402	0.236	0.043
YCR015C	YCR015C	0.2966	-0.0399	0.1284	0.2379	0.2326	0.0425
YCR016W	YCR016W	-0.204	-0.4231	-0.3136	0.1549	0.225	0.0404
YCR017C	CWH43	-0.313	-0.2942	-0.3036	0.0133	0.2248	0.0468
YCR019W	MAK32	0.4907	0.476	0.4834	0.0104	0.2394	0.0432
YCR020C	PET18	0.1695	-0.2985	-0.0645	0.331	0.2293	0.0424
YCR020C-A	MAK31	0.0648	0.1884	0.1266	0.0874	0.2336	0.043
YCR020W-B	HTL1	0.9841	1.0103	0.9972	0.0185	0.2501	0.0514
YCR021C	HSP30	-0.2202	0.0573	-0.0815	0.1962	0.2282	0.0415
YCR022C	YCR022C	0.1407	-0.1383	0.0012	0.1973	0.2293	0.0404
YCR023C	YCR023C	0.1771	0.0058	0.0915	0.1211	0.2314	0.0412
YCR024C-A	PMP1	0.1737	0.2339	0.2038	0.0425	0.2364	0.0426
YCR025C	YCR025C	0.2813	0.7124	0.4969	0.3049	0.2381	0.0398
YCR026C	YCR026C	-0.0138	0.1281	0.0572	0.1003	0.2317	0.0431
YCR027C	RHB1	0.084	-0.3062	-0.1111	0.2759	0.2306	0.0441
YCR028C	FEN2	0.2694	0.4404	0.3549	0.1209	0.2344	0.0381
YCR028C-A	RIM1	-0.7649	-1.0508	-0.9079	0.2021	0.2137	0.0428
YCR030C	SYP1	0.0027	-0.0164	-0.0069	0.0135	0.2302	0.0434
YCR031C	RPS14A	-0.8744	-0.5989	-0.7367	0.1948	0.218	0.0423
YCR032W	BPH1	0.3424	-0.0353	0.1536	0.2671	0.2326	0.0416
YCR033W	SNT1	0.6642	0.6056	0.6349	0.0414	0.2409	0.0403
YCR034W	FEN1	-1.946	-1.6905	-1.8183	0.1807	0.1929	0.0484
YCR036W	RBK1	0.0878	0.2958	0.1918	0.1471	0.2334	0.0412
YCR037C	PHO87	0.5997	1.1488	0.8743	0.3883	0.249	0.0431
YCR043C	YCR043C	-0.0174	0.2842	0.1334	0.2132	0.2363	0.0374
YCR045C	YCR045C	0.1822	0.2365	0.2094	0.0384	0.2338	0.0416
YCR046C	IMG1	-0.1321	-0.596	-0.3641	0.328	0.2219	0.0432
YCR048W	ARE1	0.2488	0.027	0.1379	0.1569	0.2318	0.0418
YCR049C	YCR049C	0.4978	-0.0543	0.2218	0.3904	0.2345	0.0434
YCR050C	YCR050C	0.313	0.6727	0.4928	0.2543	0.2376	0.0364
YCR051W	YCR051W	-0.1503	-0.1804	-0.1654	0.0213	0.2294	0.0434
YCR053W	THR4	0.1897	0.1399	0.1648	0.0352	0.2332	0.0427
YCR059C	YIH1	0.1554	0.2663	0.2108	0.0784	0.2326	0.0399
YCR060W	YCR060W	0.0118	-0.0899	-0.0391	0.0719	0.2294	0.0409
YCR061W	YCR061W	-0.2116	-0.1745	-0.1931	0.0263	0.2292	0.0442
YCR062W	YCR062W	0.3701	0.489	0.4296	0.0841	0.2392	0.0456
YCR065W	HCM1	-0.538	-0.0995	-0.3188	0.3101	0.2269	0.0444
YCR066W	RAD18	0.074	0.3023	0.1881	0.1614	0.2336	0.0419
YCR067C	SED4	0.1019	-0.0558	0.0231	0.1115	0.2307	0.0427
YCR068W	ATG15	-0.2369	0.0004	-0.1183	0.1678	0.2283	0.0437
YCR069W	CPR4	0.0881	-0.0194	0.0343	0.076	0.2308	0.0423
YCR071C	IMG2	-0.7414	-0.9936	-0.8675	0.1783	0.2149	0.0444
YCR073C	SSK22	-0.0569	-0.2099	-0.1334	0.1082	0.2281	0.0433
YCR073W-A	SOL2	0.047	0.3391	0.1931	0.2065	0.2367	0.0427
YCR075C	ERS1	-0.1552	0.2087	0.0268	0.2573	0.2307	0.0421
YCR076C	YCR076C	-0.0001	-0.0721	-0.0361	0.0509	0.2294	0.0414
YCR077C	PAT1	0.0205	-0.2252	-0.1024	0.1738	0.2305	0.0429
YCR079W	YCR079W	0.3722	0.3685	0.3703	0.0026	0.2375	0.0435
YCR081W	SRB8	-0.0074	-0.2095	-0.1084	0.1429	0.2305	0.0429
YCR084C	TUP1	-1.2279	-0.6912	-0.9596	0.3795	0.2121	0.0461
YCR085W	YCR085W	-0.2171	0.5047	0.1438	0.5104	0.2331	0.043
YCR086W	CSM1	-0.0361	-0.1198	-0.078	0.0592	0.2307	0.0425
YCR087C-A	YCR087C-A	-0.1821	0.6688	0.2433	0.6017	0.235	0.0405
YCR087W	YCR087W	0.3149	0.2925	0.3037	0.0158	0.2354	0.0404
YCR088W	ABP1	-0.413	-0.1819	-0.2974	0.1634	0.2252	0.042
YCR089W	FIG2	0.2895	-0.166	0.0617	0.3221	0.2316	0.043
YCR090C	YCR090C	0.237	0.051	0.144	0.1315	0.2326	0.0421
YCR091W	KIN82	0.0052	-0.2252	-0.11	0.163	0.2305	0.0429
YCR092C	MSH3	-0.0504	-0.049	-0.0497	0.001	0.2281	0.0421
YCR094W	CDC50	-0.1203	0.2414	0.0606	0.2558	0.2379	0.0485
YCR095C	YCR095C	-0.2366	-0.321	-0.2788	0.0596	0.2274	0.043
YCR098C	GIT1	0.2327	0.2515	0.2421	0.0133	0.2342	0.0414
YCR099C	YCR099C	-0.2996	-0.1731	-0.2364	0.0895	0.2281	0.0425
YCR100C	YCR100C	0.108	-0.1091	-0.0005	0.1535	0.2324	0.0431
YCR101C	YCR101C	0.0205	-0.2688	-0.1242	0.2046	0.2305	0.0429
YCR102C	YCR102C	0.0484	-0.2561	-0.1039	0.2153	0.2321	0.0419
YCR102W-A	YCR102W-A	0.3994	0.2607	0.3301	0.0981	0.236	0.0418
YCR105W	ADH7	-0.2443	0.3296	0.0427	0.4058	0.231	0.0423
YCR106W	RDS1	0.1402	0.204	0.1721	0.0451	0.2316	0.0397
YCR107W	AAD3	0.4277	0.7481	0.5879	0.2265	0.2376	0.0373
YDL001W	RMD1	-0.6483	-0.3076	-0.4779	0.2409	0.224	0.0445
YDL002C	NHP10	-1.3639	-1.0197	-1.1918	0.2434	0.2075	0.0459
YDL006W	PTC1	-1.6168	-1.2087	-1.4128	0.2886	0.205	0.0446
YDL009C	YDL009C	0.6178	0.5515	0.5846	0.0468	0.2416	0.0403
YDL010W	YDL010W	0.0327	0.0968	0.0647	0.0453	0.2308	0.0374
YDL011C	YDL011C	-0.1663	-0.3094	-0.2378	0.1012	0.2284	0.0442
YDL012C	YDL012C	-0.2729	-0.0128	-0.1428	0.1839	0.2303	0.0432
YDL013W	HEX3	-0.6588	-0.3126	-0.4857	0.2448	0.2208	0.0504
YDL018C	ERP3	-0.185	0.0462	-0.0694	0.1635	0.2292	0.043
YDL019C	OSH2	0.0205	-0.2436	-0.1115	0.1867	0.2281	0.0436
YDL020C	RPN4	-0.2203	-0.1945	-0.2074	0.0182	0.2268	0.0447
YDL021W	GPM2	0.9517	1.5839	1.2678	0.447	0.258	0.0445
YDL022W	GPD1	0.0697	0.2483	0.159	0.1263	0.2331	0.0424
YDL023C	SRF4	0.2914	0.306	0.2987	0.0104	0.2352	0.0411
YDL024C	DIA3	-0.0364	0.2659	0.1148	0.2138	0.2285	0.0418
YDL025C	YDL025C	0.184	0.4739	0.329	0.205	0.2353	0.0406
YDL026W	YDL026W	-0.2327	-0.0759	-0.1543	0.1109	0.2274	0.0418
YDL027C	YDL027C	0.3476	-0.0435	0.152	0.2765	0.2329	0.0418
YDL032W	YDL032W	0.0381	-0.5575	-0.2597	0.4212	0.2259	0.0432
YDL033C	YDL033C	-0.0176	-0.6117	-0.3147	0.4201	0.2246	0.0426
YDL034W	YDL034W	0.3098	0.0128	0.1613	0.21	0.2332	0.0423
YDL035C	GPR1	-0.8711	-0.3017	-0.5864	0.4027	0.2194	0.042
YDL036C	YDL036C	-0.2789	-0.3155	-0.2972	0.0259	0.2186	0.0442
YDL037C	BSC1	0.064	0.5437	0.3039	0.3392	0.2362	0.042
YDL038C	YDL038C	0.2442	0.3334	0.2888	0.063	0.2336	0.0394
YDL039C	PRM7	0.1338	-0.1166	0.0086	0.177	0.2306	0.0427
YDL041W	YDL041W	-0.279	-0.1845	-0.2318	0.0668	0.2263	0.0441
YDL042C	SIR2	0.2658	0.4474	0.3566	0.1284	0.238	0.0448
YDL044C	MTF2	-0.2331	-0.3109	-0.272	0.055	0.2281	0.0462
YDL045W-A	MRP10	-0.597	-0.9216	-0.7593	0.2295	0.2168	0.0443
YDL046W	NPC2	0.358	0.1377	0.2479	0.1557	0.2339	0.0408
YDL047W	SIT4	-0.107	-0.2392	-0.1731	0.0935	0.2279	0.0471
YDL048C	STP4	-0.0598	0.4334	0.1868	0.3487	0.2343	0.0435
YDL049C	KNH1	-0.4799	-0.8029	-0.6414	0.2284	0.2206	0.0442
YDL050C	YDL050C	0.7277	0.3726	0.5501	0.2511	0.2422	0.0414
YDL051W	LHP1	0.0242	0.5488	0.2865	0.371	0.2348	0.0389
YDL052C	SLC1	0.1705	-0.3281	-0.0788	0.3525	0.2291	0.0431
YDL053C	PBP4	0.0636	-0.3322	-0.1343	0.2798	0.2291	0.0459
YDL054C	MCH1	-0.1765	-0.0257	-0.1011	0.1067	0.2285	0.0419
YDL056W	MBP1	-0.1498	0.1803	0.0152	0.2334	0.231	0.0436
YDL057W	YDL057W	-0.4855	-0.9443	-0.7149	0.3244	0.2174	0.044
YDL059C	RAD59	0.1662	0.1584	0.1623	0.0056	0.2334	0.0423
YDL061C	RPS29B	-0.0912	-0.2252	-0.1582	0.0948	0.2236	0.045
YDL063C	YDL063C	-1.12	-1.5122	-1.3161	0.2773	0.2061	0.0431
YDL065C	PEX19	-0.044	-0.2334	-0.1387	0.1339	0.2264	0.0372
YDL066W	IDP1	0.1718	0.0574	0.1146	0.0809	0.2334	0.0389
YDL067C	COX9	-0.1292	-1.1508	-0.64	0.7223	0.2187	0.0462
YDL068W	YDL068W	-0.1637	-0.5988	-0.3812	0.3077	0.2229	0.0433
YDL069C	CBS1	-0.1882	-0.5797	-0.3839	0.2768	0.2255	0.0458
YDL070W	BDF2	-0.0322	-0.2404	-0.1363	0.1472	0.2301	0.0429
YDL071C	YDL071C	-0.4514	-0.2927	-0.372	0.1122	0.2238	0.0428
YDL073W	YDL073W	0.9668	1.6081	1.2875	0.4534	0.2656	0.0436
YDL074C	BRE1	0.4516	1.2224	0.837	0.545	0.2506	0.0467
YDL075W	RPL31A	-1.1081	-1.1367	-1.1224	0.0202	0.211	0.0418
YDL076C	RXT3	0.2433	0.2988	0.271	0.0393	0.2366	0.0427
YDL077C	VAM6	-0.0074	-0.2436	-0.1255	0.167	0.2305	0.0429
YDL077C	VAM6	-0.0074	-0.2069	-0.1071	0.1411	0.2305	0.0429
YDL078C	MDH3	0.0914	0.4004	0.2459	0.2184	0.2341	0.0413
YDL079C	MRK1	-0.594	0.109	-0.2425	0.4971	0.2263	0.0373
YDL080C	THI3	0.1532	0.0699	0.1116	0.0589	0.2339	0.0437
YDL081C	RPP1A	0.5643	0.2873	0.4258	0.1959	0.2389	0.048
YDL082W	RPL13A	-0.972	-0.9287	-0.9503	0.0306	0.2117	0.0418
YDL085W	NDE2	0.2266	-0.1982	0.0142	0.3003	0.2313	0.0443
YDL086W	YDL086W	-0.0428	-0.1319	-0.0874	0.063	0.2289	0.0436
YDL088C	ASM4	0.8365	0.7368	0.7867	0.0704	0.2456	0.0408
YDL089W	YDL089W	-0.1174	-0.2832	-0.2003	0.1172	0.2288	0.0431
YDL090C	RAM1	0.2198	-0.1288	0.0455	0.2465	0.2315	0.0427
YDL091C	YDL091C	0.0091	0.0233	0.0162	0.01	0.2314	0.045
YDL093W	PMT5	0.0423	-0.2805	-0.1191	0.2283	0.2299	0.0426
YDL094C	YDL094C	0.6672	-0.0115	0.3278	0.4799	0.2373	0.0398
YDL095W	PMT1	0.0175	-0.4631	-0.2228	0.3398	0.2267	0.0417
YDL096C	YDL096C	-0.121	-0.201	-0.161	0.0566	0.2279	0.0441
YDL099W	YDL099W	0.016	-0.1768	-0.0804	0.1363	0.2294	0.0442
YDL100C	ARR4	0.0991	-0.1707	-0.0358	0.1908	0.2295	0.0441
YDL101C	DUN1	-0.5084	-0.302	-0.4052	0.146	0.2226	0.047
YDL104C	QRI7	-0.4473	-0.6999	-0.5736	0.1786	0.2221	0.045
YDL106C	PHO2	-0.4952	-0.4027	-0.4489	0.0654	0.2224	0.0437
YDL107W	MSS2	-0.3074	-0.4705	-0.3889	0.1154	0.2124	0.0442
YDL109C	YDL109C	0.0791	0.1694	0.1242	0.0638	0.2316	0.0403
YDL110C	YDL110C	0.2136	-0.1407	0.0364	0.2506	0.231	0.043
YDL112W	TRM3	-0.0439	-0.1895	-0.1167	0.1029	0.2273	0.0432
YDL113C	ATG20	-0.1796	-0.7622	-0.4709	0.412	0.2222	0.0442
YDL114W	YDL114W	0.0006	0.2717	0.1362	0.1918	0.2326	0.0426
YDL115C	IWR1	0.0122	0.1424	0.0773	0.0921	0.2318	0.0585
YDL116W	NUP84	-0.5432	-0.8262	-0.6847	0.2001	0.2193	0.0436
YDL117W	CYK3	-0.4161	-0.4306	-0.4234	0.0103	0.2228	0.044
YDL118W	YDL118W	-0.3394	-0.6551	-0.4972	0.2233	0.2221	0.0446
YDL119C	YDL119C	0.8838	-0.056	0.4139	0.6646	0.2385	0.043
YDL121C	YDL121C	0.0543	-0.0126	0.0209	0.0474	0.2306	0.0423
YDL122W	UBP1	-0.0431	-0.0463	-0.0447	0.0023	0.229	0.0415
YDL123W	SNA4	-0.0094	-0.1445	-0.0769	0.0955	0.2375	0.038
YDL124W	YDL124W	0.1068	0.4314	0.2691	0.2295	0.2333	0.0369
YDL125C	HNT1	0.4637	0.1927	0.3282	0.1916	0.2376	0.0435
YDL127W	PCL2	-0.1405	-0.2561	-0.1983	0.0818	0.2249	0.0454
YDL128W	VCX1	-0.0558	0.1634	0.0538	0.155	0.2316	0.0426
YDL129W	YDL129W	0.1033	-0.3819	-0.1393	0.3431	0.2225	0.0438
YDL130W	RPP1B	-0.9442	-0.5202	-0.7322	0.2998	0.2174	0.0436
YDL130W-A	STF1	0.412	0.3271	0.3695	0.0601	0.2344	0.0379
YDL131W	LYS21	0.2488	-0.1168	0.066	0.2585	0.2315	0.0415
YDL133C-A	RPL41B	0.4278	0.0468	0.2373	0.2694	0.2348	0.0431
YDL133W	YDL133W	0.1974	-0.002	0.0977	0.141	0.2319	0.0419
YDL134C	PPH21	-0.3463	-0.0301	-0.1882	0.2236	0.227	0.0446
YDL134C-A	YDL134C-A	1.0982	0.7613	0.9297	0.2382	0.2476	0.0376
YDL136W	RPL35B	-0.8894	-1.005	-0.9472	0.0817	0.2133	0.0427
YDL137W	ARF2	0.2455	-0.0124	0.1166	0.1824	0.2325	0.0424
YDL138W	RGT2	0.4028	0.2917	0.3472	0.0785	0.237	0.039
YDL142C	CRD1	-0.1534	-0.3013	-0.2274	0.1046	0.2248	0.0418
YDL144C	YDL144C	0.074	-0.1966	-0.0613	0.1914	0.2291	0.0408
YDL149W	ATG9	-0.1005	0.068	-0.0162	0.1192	0.2298	0.0425
YDL151C	BUD30	-0.3715	-0.4661	-0.4188	0.0669	0.2234	0.0414
YDL154W	MSH5	-0.373	0.2398	-0.0666	0.4333	0.2293	0.0433
YDL155W	CLB3	-0.2944	0.0045	-0.1449	0.2113	0.2298	0.043
YDL156W	YDL156W	0.0619	0.3549	0.2084	0.2072	0.2337	0.0416
YDL157C	YDL157C	0.2089	-0.0504	0.0792	0.1834	0.2321	0.043
YDL159W	STE7	0.0564	0.2738	0.1651	0.1537	0.2332	0.0421
YDL161W	ENT1	-0.0708	0.3366	0.1329	0.2881	0.2322	0.0417
YDL162C	YDL162C	0.1232	0.1283	0.1257	0.0036	0.2323	0.0419
YDL168W	SFA1	0.131	-0.1845	-0.0267	0.2231	0.2296	0.0324
YDL169C	UGX2	0.0613	0.1328	0.0971	0.0506	0.2337	0.0422
YDL170W	UGA3	-0.0724	0.0475	-0.0125	0.0848	0.2297	0.0425
YDL171C	GLT1	-0.2264	-0.1338	-0.1801	0.0655	0.2269	0.0415
YDL172C	YDL172C	-0.0624	-0.1077	-0.085	0.0321	0.231	0.0434
YDL173W	YDL173W	0.2156	0.3958	0.3057	0.1274	0.2365	0.0437
YDL174C	DLD1	0.5226	0.4045	0.4635	0.0835	0.2385	0.0412
YDL175C	AIR2	0.0705	0.0548	0.0627	0.0111	0.2326	0.0435
YDL176W	YDL176W	-0.0448	-0.2252	-0.135	0.1276	0.2305	0.0429
YDL177C	YDL177C	0.2169	0.1482	0.1825	0.0486	0.2328	0.0413
YDL178W	DLD2	-0.0485	-0.0383	-0.0434	0.0072	0.2297	0.043
YDL179W	PCL9	0.0971	-0.0788	0.0091	0.1244	0.2307	0.0428
YDL180W	YDL180W	0.2409	0.0821	0.1615	0.1123	0.2328	0.0414
YDL181W	INH1	0.1266	0.0914	0.109	0.0249	0.2337	0.0411
YDL182W	LYS20	-0.9326	-0.8057	-0.8691	0.0897	0.2144	0.0449
YDL183C	YDL183C	-0.151	-0.2986	-0.2248	0.1044	0.2283	0.0431
YDL184C	RPL41A	-0.1669	0.0767	-0.0451	0.1722	0.229	0.0464
YDL186W	YDL186W	-0.0701	-0.4014	-0.2358	0.2342	0.2256	0.0397
YDL187C	YDL187C	-0.0857	0.4947	0.2045	0.4104	0.2328	0.0403
YDL188C	PPH22	-0.0074	-0.2069	-0.1071	0.1411	0.2305	0.0429
YDL189W	RBS1	0.0482	-0.0998	-0.0258	0.1046	0.2318	0.0428
YDL190C	UFD2	-0.2046	-0.3277	-0.2661	0.087	0.2259	0.0449
YDL191W	RPL35A	-0.267	-0.4421	-0.3545	0.1238	0.2261	0.0437
YDL194W	SNF3	-0.2365	-0.1688	-0.2027	0.0479	0.2285	0.0417
YDL197C	ASF2	0.1166	0.2131	0.1648	0.0683	0.2426	0.0441
YDL199C	YDL199C	0.02	-0.0624	-0.0212	0.0583	0.2297	0.0409
YDL200C	MGT1	-0.1469	-0.2146	-0.1807	0.0479	0.2265	0.0438
YDL201W	TRM8	-0.1453	-0.1298	-0.1376	0.011	0.2281	0.0447
YDL203C	YDL203C	0.4405	0.4929	0.4667	0.037	0.2386	0.0415
YDL204W	RTN2	-0.3567	-0.5718	-0.4642	0.1521	0.2224	0.0436
YDL206W	YDL206W	-1.3402	-0.6848	-1.0125	0.4634	0.2104	0.0473
YDL210W	UGA4	0.6686	0.3421	0.5054	0.2309	0.2364	0.0429
YDL211C	YDL211C	-0.0313	-0.16	-0.0957	0.091	0.2352	0.0495
YDL213C	NOP6	0.1823	-0.1696	0.0064	0.2488	0.2305	0.043
YDL214C	PRR2	0.0205	-0.2537	-0.1166	0.1939	0.2304	0.0431
YDL215C	GDH2	-0.3075	0.4991	0.0958	0.5704	0.2319	0.0428
YDL216C	RRI1	0.1281	0.1865	0.1573	0.0412	0.233	0.0417
YDL218W	YDL218W	-0.1925	-0.1146	-0.1536	0.055	0.2276	0.0425
YDL219W	DTD1	0.2339	-0.102	0.0659	0.2375	0.2315	0.0427
YDL222C	FMP45	0.0076	-0.187	-0.0897	0.1376	0.2291	0.0435
YDL223C	HBT1	-0.1287	-0.1191	-0.1239	0.0068	0.2275	0.0395
YDL224C	WHI4	-0.2224	-0.4711	-0.3468	0.1758	0.2244	0.0435
YDL225W	SHS1	-0.7549	-0.4285	-0.5917	0.2308	0.2203	0.045
YDL226C	GCS1	-0.4528	-0.5708	-0.5118	0.0834	0.2201	0.0438
YDL227C	HO	0.2546	-0.1302	0.0622	0.2721	0.2318	0.0451
YDL229W	SSB1	0.6944	0.1416	0.418	0.3909	0.2369	0.0402
YDL230W	PTP1	-0.2286	-0.045	-0.1368	0.1298	0.2278	0.0418
YDL231C	BRE4	-0.1617	-0.1769	-0.1693	0.0108	0.2296	0.0444
YDL232W	OST4	-0.7992	-0.7739	-0.7866	0.0179	0.2179	0.0547
YDL233W	YDL233W	-0.2406	0.0315	-0.1046	0.1924	0.2291	0.0453
YDL234C	GYP7	-0.1727	0.4222	0.1248	0.4207	0.2328	0.0417
YDL236W	PHO13	-0.3412	-0.2029	-0.272	0.0978	0.2254	0.0417
YDL237W	YDL237W	0.1582	-0.2679	-0.0548	0.3013	0.2295	0.0424
YDL238C	YDL238C	-0.038	-0.0519	-0.0449	0.0099	0.2297	0.0436
YDL239C	ADY3	0.239	0.1651	0.202	0.0522	0.2392	0.0386
YDL240W	LRG1	-0.0074	-0.3084	-0.1579	0.2128	0.2305	0.0429
YDL241W	YDL241W	-0.1751	-0.1657	-0.1704	0.0066	0.2353	0.0369
YDL242W	YDL242W	-0.2114	0.5075	0.1481	0.5083	0.2317	0.0397
YDL243C	AAD4	-0.4318	-0.581	-0.5064	0.1055	0.2221	0.0457
YDR001C	NTH1	-0.1937	-0.3888	-0.2912	0.1379	0.2271	0.0432
YDR003W	YDR003W	0.098	-0.0805	0.0087	0.1263	0.2348	0.0459
YDR004W	RAD57	0.0786	0.3247	0.2016	0.174	0.2338	0.0413
YDR005C	MAF1	0.0288	-0.3169	-0.144	0.2444	0.23	0.0437
YDR006C	SOK1	0.0348	0.0547	0.0448	0.0141	0.2336	0.0441
YDR007W	TRP1	0.267	-0.0238	0.1216	0.2056	0.2326	0.0416
YDR008C	YDR008C	0.4133	0.1632	0.2882	0.1768	0.2359	0.0407
YDR009W	GAL3	0.2468	-0.1309	0.058	0.2671	0.231	0.0418
YDR010C	YDR010C	0.1064	0.0793	0.0928	0.0191	0.2304	0.0398
YDR011W	SNQ2	0.1377	0.3131	0.2254	0.1241	0.2343	0.0428
YDR014W	RAD61	0.2747	0.1863	0.2305	0.0625	0.2334	0.0407
YDR015C	YDR015C	0.5336	0.4008	0.4672	0.0939	0.2373	0.0393
YDR017C	KCS1	-0.1295	-0.6053	-0.3674	0.3364	0.2226	0.0494
YDR018C	YDR018C	0.1552	-0.3542	-0.0995	0.3602	0.2367	0.0379
YDR019C	GCV1	0.1128	-0.2005	-0.0438	0.2216	0.2312	0.0421
YDR020C	YDR020C	0.0449	0.4941	0.2695	0.3176	0.2347	0.0399
YDR022C	CIS1	-0.2317	0.1121	-0.0598	0.2431	0.2294	0.0454
YDR024W	FYV1	-0.0353	-0.241	-0.1381	0.1455	0.2305	0.0429
YDR025W	RPS11A	-0.4668	-0.6897	-0.5783	0.1576	0.2219	0.0442
YDR026C	YDR026C	0.3505	0.7689	0.5597	0.2959	0.241	0.0433
YDR028C	REG1	-0.9075	-0.6036	-0.7556	0.2149	0.2134	0.0511
YDR029W	YDR029W	-0.0178	-0.1169	-0.0673	0.0701	0.229	0.0417
YDR030C	RAD28	0.0269	0.2919	0.1594	0.1874	0.233	0.0425
YDR031W	YDR031W	-0.02	-0.2069	-0.1134	0.1322	0.2313	0.0421
YDR032C	PST2	-0.0074	-0.1798	-0.0936	0.1219	0.2305	0.0429
YDR033W	MRH1	-0.0766	0.0556	-0.0105	0.0935	0.2318	0.0419
YDR034C	LYS14	0.091	-0.2655	-0.0872	0.2521	0.2301	0.0443
YDR035W	ARO3	0.1596	0.1389	0.1492	0.0146	0.2316	0.0408
YDR036C	EHD3	0.1413	0.1799	0.1606	0.0273	0.2326	0.0404
YDR042C	YDR042C	-0.7288	-0.8823	-0.8055	0.1085	0.2151	0.0446
YDR043C	NRG1	-0.0532	-0.2078	-0.1305	0.1093	0.2337	0.0438
YDR046C	BAP3	0.1036	-0.2505	-0.0735	0.2504	0.2291	0.0433
YDR048C	YDR048C	-0.339	-0.0573	-0.1981	0.1992	0.2268	0.0433
YDR049W	YDR049W	-0.2072	-0.0016	-0.1044	0.1453	0.2295	0.0464
YDR051C	YDR051C	-0.0405	-0.0305	-0.0355	0.007	0.2294	0.0423
YDR055W	PST1	0.1145	0.1709	0.1427	0.0399	0.2324	0.0407
YDR056C	YDR056C	-0.1221	-0.1115	-0.1168	0.0075	0.23	0.043
YDR057W	YOS9	0.1413	0.8297	0.4855	0.4868	0.2416	0.0327
YDR058C	TGL2	0.0644	-0.1923	-0.0639	0.1816	0.2328	0.0459
YDR059C	UBC5	0.3145	0.0336	0.1741	0.1986	0.2324	0.0405
YDR061W	YDR061W	-0.341	-0.1561	-0.2485	0.1307	0.2262	0.0427
YDR063W	YDR063W	0.2872	-0.2325	0.0273	0.3675	0.2317	0.0446
YDR066C	YDR066C	-0.3248	-0.134	-0.2294	0.1349	0.2264	0.045
YDR067C	YDR067C	0.4441	-0.2239	0.1101	0.4723	0.2321	0.0428
YDR068W	DOS2	0.0866	-0.0436	0.0215	0.092	0.23	0.0406
YDR070C	FMP16	0.1401	0.0614	0.1007	0.0557	0.232	0.0423
YDR071C	PAA1	0.3531	0.0382	0.1956	0.2226	0.2333	0.0405
YDR072C	IPT1	-0.3534	-0.3301	-0.3418	0.0165	0.2245	0.0451
YDR073W	SNF11	-0.2067	-0.2088	-0.2077	0.0015	0.2267	0.0435
YDR074W	TPS2	0.8838	0.9249	0.9044	0.0291	0.247	0.0414
YDR075W	PPH3	0.3932	0.2479	0.3205	0.1027	0.2366	0.0424
YDR076W	RAD55	-0.1322	0.2942	0.081	0.3016	0.2319	0.0437
YDR077W	SED1	-0.0233	-0.1732	-0.0983	0.106	0.2287	0.0426
YDR078C	SHU2	0.2785	-0.2838	-0.0026	0.3976	0.2302	0.0474
YDR079W	PET100	-0.1958	-0.5131	-0.3544	0.2244	0.2241	0.0425
YDR080W	VPS41	-0.6964	-1.1784	-0.9374	0.3408	0.2038	0.052
YDR083W	RRP8	-1.3409	-0.782	-1.0614	0.3952	0.2106	0.0414
YDR084C	TVP23	0.2275	-0.2218	0.0028	0.3177	0.2306	0.0425
YDR085C	AFR1	0.0318	-0.2631	-0.1156	0.2085	0.2301	0.0428
YDR089W	YDR089W	0.3683	-0.2849	0.0417	0.4619	0.2334	0.0433
YDR090C	YDR090C	0.0404	0.0044	0.0224	0.0254	0.2311	0.0439
YDR092W	UBC13	-0.1079	-0.2709	-0.1894	0.1153	0.2281	0.0449
YDR093W	DNF2	-0.3009	-0.2157	-0.2583	0.0602	0.2276	0.0419
YDR094W	YDR094W	0.6189	0.3576	0.4883	0.1848	0.2401	0.0389
YDR095C	YDR095C	-0.0164	0.3335	0.1585	0.2475	0.2339	0.0434
YDR096W	GIS1	-0.0559	0.2784	0.1113	0.2364	0.2319	0.0388
YDR097C	MSH6	-0.1324	-0.1103	-0.1213	0.0156	0.231	0.0415
YDR098C	GRX3	-0.1896	0.3875	0.0989	0.408	0.2314	0.0401
YDR099W	BMH2	-0.2378	0.0925	-0.0727	0.2336	0.2293	0.0418
YDR100W	TVP15	0.0676	0.5146	0.2911	0.3161	0.2334	0.0371
YDR101C	ARX1	0.1117	-0.4252	-0.1568	0.3797	0.2244	0.0397
YDR102C	YDR102C	0.5232	0.2311	0.3771	0.2066	0.238	0.0437
YDR103W	STE5	0.3127	-0.3867	-0.037	0.4945	0.2276	0.0512
YDR104C	SPO71	-0.3706	0.1835	-0.0936	0.3918	0.2289	0.0427
YDR105C	TMS1	0.0077	-0.1565	-0.0744	0.1162	0.2299	0.0452
YDR107C	YDR107C	-0.0537	0.1238	0.035	0.1255	0.2312	0.043
YDR108W	GSG1	-0.2634	0.258	-0.0027	0.3686	0.2306	0.0434
YDR109C	YDR109C	0.7608	0.1162	0.4385	0.4558	0.2384	0.0413
YDR110W	FOB1	-0.051	-0.0445	-0.0478	0.0046	0.2301	0.0451
YDR111C	YDR111C	0.0802	0.293	0.1866	0.1505	0.2339	0.0428
YDR112W	YDR112W	0.1449	-0.2253	-0.0402	0.2618	0.2298	0.0434
YDR115W	YDR115W	-1.4253	-1.4799	-1.4526	0.0386	0.1906	0.0505
YDR117C	YDR117C	-0.2104	-0.1248	-0.1676	0.0606	0.2295	0.0433
YDR119W	YDR119W	0.2227	0.0992	0.1609	0.0874	0.2319	0.0393
YDR120C	TRM1	-0.4115	0.3674	-0.022	0.5508	0.2307	0.0448
YDR121W	DPB4	-0.1152	0.0071	-0.054	0.0865	0.2294	0.043
YDR122W	KIN1	-0.4121	-0.3318	-0.372	0.0568	0.2206	0.0399
YDR123C	INO2	-0.4254	-0.3595	-0.3925	0.0466	0.2254	0.0431
YDR124W	YDR124W	-0.2668	0.1315	-0.0676	0.2816	0.2295	0.0396
YDR125C	ECM18	0.0058	-0.096	-0.0451	0.072	0.231	0.0424
YDR126W	SWF1	0.0899	-0.6683	-0.2892	0.5361	0.2248	0.0441
YDR127W	ARO1	0.0697	0.2396	0.1547	0.1201	0.2339	0.0433
YDR128W	YDR128W	-0.3186	0.3946	0.038	0.5043	0.2307	0.0409
YDR129C	SAC6	0.0163	-1.3821	-0.6829	0.9888	0.2133	0.0625
YDR130C	FIN1	0.1821	0.0723	0.1272	0.0776	0.2332	0.0435
YDR131C	YDR131C	-0.137	0.1036	-0.0167	0.1702	0.2304	0.044
YDR132C	YDR132C	-0.1743	-0.1807	-0.1775	0.0045	0.2276	0.0442
YDR133C	YDR133C	-0.4237	0.1409	-0.1414	0.3992	0.2279	0.0417
YDR134C	YDR134C	-0.1186	-0.509	-0.3138	0.276	0.2249	0.0427
YDR135C	YCF1	0.0048	0.1759	0.0904	0.121	0.2321	0.0428
YDR136C	VPS61	-0.7493	0.0336	-0.3579	0.5536	0.2244	0.0384
YDR137W	RGP1	-0.1528	-0.3065	-0.2296	0.1087	0.2265	0.0433
YDR139C	RUB1	0.1953	-0.0936	0.0508	0.2043	0.2337	0.0438
YDR142C	PEX7	-0.1873	0.0993	-0.044	0.2027	0.2289	0.0385
YDR143C	SAN1	-0.1104	-0.2406	-0.1755	0.0921	0.2296	0.0431
YDR144C	MKC7	0.1657	-0.304	-0.0691	0.3322	0.2297	0.0446
YDR146C	SWI5	0.3648	-0.4013	-0.0183	0.5418	0.228	0.0461
YDR148C	KGD2	0.3982	-0.0915	0.1534	0.3463	0.2346	0.0411
YDR149C	YDR149C	0.3521	0.5179	0.435	0.1173	0.2396	0.0439
YDR150W	NUM1	0.2729	0.5371	0.405	0.1868	0.2384	0.0424
YDR151C	CTH1	0.1124	-0.0861	0.0132	0.1404	0.2302	0.0372
YDR152W	GIR2	-0.2273	0.0212	-0.103	0.1757	0.2287	0.0426
YDR153C	ENT5	-0.2054	-0.2792	-0.2423	0.0522	0.2249	0.037
YDR154C	YDR154C	-0.1828	-0.0336	-0.1082	0.1055	0.2308	0.0449
YDR155C	CPR1	-0.0631	-0.1798	-0.1215	0.0825	0.23	0.0434
YDR156W	RPA14	-0.2855	-0.3894	-0.3375	0.0735	0.2232	0.0413
YDR158W	HOM2	0.397	0.2021	0.2995	0.1379	0.2378	0.0426
YDR159W	SAC3	-0.4716	-0.1846	-0.3281	0.2029	0.2259	0.0386
YDR161W	YDR161W	0.0069	-0.2709	-0.132	0.1965	0.2281	0.0431
YDR162C	NBP2	-0.9053	-0.7397	-0.8225	0.1171	0.2157	0.0425
YDR163W	CWC15	0.3764	0.323	0.3497	0.0378	0.241	0.0353
YDR165W	TRM82	-0.1232	0.0918	-0.0157	0.152	0.2287	0.041
YDR169C	STB3	0.023	-0.0257	-0.0013	0.0345	0.2306	0.043
YDR171W	HSP42	-0.0983	-0.2964	-0.1973	0.1401	0.2288	0.0433
YDR174W	HMO1	-0.4725	-0.2983	-0.3854	0.1232	0.2248	0.0498
YDR175C	RSM24	-0.6154	-0.5978	-0.6066	0.0125	0.2167	0.0466
YDR176W	NGG1	0.4261	0.6272	0.5266	0.1422	0.241	0.0406
YDR179C	CSN9	0.2096	-0.0651	0.0722	0.1943	0.2327	0.0447
YDR179W-A	YDR179W-A	0.0844	0.0714	0.0779	0.0092	0.2315	0.0416
YDR181C	SAS4	-0.0067	-0.2619	-0.1343	0.1804	0.2273	0.0435
YDR183W	PLP1	0.0335	-0.0323	0.0006	0.0465	0.2304	0.042
YDR184C	ATC1	-0.4816	-0.4612	-0.4714	0.0144	0.2215	0.0419
YDR185C	YDR185C	-0.1756	-0.0836	-0.1296	0.065	0.2302	0.0435
YDR186C	YDR186C	-0.0396	-0.1868	-0.1132	0.1041	0.2308	0.0448
YDR191W	HST4	0.0263	-0.1473	-0.0605	0.1228	0.2265	0.0432
YDR192C	NUP42	-0.2835	-0.1992	-0.2413	0.0596	0.226	0.0426
YDR193W	YDR193W	0.1069	-0.215	-0.054	0.2276	0.2298	0.0437
YDR194C	MSS116	-0.4876	-0.9283	-0.7079	0.3116	0.2144	0.053
YDR195W	REF2	-0.4171	-0.5749	-0.496	0.1116	0.2184	0.0554
YDR197W	CBS2	-0.3474	-0.3517	-0.3496	0.003	0.2244	0.0435
YDR198C	YDR198C	0.8694	0.6425	0.7559	0.1604	0.2418	0.0341
YDR199W	YDR199W	-0.3496	-0.2797	-0.3147	0.0494	0.2251	0.0442
YDR200C	VPS64	0.004	-0.1895	-0.0927	0.1368	0.2343	0.0441
YDR202C	RAV2	-0.0579	-0.327	-0.1924	0.1903	0.2273	0.0453
YDR203W	YDR203W	0.668	0.1771	0.4226	0.3471	0.2387	0.0435
YDR204W	COQ4	-0.1571	-0.2549	-0.206	0.0691	0.2305	0.0429
YDR205W	MSC2	0.2238	0.1729	0.1983	0.036	0.2344	0.0423
YDR206W	EBS1	0.246	-0.0814	0.0823	0.2315	0.2327	0.0449
YDR207C	UME6	-0.6231	0.0942	-0.2644	0.5073	0.2276	0.0429
YDR209C	YDR209C	0.1479	-0.2691	-0.0606	0.2949	0.2291	0.042
YDR210W	YDR210W	-0.1206	-0.0155	-0.068	0.0743	0.2302	0.0409
YDR213W	UPC2	0.2684	0.0185	0.1434	0.1767	0.2317	0.0375
YDR214W	AHA1	0.5045	-0.2291	0.1377	0.5187	0.2316	0.039
YDR215C	YDR215C	0.1584	-0.0627	0.0478	0.1563	0.2312	0.0421
YDR216W	ADR1	0.9481	0.7437	0.8459	0.1446	0.254	0.038
YDR217C	RAD9	0.8096	0.7076	0.7586	0.0721	0.2515	0.0336
YDR218C	SPR28	0.0455	-0.221	-0.0878	0.1884	0.2295	0.0445
YDR219C	YDR219C	-0.3832	-0.3238	-0.3535	0.042	0.2261	0.0439
YDR220C	YDR220C	0.1273	-0.1136	0.0068	0.1703	0.23	0.0426
YDR221W	YDR221W	0.1767	0.3988	0.2877	0.1571	0.2344	0.04
YDR223W	YDR223W	0.5341	0.1596	0.3469	0.2648	0.2356	0.0399
YDR225W	HTA1	-0.3611	-0.0047	-0.1829	0.252	0.2272	0.0431
YDR226W	ADK1	0.9739	-0.2455	0.3642	0.8623	0.2384	0.0445
YDR227W	SIR4	-0.5664	-0.1134	-0.3399	0.3203	0.226	0.0424
YDR229W	IVY1	0.6563	0.196	0.4262	0.3254	0.2384	0.0424
YDR230W	YDR230W	-0.3211	-0.7862	-0.5537	0.3289	0.2188	0.0445
YDR231C	COX20	-0.5606	-1.3409	-0.9507	0.5517	0.2134	0.045
YDR233C	RTN1	0.2964	-0.4621	-0.0828	0.5364	0.2288	0.0424
YDR234W	LYS4	0.3004	0.1415	0.2209	0.1123	0.2341	0.042
YDR237W	MRPL7	-0.1845	-0.5664	-0.3755	0.27	0.2218	0.0399
YDR239C	YDR239C	-0.0309	0.1944	0.0818	0.1593	0.2313	0.0422
YDR241W	BUD26	-0.6301	-0.2814	-0.4558	0.2465	0.2222	0.044
YDR242W	AMD2	0.1152	-0.2928	-0.0888	0.2884	0.2304	0.0422
YDR244W	PEX5	-0.3886	0.345	-0.0218	0.5188	0.2319	0.0422
YDR247W	VHS1	0.3789	0.1489	0.2639	0.1626	0.2378	0.0464
YDR248C	YDR248C	-0.1711	-0.2273	-0.1992	0.0398	0.2289	0.0438
YDR249C	YDR249C	-0.1417	0.1718	0.015	0.2217	0.2303	0.0414
YDR250C	YDR250C	0.1819	0.0876	0.1347	0.0667	0.2327	0.0426
YDR251W	PAM1	0.5788	0.3568	0.4678	0.157	0.2395	0.0421
YDR252W	BTT1	0.0977	0.2364	0.167	0.0981	0.2334	0.0424
YDR253C	MET32	-0.0233	-0.0325	-0.0279	0.0065	0.2283	0.0442
YDR254W	CHL4	0.2783	0.7044	0.4913	0.3013	0.2385	0.0408
YDR255C	RMD5	0.2778	0.1375	0.2077	0.0992	0.2346	0.0431
YDR256C	CTA1	0.2198	0.5806	0.4002	0.2551	0.2355	0.0393
YDR257C	RMS1	0.2301	0.7359	0.483	0.3577	0.2391	0.0423
YDR258C	HSP78	0.1947	0.2777	0.2362	0.0587	0.2348	0.0427
YDR259C	YAP6	0.0674	0.0528	0.0601	0.0103	0.2309	0.0418
YDR260C	SWM1	-0.0074	-0.2095	-0.1084	0.1429	0.2305	0.0429
YDR261C	EXG2	0.3301	0.2449	0.2875	0.0602	0.2346	0.0408
YDR262W	YDR262W	0.1931	0.1289	0.161	0.0454	0.2336	0.0425
YDR263C	DIN7	0.0464	-0.2744	-0.114	0.2268	0.2263	0.042
YDR265W	PEX10	0.6644	0.4072	0.5358	0.1818	0.2407	0.0406
YDR266C	YDR266C	0.2418	-0.1418	0.05	0.2712	0.2328	0.0443
YDR269C	YDR269C	-0.1269	0.0143	-0.0563	0.0998	0.229	0.0415
YDR270W	CCC2	0.1815	-0.05	0.0657	0.1637	0.2314	0.042
YDR271C	YDR271C	0.3114	-0.2092	0.0511	0.3681	0.2312	0.0424
YDR272W	GLO2	0.7237	0.2872	0.5055	0.3086	0.2381	0.0391
YDR273W	DON1	0.1421	-0.0451	0.0485	0.1324	0.2397	0.0367
YDR274C	YDR274C	0.2524	0.0303	0.1414	0.157	0.2328	0.0419
YDR275W	BSC2	0.1105	-0.0179	0.0463	0.0907	0.2304	0.0434
YDR277C	MTH1	0.2879	0.5934	0.4406	0.216	0.2389	0.0438
YDR278C	YDR278C	-0.0898	0.1464	0.0283	0.167	0.2314	0.0446
YDR279W	RNH202	0.1516	0.0081	0.0798	0.1014	0.2322	0.0435
YDR281C	PHM6	-0.1863	-0.0307	-0.1085	0.11	0.2248	0.0414
YDR282C	YDR282C	0.3177	0.0233	0.1705	0.2081	0.2325	0.04
YDR284C	DPP1	0.3002	0.4085	0.3544	0.0766	0.2376	0.0437
YDR285W	ZIP1	-0.1929	-0.0309	-0.1119	0.1146	0.2297	0.0423
YDR286C	YDR286C	0.0927	0.6103	0.3515	0.366	0.2356	0.0372
YDR287W	YDR287W	-0.0075	-0.0158	-0.0116	0.0059	0.2303	0.0429
YDR289C	RTT103	0.6933	0.3922	0.5427	0.2129	0.2394	0.0384
YDR290W	SWS1	-0.6328	-0.2177	-0.4252	0.2935	0.2248	0.0442
YDR291W	YDR291W	0.1966	0.0218	0.1092	0.1236	0.2318	0.0414
YDR293C	SSD1	-0.3847	-0.0498	-0.2172	0.2367	0.2254	0.0507
YDR294C	DPL1	0.0102	-0.0095	0.0003	0.0139	0.2302	0.0425
YDR297W	SUR2	1.1507	0.969	1.0599	0.1285	0.2493	0.0405
YDR304C	CPR5	0.0708	0.252	0.1614	0.1282	0.2324	0.0396
YDR305C	HNT2	0.7076	-0.0206	0.3435	0.5149	0.2365	0.0414
YDR306C	YDR306C	0.0002	-0.1113	-0.0556	0.0789	0.2277	0.0409
YDR307W	YDR307W	0.0114	-0.1169	-0.0528	0.0907	0.2296	0.0438
YDR309C	GIC2	0.0632	-0.0888	-0.0128	0.1075	0.2321	0.0429
YDR310C	SUM1	0.8827	1.0584	0.9706	0.1242	0.2469	0.039
YDR312W	SSF2	0.1183	0.4402	0.2793	0.2276	0.2354	0.042
YDR313C	PIB1	-0.5017	-0.2418	-0.3717	0.1837	0.226	0.0443
YDR314C	YDR314C	0.0071	0.0218	0.0144	0.0104	0.2306	0.0409
YDR315C	IPK1	-0.051	-0.1918	-0.1214	0.0996	0.2341	0.0421
YDR316W	YDR316W	0.2119	0.0994	0.1557	0.0795	0.2333	0.0432
YDR317W	YDR317W	-0.2507	-0.1098	-0.1803	0.0997	0.2292	0.0433
YDR318W	MCM21	-0.113	0.2013	0.0442	0.2223	0.2309	0.0407
YDR319C	YDR319C	0.3583	-0.1878	0.0853	0.3862	0.2321	0.0434
YDR320C	SWA2	-0.1032	0.4354	0.1661	0.3809	0.2295	0.0546
YDR321W	ASP1	0.0498	0.5223	0.2861	0.3341	0.2351	0.0403
YDR322W	MRPL35	-0.9985	-1.6373	-1.3179	0.4517	0.1928	0.0554
YDR323C	PEP7	-1.3111	-0.9228	-1.117	0.2746	0.1946	0.0573
YDR326C	YDR326C	-0.2229	-0.1181	-0.1705	0.0741	0.2272	0.0428
YDR329C	PEX3	-0.4302	-0.198	-0.3141	0.1642	0.2245	0.0407
YDR330W	YDR330W	-0.6497	0.0217	-0.314	0.4748	0.225	0.0433
YDR333C	YDR333C	0.1997	0.3198	0.2598	0.0849	0.2365	0.0435
YDR334W	YDR334W	0.3265	0.5046	0.4155	0.126	0.2426	0.0468
YDR335W	MSN5	0.0652	-0.2114	-0.0731	0.1956	0.2318	0.0474
YDR336W	YDR336W	0.0031	0.2133	0.1082	0.1486	0.2361	0.041
YDR338C	YDR338C	0.2534	0.4117	0.3325	0.1119	0.2345	0.0366
YDR340W	YDR340W	0.0764	0.0736	0.075	0.002	0.2316	0.0413
YDR344C	YDR344C	-0.1445	-0.2719	-0.2082	0.0901	0.2281	0.0409
YDR346C	SVF1	-0.2321	-0.27	-0.251	0.0268	0.2281	0.0441
YDR347W	MRP1	0.6681	-0.8331	-0.0825	1.0615	0.2308	0.0466
YDR348C	YDR348C	-0.2275	-0.4429	-0.3352	0.1523	0.2247	0.0434
YDR349C	YPS7	-1.0792	-1.3922	-1.2357	0.2213	0.2076	0.0441
YDR350C	TCM10	-1.0607	-1.2469	-1.1538	0.1317	0.2051	0.0434
YDR351W	SBE2	0.2605	0.6941	0.4773	0.3066	0.2395	0.041
YDR352W	YDR352W	-0.6256	-0.1846	-0.4051	0.3118	0.2232	0.0431
YDR354W	TRP4	-0.3045	-0.1099	-0.2072	0.1375	0.2262	0.0427
YDR357C	YDR357C	0.0234	-0.2836	-0.1301	0.2171	0.2288	0.0412
YDR358W	GGA1	0.1892	0.023	0.1061	0.1176	0.2324	0.0431
YDR359C	VID21	-0.0074	-0.2095	-0.1084	0.1429	0.2305	0.0429
YDR360W	YDR360W	-0.0225	-0.0381	-0.0303	0.011	0.23	0.0413
YDR363W	ESC2	0.5747	0.0349	0.3048	0.3817	0.2381	0.0446
YDR363W-A	SEM1	0.0174	-0.2619	-0.1222	0.1975	0.2292	0.0443
YDR364C	CDC40	-0.1024	-0.4064	-0.2544	0.215	0.2256	0.0517
YDR368W	YPR1	0.0748	0.2471	0.161	0.1218	0.2317	0.0392
YDR369C	XRS2	0.2333	0.4271	0.3302	0.137	0.2369	0.0402
YDR370C	YDR370C	0.0121	0.0465	0.0293	0.0243	0.2308	0.0429
YDR371W	CTS2	0.0242	0.1644	0.0943	0.0991	0.2319	0.0422
YDR372C	VPS74	0.389	-0.0241	0.1825	0.2921	0.2338	0.0429
YDR374C	YDR374C	0.0567	-0.1141	-0.0287	0.1207	0.2299	0.0425
YDR375C	BCS1	-0.3199	-0.4592	-0.3895	0.0985	0.2227	0.0475
YDR377W	ATP17	-0.2215	-0.4178	-0.3196	0.1389	0.2227	0.0424
YDR378C	LSM6	-0.16	-0.5945	-0.3773	0.3072	0.218	0.0466
YDR379W	RGA2	0.2205	0.1374	0.1789	0.0588	0.2333	0.0417
YDR380W	ARO10	0.1715	0.0146	0.0931	0.111	0.2323	0.0431
YDR382W	RPP2B	-0.7842	-0.7832	-0.7837	0.0007	0.2166	0.0427
YDR383C	NKP1	0.0717	-0.145	-0.0367	0.1532	0.2289	0.0422
YDR384C	ATO3	-0.1258	0.1966	0.0354	0.228	0.2312	0.041
YDR385W	EFT2	0.4208	0.227	0.3239	0.137	0.2353	0.0397
YDR386W	MUS81	0.0391	-0.1983	-0.0796	0.1679	0.229	0.0419
YDR387C	YDR387C	0.6898	0.1343	0.4121	0.3928	0.2373	0.0415
YDR388W	RVS167	-0.9139	-1.1995	-1.0567	0.2019	0.2103	0.0449
YDR389W	SAC7	-1.3956	-1.4168	-1.4062	0.015	0.2031	0.048
YDR391C	YDR391C	0.1219	0.1593	0.1406	0.0264	0.2321	0.0395
YDR392W	SPT3	-1.0041	-0.6966	-0.8503	0.2174	0.2136	0.0435
YDR393W	SHE9	-0.6948	-0.8304	-0.7626	0.0959	0.2165	0.046
YDR395W	SXM1	0.2945	0.1923	0.2434	0.0723	0.2354	0.0446
YDR399W	HPT1	0.2926	0.6653	0.4789	0.2636	0.2371	0.0384
YDR400W	URH1	-0.0583	-0.4237	-0.241	0.2583	0.226	0.0433
YDR401W	YDR401W	0.2406	0.05	0.1453	0.1348	0.2323	0.0362
YDR402C	DIT2	-0.1352	-0.0106	-0.0729	0.0881	0.2288	0.0406
YDR403W	DIT1	0.2369	0.0495	0.1432	0.1326	0.2329	0.0424
YDR405W	MRP20	-0.8927	-1.2262	-1.0594	0.2358	0.2052	0.0478
YDR406W	PDR15	-0.2743	-0.2169	-0.2456	0.0406	0.2282	0.0441
YDR408C	ADE8	0.0274	0.1574	0.0924	0.0919	0.2351	0.043
YDR409W	SIZ1	0.9227	0.6914	0.8071	0.1636	0.2438	0.0373
YDR410C	STE14	-0.3674	0.0247	-0.1714	0.2773	0.2271	0.0426
YDR411C	YDR411C	0.3859	0.1233	0.2546	0.1856	0.2339	0.0414
YDR414C	ERD1	-0.0591	0.5882	0.2646	0.4577	0.2353	0.0427
YDR415C	YDR415C	-0.2937	-0.4811	-0.3874	0.1325	0.2238	0.0442
YDR417C	YDR417C	-2.1995	-1.6932	-1.9463	0.358	0.1909	0.0429
YDR418W	RPL12B	-1.1094	-1.1909	-1.1501	0.0576	0.2091	0.0466
YDR419W	RAD30	0.0486	0.1771	0.1128	0.0909	0.2326	0.0423
YDR420W	HKR1	0.0594	-0.023	0.0182	0.0583	0.2309	0.0425
YDR421W	ARO80	-0.042	-0.1913	-0.1167	0.1056	0.219	0.043
YDR422C	SIP1	-0.0331	0.1106	0.0387	0.1016	0.2318	0.0442
YDR423C	CAD1	-0.2573	0.116	-0.0707	0.2639	0.229	0.0429
YDR424C	DYN2	0.0631	0.1478	0.1054	0.0599	0.2318	0.0412
YDR425W	SNX41	-0.0434	0.0052	-0.0191	0.0344	0.23	0.0429
YDR426C	YDR426C	0.4486	0.338	0.3933	0.0782	0.2379	0.0424
YDR428C	YDR428C	0.0464	-0.2549	-0.1042	0.213	0.2305	0.0429
YDR430C	CYM1	0.4463	0.4813	0.4638	0.0248	0.2384	0.0409
YDR431W	YDR431W	0.4932	0.334	0.4136	0.1126	0.2395	0.0444
YDR435C	PPM1	0.2218	0.4263	0.324	0.1446	0.2378	0.0432
YDR436W	PPZ2	0.2197	0.0832	0.1514	0.0965	0.2347	0.0407
YDR438W	YDR438W	-0.406	0.0354	-0.1853	0.3121	0.2266	0.0392
YDR439W	LRS4	0.4759	0.3825	0.4292	0.066	0.2401	0.0408
YDR440W	DOT1	-0.4564	-0.8835	-0.6699	0.302	0.2112	0.0429
YDR441C	APT2	0.7619	0.1754	0.4686	0.4147	0.2386	0.0392
YDR442W	YDR442W	-0.2886	0.0505	-0.1191	0.2398	0.2298	0.0417
YDR443C	SSN2	-0.0271	0.265	0.1189	0.2065	0.2327	0.0434
YDR444W	YDR444W	-0.0536	0.2309	0.0887	0.2012	0.2317	0.0413
YDR445C	YDR445C	-0.0611	-0.1502	-0.1057	0.063	0.2305	0.0429
YDR446W	ECM11	-0.02	-0.2252	-0.1226	0.1451	0.2305	0.0429
YDR447C	RPS17B	-0.0689	0.1545	0.0428	0.1579	0.2313	0.0419
YDR448W	ADA2	0.2246	0.0011	0.1129	0.1581	0.2363	0.0431
YDR450W	RPS18A	0.1326	-0.1671	-0.0172	0.212	0.23	0.0414
YDR451C	YHP1	-0.1491	0.0946	-0.0273	0.1723	0.2297	0.0411
YDR452W	PPN1	0.2783	0.8125	0.5454	0.3777	0.2402	0.0357
YDR453C	TSA2	-0.0074	-0.2619	-0.1346	0.18	0.2305	0.0429
YDR455C	YDR455C	-0.3473	-0.3164	-0.3318	0.0218	0.2243	0.0439
YDR456W	NHX1	-0.0302	0.0539	0.0119	0.0594	0.2363	0.0412
YDR457W	TOM1	-0.3944	-0.1201	-0.2573	0.194	0.2254	0.0414
YDR458C	YDR458C	-0.0886	-0.1391	-0.1139	0.0357	0.2306	0.0435
YDR459C	YDR459C	0.2985	0.4318	0.3651	0.0943	0.2364	0.04
YDR461W	MFA1	-0.1017	-0.4165	-0.2591	0.2226	0.2277	0.0436
YDR462W	MRPL28	0.4071	0.638	0.5225	0.1632	0.2417	0.0423
YDR463W	STP1	-0.0643	-0.0217	-0.043	0.0301	0.2306	0.0412
YDR465C	RMT2	0.9772	0.7515	0.8643	0.1595	0.2495	0.0378
YDR466W	YDR466W	-0.0173	-0.0496	-0.0334	0.0229	0.2287	0.0399
YDR467C	YDR467C	-0.0022	0.1535	0.0756	0.11	0.2319	0.0432
YDR469W	SDC1	0.1206	0.355	0.2378	0.1658	0.2362	0.043
YDR470C	UGO1	0.0076	-0.1739	-0.0832	0.1284	0.2292	0.042
YDR471W	RPL27B	-0.2906	-0.4276	-0.3591	0.0969	0.2244	0.0444
YDR474C	YDR474C	-0.0698	-0.2422	-0.156	0.1219	0.228	0.0443
YDR475C	JIP4	-0.1142	0.4946	0.1902	0.4304	0.2335	0.0404
YDR476C	YDR476C	1.1806	0.4399	0.8103	0.5237	0.2474	0.0378
YDR477W	SNF1	-0.8338	-0.7544	-0.7941	0.0562	0.2093	0.0538
YDR479C	PEX29	0.0361	-0.4726	-0.2183	0.3597	0.216	0.0448
YDR480W	DIG2	0.0435	0.0224	0.033	0.0149	0.2316	0.0442
YDR481C	PHO8	-0.3639	-0.1982	-0.281	0.1172	0.2274	0.044
YDR482C	CWC21	0.123	0.1696	0.1463	0.033	0.232	0.0383
YDR483W	KRE2	0.5037	0.3946	0.4492	0.0771	0.2387	0.0433
YDR484W	VPS52	-0.8015	-0.8725	-0.837	0.0502	0.2161	0.0451
YDR485C	VPS72	0.0995	0.0531	0.0763	0.0328	0.2368	0.0478
YDR486C	VPS60	-0.0281	-0.1787	-0.1034	0.1065	0.2309	0.0441
YDR488C	PAC11	-0.2788	0.5582	0.1397	0.5919	0.2337	0.0445
YDR490C	PKH1	0.5616	0.4811	0.5214	0.0569	0.2402	0.0381
YDR491C	YDR491C	0.2113	-0.1148	0.0482	0.2306	0.2332	0.0421
YDR492W	YDR492W	0.1891	-0.0361	0.0765	0.1592	0.231	0.0413
YDR493W	FMP36	1.1657	0.3097	0.7377	0.6053	0.2464	0.0436
YDR494W	RSM28	0.3829	0.0099	0.1964	0.2637	0.234	0.0422
YDR495C	VPS3	-0.4168	-0.069	-0.2429	0.2459	0.2281	0.0471
YDR496C	PUF6	0.279	-0.0742	0.1024	0.2497	0.2319	0.0414
YDR497C	ITR1	-0.187	0.3536	0.0833	0.3823	0.232	0.0425
YDR500C	RPL37B	-0.4181	-0.5707	-0.4944	0.1079	0.2222	0.0503
YDR501W	PLM2	-0.2219	0.2003	-0.0108	0.2985	0.2296	0.0402
YDR502C	SAM2	-0.0993	0.0572	-0.0211	0.1107	0.23	0.0428
YDR503C	LPP1	0.13	0.1021	0.1161	0.0198	0.2313	0.0408
YDR504C	YDR504C	0.1884	0.0734	0.1309	0.0813	0.2331	0.0426
YDR505C	PSP1	0.2173	-0.0021	0.1076	0.1551	0.2383	0.0383
YDR506C	YDR506C	-0.1339	-0.0369	-0.0854	0.0686	0.2293	0.0443
YDR506C	YDR506C	-0.2687	-0.373	-0.3208	0.0737	0.2251	0.0415
YDR507C	GIN4	-0.6749	-1.0806	-0.8778	0.2868	0.2118	0.0439
YDR508C	GNP1	-0.3585	-0.2916	-0.3251	0.0473	0.2265	0.0418
YDR509W	YDR509W	-0.2907	-0.2617	-0.2762	0.0206	0.2274	0.0426
YDR511W	ACN9	-0.1209	-0.1899	-0.1554	0.0487	0.2272	0.0427
YDR512C	EMI1	0.297	-0.562	-0.1325	0.6074	0.2281	0.0426
YDR513W	TTR1	0.0139	0.4363	0.2251	0.2987	0.2327	0.0396
YDR514C	YDR514C	0.411	0.3372	0.3741	0.0522	0.2404	0.0451
YDR515W	SLF1	0.0632	0.0578	0.0605	0.0039	0.2317	0.0432
YDR516C	EMI2	-0.1036	0.4542	0.1753	0.3944	0.2321	0.0411
YDR517W	GRH1	-0.0246	-0.2326	-0.1286	0.147	0.2285	0.0433
YDR518W	EUG1	-0.5877	-0.8165	-0.7021	0.1618	0.2196	0.0448
YDR519W	FPR2	0.2193	0.2423	0.2308	0.0163	0.235	0.0427
YDR522C	SPS2	0.0015	0.0128	0.0071	0.008	0.231	0.0423
YDR523C	SPS1	-0.4016	-0.5608	-0.4812	0.1126	0.2239	0.0445
YDR524C	AGE1	-0.5456	-0.4063	-0.4759	0.0986	0.2216	0.0466
YDR525W	API2	-0.02	-0.2069	-0.1134	0.1322	0.2293	0.0425
YDR525W-A	SNA2	-0.3033	0.1336	-0.0849	0.309	0.2284	0.0415
YDR528W	HLR1	-0.0654	0.1554	0.045	0.1561	0.2308	0.0421
YDR529C	QCR7	-0.6225	-0.9753	-0.7989	0.2495	0.2153	0.046
YDR530C	APA2	-0.2865	0.2879	0.0007	0.4061	0.2354	0.0387
YDR532C	YDR532C	-0.1409	-0.8955	-0.5182	0.5336	0.2198	0.0455
YDR533C	YDR533C	0.5259	0.3301	0.428	0.1385	0.2415	0.0405
YDR534C	FIT1	-0.1917	0.286	0.0471	0.3378	0.2325	0.0452
YDR535C	YDR535C	0.0599	0.4757	0.2678	0.294	0.2347	0.0406
YDR536W	STL1	0.0736	0.0135	0.0436	0.0425	0.2326	0.0429
YDR537C	YDR537C	-0.0125	-0.1346	-0.0735	0.0863	0.2294	0.0437
YDR538W	PAD1	-0.0563	-0.0614	-0.0589	0.0036	0.2296	0.0427
YDR539W	YDR539W	-0.3402	0.7452	0.2025	0.7675	0.2338	0.0413
YDR540C	YDR540C	0.1162	-0.0416	0.0373	0.1115	0.2311	0.0429
YDR541C	YDR541C	-0.1381	0.5654	0.2136	0.4975	0.2346	0.0427
YEL001C	YEL001C	0.1978	-0.1078	0.045	0.2161	0.2314	0.0435
YEL003W	GIM4	0.5792	-0.0892	0.245	0.4726	0.2358	0.0441
YEL004W	YEA4	0.341	0.2397	0.2904	0.0716	0.2392	0.0478
YEL005C	VAB2	0.1941	0.0346	0.1144	0.1128	0.2338	0.0463
YEL006W	YEL006W	0.2518	0.0192	0.1355	0.1645	0.235	0.0427
YEL007W	YEL007W	0.1375	0.445	0.2912	0.2175	0.2367	0.0424
YEL008W	YEL008W	0.2408	0.0624	0.1516	0.1262	0.2326	0.0413
YEL009C	GCN4	0.0902	0.5883	0.3393	0.3522	0.2354	0.0372
YEL010W	YEL010W	0.6149	0.2486	0.4318	0.259	0.239	0.0395
YEL011W	GLC3	-0.0052	0.1492	0.072	0.1092	0.2319	0.0439
YEL012W	UBC8	0.1956	-0.1884	0.0036	0.2715	0.2312	0.0372
YEL013W	VAC8	-1.4702	-1.4234	-1.4468	0.0331	0.2021	0.0473
YEL014C	YEL014C	-0.1896	-0.7021	-0.4459	0.3624	0.2228	0.0417
YEL015W	EDC3	0.4941	0.0992	0.2967	0.2792	0.2351	0.0406
YEL016C	YEL016C	0.231	-0.1767	0.0272	0.2883	0.2307	0.0414
YEL017C-A	PMP2	0.1983	-0.1744	0.012	0.2635	0.2307	0.0416
YEL017W	GTT3	-0.1155	-0.113	-0.1142	0.0018	0.2331	0.042
YEL020C	YEL020C	0.0912	-0.3245	-0.1167	0.2939	0.2282	0.0428
YEL023C	YEL023C	0.0289	-0.1728	-0.072	0.1426	0.231	0.0427
YEL024W	RIP1	-0.3933	-0.4927	-0.443	0.0703	0.2239	0.045
YEL025C	YEL025C	-0.114	0.4398	0.1629	0.3917	0.2343	0.0433
YEL028W	YEL028W	0.4033	-0.0108	0.1962	0.2928	0.2345	0.0351
YEL029C	BUD16	-0.0074	-0.2095	-0.1084	0.1429	0.2305	0.0429
YEL030W	ECM10	0.2902	-0.1334	0.0784	0.2996	0.2317	0.0425
YEL033W	YEL033W	0.155	0.9954	0.5752	0.5942	0.2415	0.0406
YEL037C	RAD23	0.5146	0.0536	0.2841	0.3259	0.236	0.0423
YEL038W	UTR4	-0.1123	-0.0313	-0.0718	0.0573	0.2313	0.0436
YEL039C	CYC7	-0.6596	0.2988	-0.1804	0.6776	0.2266	0.0393
YEL040W	UTR2	-0.0074	-0.2095	-0.1084	0.1429	0.2305	0.0429
YEL041W	YEL041W	0.0576	0.1522	0.1049	0.0669	0.2323	0.0425
YEL042W	GDA1	-0.6889	0.1649	-0.262	0.6037	0.232	0.0416
YEL043W	YEL043W	-0.0185	0.1244	0.0529	0.1011	0.2311	0.0379
YEL045C	YEL045C	-0.0292	-0.4552	-0.2422	0.3012	0.2154	0.0535
YEL046C	GLY1	-0.0793	0.0183	-0.0305	0.069	0.2285	0.0497
YEL047C	YEL047C	0.1992	-0.0333	0.083	0.1645	0.2318	0.0419
YEL048C	YEL048C	-0.3326	0.2	-0.0663	0.3766	0.2294	0.0427
YEL049W	PAU2	-0.0485	-0.0491	-0.0488	0.0004	0.2305	0.0411
YEL052W	AFG1	-0.179	0.2719	0.0465	0.3188	0.2312	0.0403
YEL053C	MAK10	-0.7113	-0.2771	-0.4942	0.3071	0.2206	0.0475
YEL054C	RPL12A	-0.3248	-0.7522	-0.5385	0.3022	0.2212	0.0466
YEL056W	HAT2	0.2704	0.1706	0.2205	0.0706	0.233	0.0414
YEL057C	YEL057C	0.0384	0.0559	0.0472	0.0124	0.231	0.041
YEL059W	YEL059W	-0.2683	-0.5153	-0.3918	0.1746	0.2234	0.0457
YEL060C	PRB1	0.1896	-0.0221	0.0837	0.1497	0.2312	0.0433
YEL061C	CIN8	-1.4164	-0.2806	-0.8485	0.8031	0.2156	0.0432
YEL062W	NPR2	-1.2959	-1.6001	-1.448	0.2151	0.2043	0.0451
YEL063C	CAN1	0.3921	0.1972	0.2947	0.1378	0.2354	0.0422
YEL064C	AVT2	-0.0696	-0.086	-0.0778	0.0116	0.2309	0.0429
YEL065W	SIT1	-0.1139	0.0539	-0.03	0.1186	0.2297	0.0423
YEL066W	HPA3	-0.0271	-0.1755	-0.1013	0.1049	0.2302	0.0429
YEL067C	YEL067C	-0.1134	0.038	-0.0377	0.1071	0.2294	0.0417
YEL068C	YEL068C	0.1193	0.0431	0.0812	0.0539	0.2237	0.043
YEL071W	DLD3	0.246	0.1864	0.2162	0.0421	0.2336	0.0412
YEL072W	RMD6	0.3501	0.453	0.4016	0.0728	0.2389	0.0445
YER001W	MNN1	0.1357	0.0052	0.0705	0.0923	0.2317	0.0436
YER002W	NOP16	-0.0723	-0.4419	-0.2571	0.2614	0.2313	0.0428
YER005W	YND1	0.0729	0.458	0.2654	0.2723	0.2348	0.0426
YER007C-A	YER007C-A	-0.9235	-0.2585	-0.591	0.4702	0.2202	0.0428
YER007W	PAC2	-0.0323	-0.0563	-0.0443	0.017	0.2299	0.0435
YER007W	PAC2	-0.0074	-0.2095	-0.1084	0.1429	0.2305	0.0429
YER010C	YER010C	0.1292	-0.1319	-0.0014	0.1846	0.2303	0.043
YER011W	TIR1	0.1543	-0.0392	0.0575	0.1368	0.2329	0.0417
YER016W	BIM1	-0.2461	0.1929	-0.0266	0.3104	0.2318	0.0427
YER017C	AFG3	-0.0014	-1.2185	-0.61	0.8606	0.2142	0.0455
YER019C-A	SBH2	-0.2231	-0.1958	-0.2094	0.0194	0.229	0.0446
YER019W	ISC1	-0.9211	-1.6416	-1.2814	0.5095	0.1922	0.0504
YER020W	GPA2	-0.6844	-0.3617	-0.5231	0.2282	0.2207	0.0423
YER024W	YAT2	-0.3105	0.1663	-0.0721	0.3371	0.2292	0.0432
YER027C	GAL83	0.9566	0.509	0.7328	0.3165	0.2449	0.044
YER028C	MIG3	0.0979	0.1554	0.1267	0.0407	0.232	0.0413
YER030W	YER030W	0.0141	0.0006	0.0074	0.0095	0.2323	0.0422
YER032W	FIR1	0.4271	0.2724	0.3498	0.1094	0.2369	0.0423
YER033C	ZRG8	0.2391	-0.4773	-0.1191	0.5066	0.2285	0.0434
YER034W	YER034W	0.2408	0.3785	0.3096	0.0974	0.2368	0.0443
YER035W	EDC2	-0.2866	0.218	-0.0343	0.3568	0.2293	0.039
YER037W	PHM8	0.0366	0.0002	0.0184	0.0257	0.2315	0.045
YER038W-A	FMP49	-0.1319	-0.103	-0.1174	0.0204	0.228	0.0407
YER039C	HVG1	-0.2052	0.008	-0.0986	0.1508	0.2284	0.0413
YER039C-A	YER039C-A	0.3837	0.185	0.2844	0.1405	0.2351	0.0415
YER040W	GLN3	-0.2556	-0.3476	-0.3016	0.065	0.2268	0.0428
YER041W	YEN1	0.1509	-0.0198	0.0655	0.1207	0.2311	0.041
YER042W	MXR1	-0.2328	-0.1265	-0.1797	0.0752	0.2269	0.0415
YER044C-A	MEI4	0.189	-0.084	0.0525	0.1931	0.2315	0.0426
YER045C	ACA1	-0.3332	-0.0547	-0.194	0.1969	0.2272	0.0445
YER046W	SPO73	-0.0378	-0.1939	-0.1159	0.1104	0.2302	0.0423
YER046W-A	YER046W-A	0.4575	-0.0551	0.2012	0.3625	0.2354	0.0433
YER047C	SAP1	0.2361	0.2446	0.2404	0.006	0.2417	0.0304
YER048C	CAJ1	0.2314	0.0123	0.1218	0.1549	0.2328	0.0428
YER050C	RSM18	-0.5269	-0.5815	-0.5542	0.0386	0.2206	0.0447
YER051W	YER051W	0.1564	-0.1201	0.0182	0.1956	0.2307	0.0426
YER052C	HOM3	-0.0074	-0.2095	-0.1084	0.1429	0.2305	0.0429
YER053C	YER053C	-0.3175	-0.0742	-0.1958	0.172	0.2263	0.0418
YER054C	GIP2	-0.0452	-0.0407	-0.043	0.0031	0.2295	0.0398
YER055C	HIS1	0.1207	-0.1045	0.0081	0.1592	0.2302	0.0419
YER056C	FCY2	-0.7204	-0.9954	-0.8579	0.1945	0.2154	0.0426
YER056C-A	RPL34A	-0.4	-0.066	-0.233	0.2362	0.226	0.0431
YER057C	HMF1	0.1231	0.199	0.161	0.0537	0.2333	0.0431
YER058W	PET117	-0.1607	-1.101	-0.6308	0.6649	0.2197	0.0422
YER059W	PCL6	0.4736	0.1036	0.2886	0.2616	0.2354	0.0423
YER060W	FCY21	0.329	-0.0658	0.1316	0.2792	0.2332	0.0431
YER060W-A	FCY22	-0.1155	0.4075	0.146	0.3698	0.2324	0.0407
YER061C	CEM1	-0.2466	-0.2505	-0.2485	0.0027	0.2264	0.0449
YER062C	HOR2	1.3199	1.1791	1.2495	0.0996	0.2577	0.0364
YER063W	THO1	-0.3818	-0.1233	-0.2525	0.1828	0.2276	0.0407
YER064C	YER064C	-0.0702	-0.3707	-0.2205	0.2125	0.2264	0.0404
YER065C	ICL1	-0.2993	-0.1808	-0.2401	0.0838	0.2261	0.0428
YER066C-A	YER066C-A	0.7795	0.1718	0.4756	0.4297	0.2418	0.0386
YER066W	YER066W	0.4418	0.6286	0.5352	0.1321	0.2474	0.0293
YER067C-A	YER067C-A	-0.1058	-0.0835	-0.0946	0.0158	0.2289	0.0439
YER067W	YER067W	0.3114	-0.0359	0.1378	0.2456	0.2324	0.0419
YER068C-A	YER068C-A	-0.0725	0.1272	0.0273	0.1413	0.2305	0.041
YER068W	MOT2	-1.0486	-1.8759	-1.4622	0.585	0.1884	0.0473
YER069W	ARG5,6	-0.0905	0.0591	-0.0157	0.1058	0.23	0.0424
YER071C	YER071C	0.2599	0.6407	0.4503	0.2693	0.2362	0.0388
YER072W	VTC1	-0.3304	-0.6254	-0.4779	0.2086	0.222	0.0438
YER073W	ALD5	0.1047	0.0701	0.0874	0.0244	0.2317	0.0427
YER074W	RPS24A	-1.0354	-0.8731	-0.9543	0.1148	0.2129	0.0434
YER075C	PTP3	0.4494	-0.0286	0.2104	0.338	0.2349	0.0437
YER078C	YER078C	0.2615	0.0028	0.1322	0.1829	0.2326	0.043
YER079W	YER079W	0.1331	0.0426	0.0878	0.064	0.2319	0.0431
YER080W	FMP29	-0.2771	-0.2638	-0.2704	0.0094	0.2275	0.0424
YER081W	SER3	0.0585	-0.1062	-0.0238	0.1164	0.2297	0.0416
YER083C	RMD7	-0.2686	-1.0069	-0.6377	0.5221	0.2134	0.057
YER084W	YER084W	-0.0292	0.2259	0.0984	0.1804	0.2347	0.0444
YER085C	YER085C	-0.2501	0.1065	-0.0718	0.2522	0.2291	0.0422
YER086W	ILV1	0.0811	-0.1825	-0.0507	0.1864	0.2296	0.0431
YER087C-A	YER087C-A	0.2195	0.36	0.2898	0.0993	0.2353	0.0415
YER088C	DOT6	0.7556	0.934	0.8448	0.1261	0.2444	0.0364
YER089C	PTC2	-0.1818	-0.0712	-0.1265	0.0782	0.2279	0.0463
YER090W	TRP2	-0.6234	-0.3617	-0.4926	0.185	0.2214	0.0421
YER091C	MET6	-0.0074	-0.1974	-0.1024	0.1344	0.2305	0.0429
YER091C-A	YER091C-A	0.2333	-0.0376	0.0978	0.1916	0.2317	0.0416
YER092W	IES5	-1.1923	-0.6764	-0.9344	0.3648	0.2128	0.0436
YER093C-A	YER093C-A	-0.1407	0.0093	-0.0657	0.1061	0.2292	0.0424
YER095W	RAD51	-0.1193	0.2005	0.0406	0.2261	0.2331	0.0426
YER096W	SHC1	0.0609	-0.1556	-0.0474	0.1531	0.2295	0.0433
YER097W	YER097W	0.1054	-0.1352	-0.0149	0.1701	0.2317	0.0422
YER098W	UBP9	0.2746	0.1814	0.228	0.0658	0.2339	0.0415
YER101C	AST2	0.0818	-0.0635	0.0091	0.1028	0.2309	0.0427
YER103W	SSA4	-0.231	-1.0667	-0.6488	0.5909	0.2182	0.047
YER106W	MAM1	-0.053	-0.0248	-0.0389	0.02	0.2317	0.043
YER108C	YER108C	0.0347	0.3103	0.1725	0.1949	0.2326	0.0405
YER109C	FLO8	0.1242	-0.1261	-0.001	0.177	0.2305	0.0432
YER110C	KAP123	0.2917	-0.0112	0.1402	0.2142	0.2331	0.0461
YER111C	SWI4	-0.5434	-0.3263	-0.4349	0.1535	0.2246	0.0459
YER113C	YER113C	0.2615	-0.3193	-0.0289	0.4107	0.23	0.0431
YER114C	BOI2	-0.2888	-0.3844	-0.3366	0.0676	0.2245	0.0449
YER115C	SPR6	-0.0487	0.2035	0.0774	0.1783	0.2319	0.0431
YER116C	SLX8	-0.6048	0.1449	-0.2299	0.5302	0.2264	0.0434
YER118C	SHO1	0.1462	-0.2308	-0.0423	0.2665	0.2295	0.0426
YER119C	AVT6	-0.4171	-0.2872	-0.3521	0.0918	0.2243	0.0438
YER120W	SCS2	0.4835	0.117	0.3003	0.2592	0.2373	0.046
YER121W	YER121W	-0.0551	-0.1935	-0.1243	0.0978	0.2281	0.0422
YER123W	YCK3	0.2338	0.1579	0.1958	0.0537	0.2344	0.0383
YER124C	DSE1	-0.0074	-0.1943	-0.1009	0.1322	0.2309	0.0419
YER128W	YER128W	0.0326	-0.1895	-0.0784	0.1571	0.229	0.0432
YER129W	PAK1	0.3506	0.1016	0.2261	0.176	0.236	0.0481
YER130C	YER130C	1.0037	0.78	0.8918	0.1582	0.2477	0.0367
YER131W	RPS26B	-0.6308	-0.2843	-0.4576	0.245	0.222	0.0437
YER132C	PMD1	0.1037	-0.4279	-0.1621	0.3759	0.2269	0.0425
YER134C	YER134C	-0.2485	0.2178	-0.0153	0.3297	0.2298	0.0415
YER135C	YER135C	-0.3444	-0.2598	-0.3021	0.0598	0.227	0.0441
YER137C	YER137C	0.2051	0.0241	0.1146	0.128	0.2321	0.0414
YER139C	YER139C	0.3369	0.5564	0.4466	0.1552	0.2406	0.0465
YER140W	YER140W	-0.0898	-0.0729	-0.0814	0.0119	0.2289	0.0426
YER141W	COX15	-0.6552	-0.5533	-0.6043	0.0721	0.2187	0.0447
YER142C	MAG1	-0.0377	0.1061	0.0342	0.1017	0.2303	0.0411
YER143W	DDI1	0.1673	-0.1396	0.0139	0.217	0.2294	0.0412
YER144C	UBP5	0.0808	-0.2056	-0.0624	0.2025	0.2314	0.0435
YER145C	FTR1	-0.0461	-0.0347	-0.0404	0.0081	0.2297	0.0433
YER149C	PEA2	-0.8596	-0.733	-0.7963	0.0895	0.2163	0.0445
YER150W	SPI1	0.0137	0.1145	0.0641	0.0713	0.2314	0.0428
YER151C	UBP3	-0.4249	-0.9621	-0.6935	0.3798	0.2179	0.0466
YER152C	YER152C	0.1594	0.0978	0.1286	0.0435	0.2316	0.0414
YER153C	PET122	-0.5245	-0.7673	-0.6459	0.1717	0.2192	0.0444
YER154W	OXA1	-0.3594	-0.9182	-0.6388	0.3951	0.2194	0.0431
YER155C	BEM2	-0.3585	0.2902	-0.0341	0.4587	0.2303	0.0584
YER156C	YER156C	-0.3764	0.1072	-0.1346	0.3419	0.2277	0.042
YER158C	YER158C	0.1259	0.1245	0.1252	0.001	0.2319	0.0413
YER161C	SPT2	0.1874	0.0547	0.1211	0.0938	0.235	0.0419
YER162C	RAD4	-0.2903	-0.3337	-0.312	0.0307	0.225	0.0433
YER163C	YER163C	-0.0534	-0.1687	-0.1111	0.0816	0.2295	0.0434
YER164W	CHD1	-0.0316	0.2024	0.0854	0.1655	0.2338	0.0423
YER166W	DNF1	0.0857	-0.0977	-0.006	0.1297	0.2318	0.042
YER167W	BCK2	-0.2407	-0.1004	-0.1706	0.0992	0.2295	0.0437
YER169W	RPH1	0.6125	-1.1461	-0.2668	1.2436	0.2267	0.0414
YER170W	ADK2	-0.2013	0.0532	-0.0741	0.18	0.2291	0.0425
YER173W	RAD24	0.0108	-0.2286	-0.1089	0.1693	0.2286	0.0429
YER174C	GRX4	0.4393	0.703	0.5711	0.1865	0.2419	0.0441
YER175C	TMT1	0.5824	1.3296	0.956	0.5284	0.2428	0.0305
YER176W	ECM32	-0.0608	0.1001	0.0196	0.1137	0.2307	0.0427
YER177W	BMH1	-0.3969	-0.8586	-0.6277	0.3264	0.2191	0.0425
YER178W	PDA1	-0.2278	-0.4025	-0.3152	0.1235	0.225	0.0426
YER179W	DMC1	-0.3115	0.0211	-0.1452	0.2351	0.2275	0.0402
YER180C	ISC10	0.1311	0.4744	0.3027	0.2428	0.2352	0.0419
YER181C	YER181C	0.1589	0.0503	0.1046	0.0769	0.2319	0.0421
YER182W	FMP10	0.2474	-0.0545	0.0965	0.2134	0.2323	0.0437
YER183C	FAU1	0.0888	0.0151	0.052	0.0521	0.2312	0.0433
YER184C	YER184C	-0.1443	-0.2313	-0.1878	0.0615	0.2271	0.0434
YER185W	YER185W	-0.1459	-0.1377	-0.1418	0.0058	0.2277	0.043
YER186C	YER186C	-0.2328	0.2021	-0.0153	0.3075	0.2301	0.0431
YER187W	YER187W	0.0302	-0.1233	-0.0465	0.1085	0.2291	0.042
YER188W	YER188W	0.5027	-0.1253	0.1887	0.4441	0.2338	0.043
YFL001W	DEG1	-0.4598	-0.3534	-0.4066	0.0752	0.2205	0.0539
YFL003C	MSH4	0.1057	0.0948	0.1002	0.0077	0.2328	0.0424
YFL004W	VTC2	-0.0395	0.2621	0.1113	0.2132	0.2335	0.0442
YFL006W	YFL006W	0.1941	0.3903	0.2922	0.1387	0.2373	0.0437
YFL007W	BLM3	0.1188	-0.2589	-0.0701	0.267	0.2299	0.0451
YFL010C	WWM1	0.0026	0.3338	0.1682	0.2342	0.2365	0.0439
YFL010W-A	AUA1	0.2059	0.0124	0.1091	0.1368	0.23	0.0377
YFL011W	HXT10	0.0468	0.1195	0.0831	0.0514	0.2326	0.0407
YFL012W	YFL012W	0.3604	0.158	0.2592	0.1431	0.2353	0.0338
YFL013C	IES1	-0.4005	-0.6604	-0.5305	0.1838	0.2215	0.0381
YFL013W-A	YFL013W-A	-0.3839	-0.4441	-0.414	0.0426	0.2256	0.0424
YFL014W	HSP12	0.1464	0.3506	0.2485	0.1443	0.2344	0.0403
YFL015C	YFL015C	0.0674	0.1176	0.0925	0.0355	0.2307	0.0402
YFL019C	YFL019C	-0.0061	-0.0947	-0.0504	0.0627	0.2329	0.0465
YFL020C	PAU5	0.1394	-0.1541	-0.0073	0.2076	0.2305	0.0432
YFL021W	GAT1	-0.1272	0.235	0.0539	0.2561	0.2311	0.0418
YFL023W	BUD27	-0.3836	-0.2252	-0.3044	0.112	0.213	0.0467
YFL025C	BST1	-1.6349	-1.1554	-1.3951	0.3391	0.2033	0.0393
YFL026W	STE2	-0.0542	-0.1576	-0.1059	0.0731	0.2307	0.0437
YFL027C	GYP8	0.3417	-0.1267	0.1075	0.3312	0.2327	0.0437
YFL028C	CAF16	0.2397	0.0662	0.1529	0.1227	0.235	0.0387
YFL030W	AGX1	0.4054	0.3774	0.3914	0.0198	0.2369	0.0399
YFL031W	HAC1	0.2389	-0.0422	0.0984	0.1988	0.2323	0.0432
YFL032W	YFL032W	0.1946	0.5779	0.3862	0.271	0.2362	0.0404
YFL033C	RIM15	0.3239	0.5545	0.4392	0.1631	0.2384	0.0413
YFL034C-A	RPL22B	0.235	-0.0504	0.0923	0.2018	0.2322	0.0429
YFL034W	YFL034W	-0.3669	-0.3448	-0.3558	0.0156	0.2242	0.0425
YFL035C-B	YFL035C-B	0.5036	0.4426	0.4731	0.0431	0.2419	0.0455
YFL036W	RPO41	0.0659	-0.5186	-0.2263	0.4133	0.2252	0.0425
YFL040W	YFL040W	-0.0506	0.2182	0.0838	0.1901	0.2317	0.0404
YFL041W	FET5	-0.0144	0.1924	0.089	0.1463	0.2323	0.0434
YFL042C	YFL042C	0.1498	-0.0056	0.0721	0.1099	0.2304	0.0415
YFL043C	YFL043C	0.0977	0.2691	0.1834	0.1213	0.2333	0.0417
YFL044C	YFL044C	0.4351	0.0922	0.2636	0.2425	0.2342	0.0416
YFL046W	FMP32	0.1532	-0.0334	0.0599	0.132	0.2297	0.0385
YFL047W	RGD2	0.2369	-0.3178	-0.0404	0.3922	0.2297	0.0422
YFL048C	EMP47	-0.0184	-0.0771	-0.0478	0.0415	0.2295	0.0418
YFL049W	YFL049W	0.2192	0.3472	0.2832	0.0905	0.2347	0.0403
YFL050C	ALR2	0.3781	-0.0674	0.1554	0.315	0.2346	0.0413
YFL051C	YFL051C	0.2032	0.1966	0.1999	0.0047	0.2343	0.0434
YFL052W	YFL052W	0.2341	-0.0496	0.0923	0.2006	0.2323	0.0437
YFL053W	DAK2	0.0371	-0.0345	0.0013	0.0506	0.2305	0.0431
YFL054C	YFL054C	-0.2349	0.2555	0.0103	0.3467	0.2308	0.0429
YFL055W	AGP3	-0.0631	0.0773	0.0071	0.0993	0.2306	0.0429
YFL056C	AAD6	0.1038	0.5179	0.3109	0.2928	0.2352	0.0406
YFL063W	YFL063W	0.0751	0.105	0.09	0.0211	0.2323	0.0403
YFR006W	YFR006W	0.2676	-0.2022	0.0327	0.3322	0.2309	0.0419
YFR007W	YFR007W	0.0246	0.041	0.0328	0.0116	0.2304	0.0403
YFR008W	FAR7	-0.1354	-0.6079	-0.3717	0.3341	0.2254	0.0425
YFR009W	GCN20	-0.0151	-0.1085	-0.0618	0.066	0.2291	0.0426
YFR010W	UBP6	0.2327	0.675	0.4539	0.3128	0.2407	0.0368
YFR011C	YFR011C	-0.0834	-0.0509	-0.0671	0.023	0.2298	0.0444
YFR012W	YFR012W	0.021	-0.0636	-0.0213	0.0598	0.23	0.043
YFR013W	IOC3	0.0816	0.4143	0.2479	0.2352	0.2368	0.0454
YFR014C	CMK1	-0.0996	0.2504	0.0754	0.2475	0.2313	0.042
YFR015C	GSY1	0.1209	-0.1247	-0.0019	0.1737	0.2307	0.0437
YFR016C	YFR016C	-0.384	-0.4127	-0.3983	0.0203	0.2227	0.04
YFR017C	YFR017C	0.1884	0.1762	0.1823	0.0086	0.2334	0.0421
YFR018C	YFR018C	0.6583	0.408	0.5331	0.177	0.2466	0.0263
YFR019W	FAB1	-0.4459	-0.9085	-0.6772	0.3271	0.2186	0.0445
YFR020W	YFR020W	0.0713	-0.2911	-0.1099	0.2563	0.2299	0.0426
YFR021W	ATG18	-0.0004	0.0464	0.023	0.0331	0.2294	0.0392
YFR022W	YFR022W	-0.1653	0.0977	-0.0338	0.186	0.2286	0.0376
YFR023W	PES4	0.1816	0.0843	0.1329	0.0688	0.2329	0.0433
YFR024C	YFR024C	0.2291	0.0469	0.138	0.1289	0.2322	0.0422
YFR024C-A	LSB3	0.128	-0.1795	-0.0257	0.2174	0.2302	0.0431
YFR026C	YFR026C	-0.0434	0.064	0.0103	0.076	0.2301	0.0411
YFR031C-A	RPL2A	-0.5631	-0.605	-0.584	0.0296	0.2199	0.0431
YFR032C	YFR032C	0.2127	0.1742	0.1935	0.0272	0.2328	0.0402
YFR032C-A	RPL29	-0.4526	-0.64	-0.5463	0.1325	0.2203	0.0421
YFR033C	QCR6	0.9002	0.7398	0.82	0.1135	0.2462	0.0403
YFR034C	PHO4	0.4259	0.2431	0.3345	0.1292	0.2363	0.0414
YFR035C	YFR035C	0.5577	0.3554	0.4565	0.143	0.2411	0.0377
YFR036W	CDC26	-0.2033	0.1238	-0.0398	0.2313	0.2298	0.0392
YFR038W	YFR038W	0.0098	-0.2606	-0.1254	0.1912	0.2282	0.0427
YFR039C	YFR039C	0.0946	0.0205	0.0575	0.0524	0.2326	0.0418
YFR040W	SAP155	0.144	0.0802	0.1121	0.0452	0.2341	0.0419
YFR041C	YFR041C	-0.071	-0.1098	-0.0904	0.0275	0.2304	0.0419
YFR043C	YFR043C	0.1268	-0.1964	-0.0348	0.2285	0.2298	0.0425
YFR044C	YFR044C	-0.0785	0.2149	0.0682	0.2075	0.2296	0.0393
YFR045W	YFR045W	-0.3936	0.1077	-0.143	0.3545	0.2282	0.0449
YFR046C	CNN1	0.149	0.2239	0.1864	0.053	0.2326	0.0398
YFR047C	BNA6	0.3821	-0.0904	0.1459	0.3341	0.2326	0.0421
YFR048W	RMD8	0.3779	-0.2402	0.0689	0.4371	0.2317	0.0405
YFR049W	YMR31	0.2645	-0.0238	0.1203	0.2038	0.2329	0.0433
YFR053C	HXK1	0.016	-0.3267	-0.1553	0.2423	0.2295	0.0429
YFR054C	YFR054C	0.0205	-0.1943	-0.0869	0.1519	0.2289	0.0445
YFR055W	YFR055W	0.557	0.0257	0.2914	0.3757	0.2354	0.0414
YFR056C	YFR056C	0.4424	0.5678	0.5051	0.0886	0.2375	0.0387
YFR057W	YFR057W	0.2031	0.0423	0.1227	0.1137	0.2324	0.0416
YGL002W	ERP6	0.3039	0.308	0.3059	0.0028	0.2382	0.0395
YGL003C	CDH1	-0.3772	-0.1428	-0.26	0.1658	0.2266	0.0471
YGL004C	RPN14	0.1247	-0.1784	-0.0269	0.2143	0.232	0.0401
YGL005C	COG7	-0.2942	-0.0542	-0.1742	0.1697	0.2289	0.0412
YGL006W	PMC1	0.1262	0.1444	0.1353	0.0129	0.2335	0.0427
YGL007W	YGL007W	-0.0836	0.3074	0.1119	0.2765	0.2337	0.0415
YGL010W	YGL010W	0.0082	0.2419	0.1251	0.1652	0.2407	0.0427
YGL012W	ERG4	-0.0266	0.0627	0.018	0.0631	0.2347	0.0468
YGL013C	PDR1	-0.4201	0.0357	-0.1922	0.3223	0.2264	0.041
YGL014W	PUF4	0.0052	-0.2252	-0.11	0.163	0.2305	0.0429
YGL015C	YGL015C	-0.263	-0.1968	-0.2299	0.0468	0.2281	0.0425
YGL016W	KAP122	-0.0492	-0.1574	-0.1033	0.0765	0.2276	0.0392
YGL017W	ATE1	-0.0478	-0.0244	-0.0361	0.0165	0.2297	0.0431
YGL019W	CKB1	-0.0074	-0.241	-0.1242	0.1652	0.2305	0.0429
YGL021W	ALK1	0.1595	0.2301	0.1948	0.0499	0.2337	0.0421
YGL023C	PIB2	0.8116	0.7859	0.7987	0.0182	0.2489	0.035
YGL024W	YGL024W	0.0624	-0.2252	-0.0814	0.2034	0.2305	0.0429
YGL025C	PGD1	-0.718	-0.5207	-0.6193	0.1395	0.2183	0.0442
YGL026C	TRP5	0.1486	-0.1031	0.0228	0.178	0.2338	0.0423
YGL027C	CWH41	-0.1797	0.2068	0.0135	0.2733	0.2304	0.0415
YGL028C	SCW11	-0.5438	-0.8894	-0.7166	0.2444	0.2173	0.0428
YGL029W	CGR1	-0.6887	-0.6182	-0.6535	0.0499	0.2189	0.042
YGL031C	RPL24A	-0.4142	-0.5479	-0.481	0.0945	0.2209	0.0422
YGL032C	AGA2	0.4209	0.5065	0.4637	0.0606	0.2372	0.0392
YGL033W	HOP2	0.6345	1.171	0.9027	0.3793	0.2518	0.0434
YGL034C	YGL034C	0.2918	-0.2103	0.0408	0.355	0.2333	0.0434
YGL035C	MIG1	0.1483	-0.0631	0.0426	0.1494	0.2336	0.0439
YGL036W	YGL036W	0.1262	-0.0971	0.0145	0.1579	0.2307	0.0427
YGL037C	PNC1	0.1187	0.1096	0.1142	0.0064	0.2362	0.0422
YGL039W	YGL039W	0.1951	-0.0023	0.0964	0.1396	0.2322	0.0433
YGL041C	YGL041C	0.2531	-0.1633	0.0449	0.2944	0.2351	0.0409
YGL042C	YGL042C	-0.2657	-0.2347	-0.2502	0.0219	0.2256	0.0424
YGL043W	DST1	-0.2445	-0.0796	-0.1621	0.1166	0.2272	0.0427
YGL045W	RIM8	0.9589	0.7822	0.8706	0.1249	0.2468	0.0418
YGL046W	YGL046W	0.6987	0.6286	0.6636	0.0496	0.242	0.0409
YGL049C	TIF4632	0.0646	-0.159	-0.0472	0.1582	0.2295	0.0432
YGL050W	YGL050W	0.5414	0.1614	0.3514	0.2687	0.2367	0.0427
YGL051W	MST27	0.1492	0.4281	0.2886	0.1972	0.2329	0.0386
YGL053W	PRM8	0.1396	-0.1327	0.0034	0.1925	0.23	0.0409
YGL054C	ERV14	1.4236	0.3852	0.9044	0.7342	0.2516	0.0442
YGL056C	SDS23	0.1867	0.0852	0.1359	0.0718	0.2344	0.0419
YGL057C	YGL057C	-0.0231	0.2165	0.0967	0.1694	0.2323	0.0429
YGL059W	YGL059W	-0.0327	-0.0768	-0.0547	0.0312	0.229	0.0405
YGL060W	YBP2	0.5667	0.0421	0.3044	0.3709	0.2385	0.0398
YGL062W	PYC1	0.0808	-0.1907	-0.0549	0.192	0.2293	0.043
YGL063W	PUS2	0.5967	0	0.2984	0.4219	0.2353	0.0362
YGL064C	MRH4	-0.2898	-1.2929	-0.7914	0.7093	0.2166	0.044
YGL066W	SGF73	0.1049	0.7309	0.4179	0.4426	0.2451	0.0443
YGL067W	NPY1	-0.1101	0.0447	-0.0327	0.1094	0.2297	0.0423
YGL072C	YGL072C	-0.0259	-0.6434	-0.3346	0.4366	0.2227	0.0402
YGL076C	RPL7A	-1.6	-1.4059	-1.5029	0.1373	0.1983	0.046
YGL077C	HNM1	0.4457	0.301	0.3734	0.1023	0.2368	0.042
YGL078C	DBP3	-0.4881	-0.3558	-0.4219	0.0936	0.2247	0.0429
YGL079W	YGL079W	0.1288	-0.0815	0.0236	0.1487	0.2306	0.0422
YGL080W	FMP37	-0.1464	0.1505	0.0021	0.2099	0.2302	0.0419
YGL081W	YGL081W	-0.3879	-0.4557	-0.4218	0.0479	0.2252	0.0474
YGL082W	YGL082W	0.2837	0.0612	0.1725	0.1574	0.2331	0.0422
YGL083W	SCY1	-0.1888	-0.0982	-0.1435	0.0641	0.2297	0.0421
YGL084C	GUP1	-2.2124	-2.4638	-2.3381	0.1778	0.1524	0.0514
YGL085W	YGL085W	-0.0065	0.1571	0.0753	0.1157	0.2321	0.0435
YGL086W	MAD1	-0.2422	-0.045	-0.1436	0.1394	0.2278	0.0426
YGL087C	MMS2	0.6667	0.2745	0.4706	0.2774	0.239	0.0384
YGL089C	MF(ALPHA)2	0.1099	0.1779	0.1439	0.0481	0.2341	0.0446
YGL090W	LIF1	-0.1507	0.3291	0.0892	0.3393	0.2304	0.0365
YGL094C	PAN2	-0.03	0.1174	0.0437	0.1042	0.2337	0.046
YGL096W	TOS8	-0.1372	0.0747	-0.0313	0.1499	0.2299	0.0434
YGL101W	YGL101W	0.0052	-0.2252	-0.11	0.163	0.2299	0.0427
YGL104C	VPS73	0.2073	0.0493	0.1283	0.1117	0.243	0.0371
YGL105W	ARC1	-1.6428	-1.5264	-1.5846	0.0823	0.191	0.0481
YGL107C	RMD9	-0.4589	-0.9946	-0.7267	0.3788	0.2166	0.0461
YGL108C	YGL108C	0.0706	-0.1943	-0.0619	0.1873	0.231	0.0431
YGL109W	YGL109W	0.6471	0.7892	0.7182	0.1005	0.2531	0.0357
YGL110C	CUE3	-0.5155	-0.527	-0.5213	0.0081	0.2195	0.0478
YGL114W	YGL114W	-0.3128	0.1082	-0.1023	0.2977	0.2282	0.0409
YGL115W	SNF4	0.0205	-0.2252	-0.1024	0.1738	0.2305	0.0429
YGL117W	YGL117W	0.1403	0.0634	0.1019	0.0543	0.2319	0.0409
YGL121C	GPG1	0.4233	-0.3987	0.0123	0.5812	0.2301	0.0421
YGL124C	MON1	-0.4443	-0.5839	-0.5141	0.0988	0.2208	0.0448
YGL125W	MET13	0.152	0.0245	0.0882	0.0901	0.2338	0.0467
YGL126W	SCS3	-0.2182	-0.1734	-0.1958	0.0317	0.227	0.044
YGL127C	SOH1	-0.0645	-0.4061	-0.2353	0.2416	0.2266	0.0449
YGL129C	RSM23	-0.4621	-0.659	-0.5606	0.1392	0.2207	0.0455
YGL131C	SNT2	0.2156	0.039	0.1273	0.1248	0.2324	0.0424
YGL132W	YGL132W	0.5554	0.3914	0.4734	0.116	0.2413	0.0424
YGL133W	ITC1	-0.1891	-0.148	-0.1685	0.0291	0.2276	0.0433
YGL135W	RPL1B	-1.4938	-1.4957	-1.4948	0.0013	0.1954	0.043
YGL136C	MRM2	1.0521	0.9893	1.0207	0.0444	0.2511	0.0503
YGL138C	YGL138C	0.374	0.3931	0.3836	0.0135	0.2377	0.0414
YGL139W	YGL139W	0.3934	0.2425	0.318	0.1067	0.2358	0.0419
YGL140C	YGL140C	-0.1904	-0.3552	-0.2728	0.1165	0.2254	0.0423
YGL141W	HUL5	0.6944	0.0605	0.3774	0.4483	0.2379	0.042
YGL143C	MRF1	0.1036	-0.6699	-0.2832	0.547	0.2257	0.0437
YGL144C	ROG1	0.1584	0.1521	0.1552	0.0044	0.2333	0.044
YGL146C	YGL146C	0.0406	0.1346	0.0876	0.0665	0.232	0.0422
YGL147C	RPL9A	-0.8273	-0.1827	-0.505	0.4559	0.2225	0.0443
YGL148W	ARO2	-0.3374	0.482	0.0723	0.5794	0.2342	0.0457
YGL149W	YGL149W	-0.7898	-0.1609	-0.4753	0.4447	0.2217	0.0435
YGL151W	NUT1	-0.0589	0.0406	-0.0092	0.0703	0.2305	0.0423
YGL152C	YGL152C	-0.2294	-0.0564	-0.1429	0.1223	0.2277	0.042
YGL153W	PEX14	-0.0939	0.3154	0.1107	0.2894	0.2313	0.0417
YGL154C	LYS5	-0.1373	0.2495	0.0561	0.2735	0.2305	0.0408
YGL156W	AMS1	0.076	0.1166	0.0963	0.0287	0.2317	0.0417
YGL157W	YGL157W	0.2066	0.9484	0.5775	0.5246	0.2434	0.0467
YGL158W	RCK1	-0.0066	-0.0855	-0.0461	0.0558	0.2325	0.0442
YGL159W	YGL159W	0.0272	-0.0042	0.0115	0.0222	0.2306	0.0429
YGL160W	YGL160W	-0.4008	0.0187	-0.1911	0.2966	0.2268	0.0426
YGL161C	YIP5	-0.0763	-0.0452	-0.0607	0.022	0.2312	0.0427
YGL162W	SUT1	-0.0735	-0.1169	-0.0952	0.0307	0.2289	0.0429
YGL163C	RAD54	0.2977	0.2133	0.2555	0.0597	0.2344	0.0404
YGL164C	YRB30	0.0829	0.2338	0.1584	0.1067	0.2332	0.0427
YGL165C	YGL165C	-0.2295	-0.1388	-0.1841	0.0641	0.2288	0.0421
YGL166W	CUP2	0.0076	0.044	0.0258	0.0257	0.2327	0.0426
YGL170C	SPO74	0.293	0.2994	0.2962	0.0045	0.2352	0.0387
YGL173C	KEM1	-0.3927	0.0928	-0.15	0.3433	0.2287	0.0473
YGL174W	BUD13	-0.2071	-0.2718	-0.2395	0.0458	0.2266	0.0459
YGL175C	SAE2	1.2331	0.5074	0.8702	0.5132	0.246	0.0387
YGL176C	YGL176C	0.0432	0.027	0.0351	0.0115	0.2314	0.0433
YGL177W	YGL177W	0.246	0.263	0.2545	0.012	0.2362	0.044
YGL179C	TOS3	-0.0647	-0.4384	-0.2516	0.2643	0.2189	0.0428
YGL180W	ATG1	-0.0548	-0.0917	-0.0732	0.0261	0.2309	0.0427
YGL181W	GTS1	-0.1675	0.0842	-0.0417	0.178	0.2296	0.0395
YGL194C	HOS2	0.7436	0.1673	0.4554	0.4075	0.2391	0.0423
YGL195W	GCN1	0.1469	-0.4403	-0.1467	0.4152	0.2177	0.047
YGL197W	MDS3	-0.6823	-0.9407	-0.8115	0.1827	0.2141	0.0403
YGL198W	YIP4	-0.2719	-0.1614	-0.2166	0.0781	0.2281	0.0425
YGL199C	YGL199C	-0.3936	0.4952	0.0508	0.6285	0.2319	0.0443
YGL200C	EMP24	-0.0074	-0.2069	-0.1071	0.1411	0.2313	0.0421
YGL202W	ARO8	0.03	-0.2069	-0.0884	0.1675	0.2267	0.0416
YGL203C	KEX1	-0.2909	-0.3303	-0.3106	0.0278	0.2248	0.0423
YGL205W	POX1	0.2213	0.3354	0.2783	0.0807	0.2379	0.0357
YGL208W	SIP2	-0.0942	0.1152	0.0105	0.1481	0.2309	0.0432
YGL209W	MIG2	0.0165	0.2024	0.1094	0.1314	0.2311	0.0412
YGL210W	YPT32	-0.0326	-0.0913	-0.0619	0.0415	0.2326	0.0401
YGL211W	YGL211W	-0.0867	-0.3679	-0.2273	0.1988	0.2265	0.0466
YGL212W	VAM7	-0.3669	-0.782	-0.5745	0.2936	0.2198	0.0451
YGL213C	SKI8	0.8318	-0.0767	0.3776	0.6424	0.237	0.0385
YGL214W	YGL214W	0.2197	-0.3716	-0.076	0.4181	0.2296	0.0444
YGL215W	CLG1	0.7439	0.9398	0.8418	0.1386	0.2476	0.042
YGL216W	KIP3	-0.039	-0.4068	-0.2229	0.2601	0.228	0.0472
YGL217C	YGL217C	-0.2923	0.0124	-0.1399	0.2155	0.2274	0.0432
YGL218W	SRF1	-0.271	-0.103	-0.187	0.1187	0.2269	0.049
YGL219C	MDM34	-0.7368	-0.8739	-0.8053	0.097	0.2144	0.0477
YGL221C	NIF3	-0.3867	0.2127	-0.087	0.4238	0.2284	0.0409
YGL222C	EDC1	-0.405	-0.1143	-0.2596	0.2055	0.2249	0.0414
YGL226C-A	OST5	0.3864	0.3042	0.3453	0.0582	0.246	0.0395
YGL226W	YGL226W	-0.1284	-0.2254	-0.1769	0.0686	0.2206	0.0434
YGL227W	VID30	0.0905	-0.0444	0.023	0.0954	0.2318	0.0423
YGL228W	SHE10	0.2526	-0.0318	0.1104	0.2011	0.2349	0.0419
YGL229C	SAP4	0.1366	-0.0023	0.0672	0.0982	0.2314	0.0411
YGL231C	YGL231C	0.3105	-0.3931	-0.0413	0.4975	0.2299	0.0435
YGL232W	TAN1	0.1019	0.1613	0.1316	0.0419	0.2366	0.0427
YGL235W	YGL235W	-0.0882	-0.0438	-0.066	0.0314	0.2294	0.0437
YGL236C	MTO1	-0.0749	0.0056	-0.0347	0.0569	0.2262	0.0397
YGL237C	HAP2	-0.0074	-0.2095	-0.1084	0.1429	0.2305	0.0429
YGL241W	KAP114	0.28	0.7085	0.4943	0.303	0.2437	0.0416
YGL242C	YGL242C	0.7537	0.4874	0.6205	0.1883	0.2396	0.0373
YGL243W	TAD1	0.2584	-0.0183	0.12	0.1957	0.2311	0.041
YGL244W	RTF1	0.4369	-0.0018	0.2176	0.3102	0.2379	0.0447
YGL246C	RAI1	-0.4568	-1.1204	-0.7886	0.4692	0.2103	0.04
YGL248W	PDE1	0.1762	0.1156	0.1459	0.0428	0.2339	0.0443
YGL249W	ZIP2	-0.1269	-0.4545	-0.2907	0.2316	0.2256	0.0435
YGL250W	YGL250W	-0.4335	-0.0202	-0.2269	0.2923	0.2211	0.0441
YGL251C	HFM1	-0.0552	-0.1597	-0.1075	0.0739	0.2295	0.0412
YGL252C	RTG2	-0.0859	-0.5543	-0.3201	0.3312	0.2251	0.0463
YGL253W	HXK2	-0.38	-0.5112	-0.4456	0.0928	0.2224	0.0443
YGL254W	FZF1	0.1659	0.1222	0.1441	0.0309	0.2324	0.0411
YGL255W	ZRT1	0.6849	0.0975	0.3912	0.4154	0.2448	0.0364
YGL256W	ADH4	0.269	-0.2495	0.0097	0.3666	0.2309	0.043
YGL257C	MNT2	0.0088	0.7206	0.3647	0.5033	0.2353	0.0369
YGL258W	VEL1	-0.2057	0.102	-0.0518	0.2176	0.2295	0.0419
YGL259W	YPS5	0.289	-0.191	0.049	0.3394	0.2329	0.0446
YGL260W	YGL260W	0.034	-0.213	-0.0895	0.1746	0.2284	0.0402
YGL261C	YGL261C	0.018	0.1348	0.0764	0.0826	0.2331	0.0448
YGL262W	YGL262W	-0.1384	0.118	-0.0102	0.1813	0.2297	0.0384
YGL263W	COS12	0.154	0.4517	0.3028	0.2105	0.2361	0.0418
YGR001C	YGR001C	0.0574	0.003	0.0302	0.0384	0.2313	0.043
YGR003W	CUL3	-0.549	-0.0324	-0.2907	0.3653	0.2248	0.0461
YGR004W	YGR004W	0.4068	0.1402	0.2735	0.1885	0.2352	0.0404
YGR006W	PRP18	-0.0074	-0.2095	-0.1084	0.1429	0.2305	0.0429
YGR007W	MUQ1	-0.1263	-0.4436	-0.2849	0.2244	0.2273	0.0431
YGR008C	STF2	0.3273	0.17	0.2486	0.1112	0.2348	0.0421
YGR010W	NMA2	0.2288	0.0202	0.1245	0.1475	0.2325	0.0409
YGR011W	YGR011W	-0.4999	0.4293	-0.0353	0.6571	0.2303	0.0436
YGR012W	YGR012W	-0.087	-0.305	-0.196	0.1542	0.2282	0.0414
YGR014W	MSB2	0.0207	0.0855	0.0531	0.0459	0.2301	0.0399
YGR015C	YGR015C	0.1933	0.3931	0.2932	0.1413	0.2389	0.0345
YGR016W	YGR016W	-0.1932	-0.3632	-0.2782	0.1201	0.2255	0.0422
YGR017W	YGR017W	-0.1197	0.6456	0.263	0.5411	0.2324	0.0352
YGR018C	YGR018C	0.1939	-0.0759	0.059	0.1908	0.2315	0.0424
YGR019W	UGA1	-0.0585	0.5016	0.2216	0.3961	0.2343	0.0413
YGR021W	YGR021W	0.3421	0.5685	0.4553	0.1601	0.2372	0.0366
YGR022C	YGR022C	0.1647	0.7633	0.464	0.4233	0.2392	0.0401
YGR023W	MTL1	0.6751	0.2533	0.4642	0.2983	0.2386	0.0408
YGR025W	YGR025W	-0.2279	-0.0302	-0.129	0.1399	0.2285	0.0442
YGR026W	YGR026W	-0.1399	0.0774	-0.0313	0.1536	0.2304	0.0429
YGR028W	MSP1	0.3174	-0.1125	0.1025	0.304	0.234	0.042
YGR031W	YGR031W	-0.1345	-0.1311	-0.1328	0.0024	0.2326	0.0408
YGR032W	GSC2	0.0193	0.0245	0.0219	0.0037	0.2253	0.042
YGR033C	FMP17	-0.0967	0.2779	0.0906	0.2649	0.2323	0.0431
YGR034W	RPL26B	-0.3314	-0.006	-0.1687	0.2301	0.2257	0.0342
YGR035C	YGR035C	0.4639	0.15	0.307	0.222	0.2347	0.0392
YGR036C	CAX4	-1.2625	-0.9773	-1.1199	0.2017	0.2075	0.0482
YGR037C	ACB1	0.0771	-0.3762	-0.1496	0.3205	0.2294	0.0423
YGR038W	ORM1	-0.0094	-0.1382	-0.0738	0.0911	0.2307	0.0425
YGR039W	YGR039W	0.0832	-0.2039	-0.0604	0.203	0.2293	0.0422
YGR040W	KSS1	-0.0617	-0.2364	-0.1491	0.1235	0.2292	0.0447
YGR041W	BUD9	0.0861	0.2805	0.1833	0.1375	0.2335	0.0407
YGR042W	YGR042W	0.2535	0.1738	0.2136	0.0563	0.2357	0.0454
YGR043C	YGR043C	0.0656	0.0478	0.0567	0.0125	0.2311	0.0405
YGR044C	RME1	0.4274	0.0806	0.254	0.2452	0.2352	0.0424
YGR045C	YGR045C	0.115	0.4295	0.2723	0.2224	0.2356	0.0431
YGR049W	SCM4	0.0903	-0.0434	0.0234	0.0946	0.2328	0.0424
YGR050C	YGR050C	0.475	0.1924	0.3337	0.1998	0.2412	0.0429
YGR051C	YGR051C	0.5242	0.2476	0.3859	0.1955	0.2353	0.0392
YGR052W	FMP48	0.2112	-0.0785	0.0663	0.2049	0.2313	0.0409
YGR053C	YGR053C	0.2891	0.2508	0.27	0.027	0.235	0.0423
YGR054W	YGR054W	-0.0826	0.0093	-0.0366	0.065	0.2304	0.0439
YGR055W	MUP1	0.1735	-0.0645	0.0545	0.1683	0.2305	0.0409
YGR056W	RSC1	0.058	0.5024	0.2802	0.3142	0.2385	0.0448
YGR057C	LST7	0.0048	-0.1895	-0.0923	0.1374	0.233	0.0403
YGR058W	YGR058W	-0.1977	0.4934	0.1479	0.4887	0.233	0.0422
YGR059W	SPR3	0.1441	-0.2927	-0.0743	0.3089	0.2295	0.0477
YGR061C	ADE6	0.1237	0.1719	0.1478	0.0341	0.2348	0.0411
YGR062C	COX18	-0.1046	-0.586	-0.3453	0.3404	0.2254	0.0427
YGR063C	SPT4	0.0741	-0.8515	-0.3887	0.6545	0.2241	0.0439
YGR064W	YGR064W	-1.0597	-1.798	-1.4289	0.5221	0.196	0.046
YGR066C	YGR066C	-0.0111	-0.2764	-0.1438	0.1876	0.2277	0.0424
YGR067C	YGR067C	-0.0223	0.0953	0.0365	0.0832	0.2309	0.0424
YGR068C	YGR068C	0.0245	-0.006	0.0093	0.0216	0.2305	0.0414
YGR069W	YGR069W	0.2314	0.2823	0.2568	0.036	0.2341	0.0411
YGR070W	ROM1	0.6589	0.2482	0.4535	0.2904	0.2403	0.0391
YGR071C	YGR071C	0.5586	0.3887	0.4737	0.1201	0.2389	0.0422
YGR072W	UPF3	0.699	0.4156	0.5573	0.2004	0.2402	0.0431
YGR076C	MRPL25	-0.4337	-1.1197	-0.7767	0.4851	0.2143	0.0473
YGR077C	PEX8	-0.0427	-0.3414	-0.192	0.2112	0.2271	0.0423
YGR078C	PAC10	-0.2454	-0.1594	-0.2024	0.0608	0.2264	0.0399
YGR079W	YGR079W	0.1569	0.0372	0.0971	0.0846	0.2333	0.0405
YGR080W	TWF1	-0.3865	-0.2741	-0.3303	0.0795	0.2248	0.042
YGR081C	SLX9	0.1562	-0.2874	-0.0656	0.3137	0.2288	0.0414
YGR084C	MRP13	0.3951	0.1492	0.2722	0.1739	0.2352	0.0422
YGR085C	RPL11B	-0.9591	-0.8189	-0.889	0.0992	0.2138	0.0449
YGR086C	PIL1	-0.3117	-0.6862	-0.4989	0.2648	0.2224	0.0502
YGR087C	PDC6	0.4717	0.4348	0.4532	0.0261	0.2377	0.0392
YGR088W	CTT1	-0.0057	0.0887	0.0415	0.0668	0.2307	0.0414
YGR089W	NNF2	0.0529	-0.3513	-0.1492	0.2858	0.228	0.0435
YGR092W	DBF2	-0.6567	-0.1149	-0.3858	0.3831	0.2233	0.0419
YGR093W	YGR093W	0.2353	0.0344	0.1349	0.1421	0.24	0.0379
YGR096W	TPC1	0.3802	-0.1283	0.1259	0.3596	0.2278	0.0415
YGR097W	ASK10	0.0205	-0.2101	-0.0948	0.1631	0.2305	0.0429
YGR100W	MDR1	-0.0849	-0.1722	-0.1286	0.0617	0.2302	0.0434
YGR104C	SRB5	-1.2833	-1.1013	-1.1923	0.1287	0.1929	0.0561
YGR106C	YGR106C	0.2302	-0.104	0.0631	0.2363	0.2333	0.0422
YGR107W	YGR107W	0.4982	0.3838	0.441	0.0809	0.2419	0.0358
YGR108W	CLB1	0.4294	0.4963	0.4629	0.0473	0.2421	0.0426
YGR109C	CLB6	0.0257	0.0606	0.0431	0.0247	0.2327	0.0412
YGR110W	YGR110W	0.0746	-0.1504	-0.0379	0.1591	0.2311	0.0413
YGR111W	YGR111W	-0.3726	-0.2703	-0.3214	0.0723	0.2241	0.0433
YGR112W	SHY1	-0.0018	-0.6241	-0.313	0.44	0.2249	0.0442
YGR117C	YGR117C	-0.1739	0.0811	-0.0464	0.1803	0.231	0.0413
YGR118W	RPS23A	-0.6415	-0.3226	-0.482	0.2255	0.2235	0.0445
YGR121C	MEP1	0.0927	-0.1083	-0.0078	0.1421	0.2309	0.0433
YGR122C-A	YGR122C-A	0.2719	0.027	0.1495	0.1732	0.2332	0.0427
YGR122W	YGR122W	0.1205	0.3515	0.236	0.1633	0.2364	0.0419
YGR123C	PPT1	0.0628	0.2072	0.135	0.1021	0.2329	0.0429
YGR124W	ASN2	0.4091	-0.0251	0.192	0.307	0.2336	0.042
YGR125W	YGR125W	0.5207	0.464	0.4924	0.0401	0.2394	0.0425
YGR126W	YGR126W	0.3423	0.2215	0.2819	0.0854	0.2359	0.0433
YGR127W	YGR127W	-0.0621	-0.0385	-0.0503	0.0167	0.229	0.0408
YGR129W	SYF2	0.5751	0.5163	0.5457	0.0416	0.2397	0.0393
YGR130C	YGR130C	0.4941	0.0689	0.2815	0.3006	0.2394	0.0407
YGR131W	YGR131W	-0.0526	-0.149	-0.1008	0.0682	0.2316	0.0428
YGR132C	PHB1	0.445	-0.2332	0.1059	0.4795	0.2324	0.0422
YGR133W	PEX4	-0.3835	-0.3265	-0.355	0.0403	0.2259	0.0418
YGR134W	CAF130	0.1429	0.1102	0.1265	0.0232	0.2326	0.0429
YGR135W	PRE9	0.31	-0.1969	0.0565	0.3584	0.2326	0.0468
YGR136W	LSB1	-0.0744	-0.1394	-0.1069	0.0459	0.2284	0.043
YGR137W	YGR137W	-0.0824	0.2816	0.0996	0.2574	0.2323	0.0434
YGR138C	TPO2	0.1852	0.0314	0.1083	0.1087	0.2323	0.0424
YGR139W	YGR139W	-0.0069	-0.261	-0.134	0.1796	0.2238	0.0445
YGR141W	VPS62	0.0861	-0.3248	-0.1193	0.2905	0.2279	0.0416
YGR142W	BTN2	-0.1695	-0.0934	-0.1314	0.0538	0.2283	0.0442
YGR143W	SKN1	-0.2907	-0.15	-0.2203	0.0995	0.2266	0.044
YGR144W	THI4	-0.0674	-0.1343	-0.1008	0.0473	0.2284	0.0432
YGR146C	YGR146C	0.0856	-0.3113	-0.1129	0.2807	0.2302	0.0424
YGR148C	RPL24B	-0.666	-0.4535	-0.5598	0.1503	0.2206	0.0423
YGR149W	YGR149W	0.1501	-0.3574	-0.1037	0.3589	0.2288	0.0433
YGR150C	YGR150C	-0.3973	-0.9095	-0.6534	0.3622	0.2178	0.048
YGR151C	YGR151C	0.0544	0.2421	0.1482	0.1328	0.234	0.0333
YGR152C	RSR1	0.0425	-0.3823	-0.1699	0.3003	0.227	0.0419
YGR153W	YGR153W	0.1317	0.0728	0.1023	0.0417	0.2317	0.0406
YGR154C	YGR154C	0.2273	-0.0137	0.1068	0.1704	0.2324	0.0427
YGR155W	CYS4	0.087	0.5178	0.3024	0.3047	0.2347	0.0375
YGR157W	CHO2	0.0197	0.219	0.1194	0.141	0.2302	0.036
YGR159C	NSR1	-0.8592	-1.9405	-1.3998	0.7646	0.2011	0.0456
YGR160W	YGR160W	-0.786	-0.8969	-0.8415	0.0784	0.215	0.0442
YGR161C	RTS3	0.1157	0.0462	0.0809	0.0492	0.2321	0.0429
YGR163W	GTR2	-1.3807	-0.4701	-0.9254	0.6439	0.2136	0.0428
YGR164W	YGR164W	0.3025	0.0077	0.1551	0.2084	0.2334	0.0422
YGR165W	MRPS35	-0.508	-0.5113	-0.5096	0.0023	0.2208	0.0469
YGR166W	KRE11	-0.2952	-0.397	-0.3461	0.072	0.2243	0.0422
YGR168C	YGR168C	0.2774	-0.0522	0.1126	0.233	0.2314	0.0414
YGR169C	PUS6	0.5362	0.0803	0.3082	0.3224	0.2346	0.0411
YGR170W	PSD2	0.7122	0.6288	0.6705	0.0589	0.2419	0.0399
YGR171C	MSM1	-0.7631	-1.1972	-0.9802	0.3069	0.2132	0.0441
YGR173W	GIR1	0.1097	-0.1011	0.0043	0.149	0.23	0.0409
YGR174C	CBP4	0.3743	-0.4189	-0.0223	0.5609	0.2328	0.0357
YGR176W	YGR176W	0.2987	-0.0772	0.1108	0.2658	0.2322	0.042
YGR177C	ATF2	0.2807	-0.1043	0.0882	0.2722	0.2308	0.0401
YGR178C	PBP1	-0.5406	-0.0334	-0.287	0.3587	0.2254	0.0439
YGR181W	TIM13	0.4136	-0.1674	0.1231	0.4108	0.2312	0.0402
YGR182C	YGR182C	0.3355	0.0154	0.1755	0.2264	0.2334	0.0428
YGR183C	QCR9	-0.3643	-0.4746	-0.4195	0.078	0.223	0.0448
YGR184C	UBR1	0.1185	-0.2135	-0.0475	0.2348	0.2319	0.044
YGR187C	HGH1	0.0558	0.1479	0.1019	0.0651	0.2317	0.0425
YGR188C	BUB1	-0.8524	-0.5524	-0.7024	0.2122	0.2146	0.0513
YGR189C	CRH1	-0.2187	-0.2123	-0.2155	0.0046	0.2282	0.0417
YGR192C	TDH3	0.2618	0.4357	0.3487	0.123	0.2357	0.0405
YGR193C	PDX1	0.0742	0.5417	0.3079	0.3306	0.2338	0.0373
YGR194C	XKS1	0.1826	0.0046	0.0936	0.1258	0.2307	0.0394
YGR196C	FYV8	0.1914	-0.0817	0.0549	0.1931	0.2317	0.0438
YGR199W	PMT6	0.0664	-0.2055	-0.0695	0.1923	0.2309	0.0417
YGR200C	ELP2	-0.6397	-0.4401	-0.5399	0.1412	0.2225	0.043
YGR201C	YGR201C	0.4617	0.1287	0.2952	0.2354	0.2363	0.0434
YGR202C	PCT1	0.3299	0.271	0.3005	0.0416	0.2353	0.0418
YGR203W	YGR203W	0.2557	0.045	0.1504	0.149	0.2323	0.0414
YGR204W	ADE3	-0.6351	-0.1568	-0.3959	0.3382	0.2223	0.0432
YGR205W	YGR205W	0.5195	-0.126	0.1967	0.4565	0.2331	0.041
YGR206W	YGR206W	-0.0024	-0.4332	-0.2178	0.3046	0.2281	0.0422
YGR207C	YGR207C	0.0089	-0.037	-0.0141	0.0325	0.231	0.0425
YGR208W	SER2	0.0065	-0.1096	-0.0516	0.0821	0.2313	0.0424
YGR209C	TRX2	-0.0904	0.337	0.1233	0.3022	0.2323	0.0408
YGR210C	YGR210C	-0.0274	0.1892	0.0809	0.1531	0.2317	0.0425
YGR212W	YGR212W	0.266	0.0368	0.1514	0.1621	0.2324	0.0417
YGR213C	RTA1	-0.2447	0.2837	0.0195	0.3736	0.2314	0.0445
YGR214W	RPS0A	-0.2789	-0.5489	-0.4139	0.1909	0.2247	0.0433
YGR215W	RSM27	-0.2583	-0.8256	-0.5419	0.4012	0.22	0.0455
YGR220C	MRPL9	-0.2707	-0.5446	-0.4077	0.1937	0.2231	0.0429
YGR221C	TOS2	0.0273	-0.2482	-0.1105	0.1948	0.2279	0.0413
YGR223C	YGR223C	-0.6721	-0.3337	-0.5029	0.2393	0.2214	0.045
YGR224W	AZR1	0.734	0.6939	0.7139	0.0283	0.2428	0.0399
YGR225W	AMA1	-0.0926	0.0324	-0.0301	0.0883	0.2317	0.0427
YGR226C	YGR226C	-0.3968	0.2738	-0.0615	0.4741	0.2309	0.0411
YGR227W	DIE2	0.8449	0.1779	0.5114	0.4716	0.2389	0.0406
YGR228W	YGR228W	1.3113	0.5367	0.924	0.5477	0.2475	0.0396
YGR229C	SMI1	0.1479	-0.0389	0.0545	0.1321	0.2298	0.0453
YGR230W	BNS1	-0.1374	-0.0181	-0.0778	0.0844	0.2377	0.0409
YGR231C	PHB2	0.3483	0.1522	0.2503	0.1387	0.2372	0.0421
YGR232W	NAS6	0.0211	0.0182	0.0196	0.0021	0.2304	0.0418
YGR233C	PHO81	0.526	0.1239	0.325	0.2843	0.2369	0.0425
YGR234W	YHB1	-0.0549	-0.1413	-0.0981	0.0611	0.2285	0.0422
YGR235C	YGR235C	-0.2807	0.1207	-0.08	0.2838	0.2282	0.0398
YGR236C	SPG1	0.2044	-0.1738	0.0153	0.2674	0.2308	0.0428
YGR237C	YGR237C	0.5064	-0.1619	0.1723	0.4725	0.2335	0.0432
YGR238C	KEL2	0.5591	0.6877	0.6234	0.091	0.2414	0.0409
YGR239C	PEX21	0.3662	-0.1545	0.1058	0.3682	0.2343	0.0423
YGR240C	PFK1	-0.6902	-1.4132	-1.0517	0.5113	0.2043	0.0532
YGR241C	YAP1802	0.1387	0.0674	0.1031	0.0504	0.2322	0.0429
YGR242W	YGR242W	0.3429	0.2743	0.3086	0.0485	0.2339	0.0397
YGR243W	FMP43	0.1597	-0.0818	0.0389	0.1707	0.2317	0.0447
YGR244C	LSC2	0.6549	0.6134	0.6342	0.0294	0.2396	0.0342
YGR247W	CPD1	0.4575	-0.1125	0.1725	0.4031	0.2334	0.0423
YGR249W	MGA1	0.2306	-0.1148	0.0579	0.2442	0.2337	0.0418
YGR250C	YGR250C	0.1348	-0.1227	0.006	0.1821	0.2303	0.0411
YGR254W	ENO1	0.1509	-0.1726	-0.0109	0.2287	0.2304	0.0427
YGR256W	GND2	0.1177	0.1564	0.137	0.0274	0.2316	0.0398
YGR258C	RAD2	0.053	-0.1069	-0.0269	0.113	0.2301	0.0441
YGR259C	YGR259C	0.2806	-0.0359	0.1224	0.2238	0.2314	0.0407
YGR260W	TNA1	0.2424	-0.0888	0.0768	0.2342	0.232	0.0438
YGR261C	APL6	0.0562	-0.1744	-0.0591	0.1631	0.2307	0.0423
YGR263C	YGR263C	0.6084	0.7214	0.6649	0.0799	0.2391	0.0341
YGR266W	YGR266W	0.3126	0.0396	0.1761	0.193	0.2326	0.0409
YGR268C	HUA1	0.085	0.4984	0.2917	0.2923	0.2356	0.0423
YGR270W	YTA7	0.0186	-0.097	-0.0392	0.0818	0.2299	0.0425
YGR271W	SLH1	-0.0176	-0.0728	-0.0452	0.039	0.2297	0.0425
YGR273C	YGR273C	-0.3206	-0.1248	-0.2227	0.1384	0.2282	0.0422
YGR275W	RTT102	0.8517	0.0126	0.4322	0.5934	0.2384	0.04
YGR276C	RNH70	0.1217	0.1125	0.1171	0.0065	0.234	0.0448
YGR279C	SCW4	0.2751	0.2242	0.2497	0.0359	0.2348	0.0431
YGR281W	YOR1	0.2024	0.039	0.1207	0.1155	0.2327	0.0429
YGR282C	BGL2	0.1429	-0.0818	0.0306	0.1589	0.2306	0.0412
YGR283C	YGR283C	-0.1266	-0.2255	-0.1761	0.0699	0.2302	0.0441
YGR284C	ERV29	0.1879	0.122	0.1549	0.0466	0.2331	0.0424
YGR285C	ZUO1	-0.0074	-0.1895	-0.0984	0.1288	0.2305	0.0429
YGR286C	BIO2	0.0585	-0.03	0.0142	0.0626	0.2312	0.0439
YGR287C	YGR287C	-0.0197	-0.1266	-0.0731	0.0755	0.2292	0.0443
YGR288W	MAL13	-0.0005	0.0164	0.008	0.0119	0.2305	0.0431
YGR289C	MAL11	0.2671	0.3202	0.2937	0.0375	0.2361	0.0426
YGR290W	YGR290W	0.2985	-0.0399	0.1293	0.2393	0.2322	0.0413
YGR291C	YGR291C	0.4647	-0.0585	0.2031	0.37	0.2346	0.0434
YGR292W	MAL12	0.0076	-0.0226	-0.0075	0.0213	0.2306	0.044
YGR295C	COS6	0.0404	-0.1084	-0.034	0.1052	0.229	0.0407
YHL002W	HSE1	0.1331	-0.3319	-0.0994	0.3288	0.2287	0.0436
YHL003C	LAG1	0.1777	-0.2135	-0.0179	0.2766	0.2302	0.044
YHL005C	YHL005C	0.0205	-0.2252	-0.1024	0.1738	0.2305	0.0429
YHL006C	SHU1	0.1049	0.2147	0.1598	0.0776	0.2304	0.0418
YHL007C	STE20	-0.1057	-0.2819	-0.1938	0.1246	0.229	0.0454
YHL008C	YHL008C	1.0941	-0.0674	0.5133	0.8213	0.2399	0.0415
YHL009C	YAP3	-0.145	-0.2758	-0.2104	0.0925	0.227	0.0431
YHL010C	YHL010C	-0.0353	-0.2822	-0.1588	0.1746	0.2274	0.0415
YHL011C	PRS3	-1.5095	-1.9021	-1.7058	0.2776	0.1985	0.0442
YHL012W	YHL012W	-0.0466	0.0516	0.0025	0.0695	0.2281	0.0393
YHL013C	YHL013C	0.0205	-0.2762	-0.1278	0.2098	0.2277	0.0445
YHL014C	YLF2	-0.0333	-0.2113	-0.1223	0.1259	0.2305	0.0429
YHL016C	DUR3	0.2634	-0.0136	0.1249	0.1959	0.2328	0.0424
YHL017W	YHL017W	0.3941	-0.2138	0.0902	0.4298	0.2326	0.0449
YHL019C	APM2	-0.0387	-0.1846	-0.1116	0.1032	0.2304	0.0448
YHL020C	OPI1	-0.4098	-0.1945	-0.3021	0.1522	0.225	0.0442
YHL021C	FMP12	0.4693	-0.2061	0.1316	0.4776	0.2329	0.0434
YHL022C	SPO11	0.0776	-0.0851	-0.0037	0.1151	0.2294	0.0456
YHL023C	RMD11	-0.3396	-0.8331	-0.5863	0.3489	0.2197	0.0467
YHL024W	RIM4	-0.327	-0.246	-0.2865	0.0573	0.2248	0.0438
YHL026C	YHL026C	0.0052	-0.2436	-0.1192	0.1759	0.2305	0.0429
YHL027W	RIM101	0.9245	0.4153	0.6699	0.3601	0.2417	0.0404
YHL028W	WSC4	0.1573	0.0732	0.1152	0.0595	0.2325	0.0433
YHL029C	YHL029C	0.1948	0.0151	0.105	0.1271	0.2324	0.0437
YHL030W	ECM29	0.448	0.4829	0.4654	0.0246	0.2379	0.0375
YHL031C	GOS1	-0.4659	-0.3227	-0.3943	0.1012	0.2234	0.0447
YHL032C	GUT1	-0.235	-0.103	-0.169	0.0933	0.2266	0.0433
YHL033C	RPL8A	-0.2169	-0.6338	-0.4254	0.2948	0.223	0.0428
YHL034C	SBP1	-0.2013	-0.4074	-0.3044	0.1457	0.2218	0.0446
YHL035C	VMR1	0.2863	-0.2802	0.003	0.4006	0.2308	0.0433
YHL036W	MUP3	-0.0032	0.0217	0.0093	0.0176	0.2307	0.0429
YHL037C	YHL037C	0.2418	0.0477	0.1447	0.1373	0.2338	0.0442
YHL038C	CBP2	-0.2352	-1.0328	-0.634	0.564	0.2158	0.0432
YHL039W	YHL039W	-0.1749	-0.0078	-0.0914	0.1182	0.2304	0.0428
YHL040C	ARN1	0.0396	-0.2963	-0.1283	0.2376	0.2282	0.0437
YHL041W	YHL041W	0.2319	0.0432	0.1375	0.1335	0.233	0.0426
YHL042W	YHL042W	0.0297	-0.033	-0.0016	0.0443	0.2309	0.0438
YHL043W	ECM34	0.1392	0.3284	0.2338	0.1338	0.2348	0.0427
YHL044W	YHL044W	-0.0074	-0.1911	-0.0992	0.1299	0.2305	0.0429
YHL045W	YHL045W	0.2943	0.3411	0.3177	0.0331	0.2367	0.0427
YHL046C	YHL046C	0.1357	-0.2337	-0.049	0.2612	0.2298	0.0432
YHL047C	ARN2	0.5931	0.3992	0.4962	0.1371	0.2386	0.0411
YHR001W-A	QCR10	0.0457	-0.3062	-0.1303	0.2489	0.2292	0.0421
YHR003C	YHR003C	-0.0313	0.0224	-0.0045	0.038	0.2302	0.0427
YHR004C	NEM1	-1.8303	-1.9053	-1.8678	0.0531	0.1941	0.0431
YHR005C	GPA1	0.2936	-0.3755	-0.041	0.4731	0.2297	0.0431
YHR006W	STP2	-0.0509	-0.0501	-0.0505	0.0006	0.2295	0.0433
YHR009C	YHR009C	0.0695	-0.1315	-0.031	0.1421	0.2316	0.0421
YHR011W	DIA4	-0.1942	-0.5349	-0.3646	0.2409	0.2175	0.058
YHR012W	VPS29	0.225	0.0408	0.1329	0.1303	0.231	0.0376
YHR014W	SPO13	0.0205	-0.1653	-0.0724	0.1314	0.2322	0.0448
YHR015W	MIP6	0.2911	0.3798	0.3355	0.0627	0.2377	0.0448
YHR016C	YSC84	-0.0074	-0.241	-0.1242	0.1652	0.2305	0.0429
YHR017W	YSC83	0.7291	0.1285	0.4288	0.4247	0.2391	0.0438
YHR018C	ARG4	-0.1502	-0.0474	-0.0988	0.0727	0.2211	0.0482
YHR021W-A	ECM12	-0.0628	-0.0372	-0.05	0.0181	0.2295	0.0432
YHR022C	YHR022C	0.4054	0.4341	0.4198	0.0203	0.237	0.0402
YHR025W	THR1	0.5398	-0.1361	0.2019	0.4779	0.2345	0.0435
YHR028C	DAP2	0.2849	-0.0979	0.0935	0.2706	0.2313	0.0417
YHR029C	YHR029C	-0.1496	0.2543	0.0523	0.2856	0.2311	0.0402
YHR030C	SLT2	0.0704	0.0103	0.0403	0.0425	0.2312	0.0427
YHR031C	RRM3	-0.1146	0.1916	0.0385	0.2165	0.2331	0.043
YHR032W	YHR032W	-0.2016	-0.1583	-0.1799	0.0306	0.2291	0.0434
YHR033W	YHR033W	-0.4435	-0.1847	-0.3141	0.183	0.2251	0.0419
YHR034C	YHR034C	-0.5089	-0.3726	-0.4408	0.0964	0.2278	0.0431
YHR035W	YHR035W	-0.1386	-0.0153	-0.0769	0.0872	0.2294	0.0426
YHR037W	PUT2	-0.1336	0.2683	0.0673	0.2842	0.2213	0.0381
YHR038W	RRF1	0.1352	-0.8822	-0.3735	0.7194	0.2301	0.0488
YHR039C	MSC7	0.8815	0.6237	0.7526	0.1823	0.2446	0.0415
YHR041C	SRB2	-0.4272	-0.2394	-0.3333	0.1328	0.2266	0.0461
YHR043C	DOG2	-0.1152	-0.2251	-0.1701	0.0777	0.2278	0.045
YHR044C	DOG1	0.3584	0.2417	0.3	0.0825	0.2356	0.0424
YHR045W	YHR045W	0.2288	0.0721	0.1505	0.1108	0.232	0.0412
YHR046C	INM1	0.1565	-0.0955	0.0305	0.1782	0.2303	0.0404
YHR047C	AAP1'	0.1684	0.3072	0.2378	0.0981	0.2336	0.0414
YHR049C-A	YHR049C-A	-0.13	0.0797	-0.0252	0.1482	0.2295	0.0425
YHR049W	YHR049W	0.4898	0.0437	0.2668	0.3155	0.2349	0.0424
YHR057C	CPR2	-0.0854	-0.0249	-0.0551	0.0428	0.2309	0.0419
YHR059W	FYV4	0.1138	0.0298	0.0718	0.0594	0.2313	0.0419
YHR061C	GIC1	0.1773	-0.0606	0.0583	0.1682	0.2314	0.0423
YHR066W	SSF1	0.0174	-0.2436	-0.1131	0.1845	0.2323	0.0435
YHR067W	RMD12	-0.458	-0.7703	-0.6142	0.2209	0.2185	0.0442
YHR073W	OSH3	0.5063	-0.1179	0.1942	0.4413	0.2329	0.0413
YHR075C	PPE1	0.0726	0.768	0.4203	0.4918	0.2379	0.0415
YHR076W	PTC7	0.2876	0.3931	0.3404	0.0746	0.2368	0.0411
YHR077C	NMD2	0.7008	0.6322	0.6665	0.0485	0.2431	0.042
YHR078W	YHR078W	0.3254	0.2583	0.2919	0.0474	0.2362	0.044
YHR079C	IRE1	0.1071	-0.4497	-0.1713	0.3937	0.2273	0.0425
YHR079C-B	YHR079C-B	0.2839	0.5165	0.4002	0.1644	0.2362	0.0402
YHR080C	YHR080C	-0.0744	0.2897	0.1077	0.2575	0.232	0.042
YHR081W	LRP1	-0.7995	-0.4877	-0.6436	0.2205	0.2178	0.043
YHR082C	KSP1	-0.1016	0.0745	-0.0136	0.1245	0.2325	0.044
YHR086W	NAM8	-0.001	0.1089	0.0539	0.0777	0.2332	0.0427
YHR087W	YHR087W	0.0271	-0.3302	-0.1515	0.2526	0.2278	0.0427
YHR092C	HXT4	0.17	-0.0679	0.0511	0.1682	0.2301	0.0401
YHR093W	AHT1	0.2141	-0.3337	-0.0598	0.3873	0.2311	0.0426
YHR094C	HXT1	0.1327	-0.1368	-0.0021	0.1906	0.2313	0.0454
YHR095W	YHR095W	-0.1545	-0.1076	-0.1311	0.0332	0.2282	0.0444
YHR096C	HXT5	0.6867	0.4705	0.5786	0.1529	0.2402	0.0388
YHR097C	YHR097C	-0.4393	-0.0306	-0.2349	0.289	0.2263	0.0414
YHR100C	YHR100C	0.0687	-0.2513	-0.0913	0.2263	0.2297	0.0462
YHR103W	SBE22	0.3733	0.4365	0.4049	0.0447	0.2366	0.0403
YHR104W	GRE3	0.6649	0.1247	0.3948	0.3819	0.2378	0.0424
YHR105W	YPT35	-0.0303	0.0491	0.0094	0.0562	0.2305	0.0425
YHR106W	TRR2	1.0659	0.1991	0.6325	0.6129	0.2457	0.0389
YHR108W	GGA2	0.1867	-0.0763	0.0552	0.186	0.2302	0.0403
YHR109W	CTM1	0.3056	-0.2229	0.0413	0.3737	0.2312	0.0426
YHR110W	ERP5	0.1136	-0.1112	0.0012	0.1589	0.2305	0.0433
YHR111W	UBA4	0.1708	0.2354	0.2031	0.0457	0.2347	0.0426
YHR112C	YHR112C	0.6638	0.571	0.6174	0.0656	0.2413	0.0378
YHR113W	YHR113W	0.1954	-0.1636	0.0159	0.2539	0.2301	0.0416
YHR114W	BZZ1	-0.2595	-0.5244	-0.392	0.1873	0.2235	0.0444
YHR115C	YHR115C	-0.1325	0.1527	0.0101	0.2017	0.2306	0.0427
YHR116W	YHR116W	-0.0932	-0.5057	-0.2994	0.2917	0.2251	0.0442
YHR117W	TOM71	-0.1889	-0.5341	-0.3615	0.2441	0.2239	0.0458
YHR121W	YHR121W	-0.1864	-0.0701	-0.1283	0.0823	0.2283	0.0436
YHR123W	EPT1	0.022	-0.1888	-0.0834	0.149	0.2309	0.0429
YHR124W	NDT80	0.4034	0.1754	0.2894	0.1612	0.2342	0.0402
YHR125W	YHR125W	-0.1523	-0.1168	-0.1345	0.025	0.2306	0.0451
YHR126C	YHR126C	0.2395	0.3522	0.2958	0.0797	0.2345	0.0396
YHR127W	YHR127W	0.0701	0.422	0.246	0.2488	0.2357	0.0445
YHR129C	ARP1	-0.1554	-0.0212	-0.0883	0.0949	0.2311	0.0434
YHR130C	YHR130C	0.0522	0.0943	0.0732	0.0298	0.2314	0.042
YHR131C	YHR131C	0.3791	-0.1302	0.1245	0.3601	0.2319	0.0406
YHR132C	ECM14	-0.3688	-0.4645	-0.4167	0.0676	0.2231	0.0438
YHR132W-A	YHR132W-A	-0.1213	0.0414	-0.0399	0.115	0.2294	0.0426
YHR133C	NSG1	0.2838	0.1029	0.1934	0.1279	0.2334	0.0416
YHR134W	WSS1	-0.1312	0.0632	-0.034	0.1374	0.2297	0.0428
YHR135C	YCK1	-0.1197	-0.1682	-0.144	0.0343	0.2281	0.045
YHR136C	SPL2	0.1547	0.4095	0.2821	0.1801	0.2351	0.0401
YHR137W	ARO9	-0.0379	-0.0487	-0.0433	0.0076	0.2282	0.0392
YHR138C	YHR138C	-0.1175	-0.4096	-0.2635	0.2065	0.2252	0.0408
YHR139C	SPS100	0.0098	0.0134	0.0116	0.0025	0.2303	0.0414
YHR139C-A	YHR139C-A	0.3263	-0.3043	0.011	0.4459	0.2319	0.041
YHR140W	YHR140W	0.1257	-0.0963	0.0147	0.157	0.232	0.0416
YHR142W	CHS7	0.2102	-0.0222	0.094	0.1644	0.2354	0.0427
YHR143W	DSE2	-0.1422	0.3331	0.0954	0.3361	0.232	0.0425
YHR146W	CRP1	0.2084	-0.1073	0.0506	0.2232	0.2313	0.0422
YHR147C	MRPL6	-0.0074	-0.2101	-0.1087	0.1434	0.2305	0.0429
YHR150W	PEX28	0.5729	0.2542	0.4136	0.2254	0.2391	0.0437
YHR151C	YHR151C	-0.1865	-0.5066	-0.3465	0.2264	0.2243	0.0432
YHR152W	SPO12	-0.0249	0.431	0.2031	0.3224	0.2341	0.0415
YHR153C	SPO16	0.2248	0.1958	0.2103	0.0205	0.2315	0.0383
YHR154W	RTT107	0.466	0.0555	0.2608	0.2902	0.2357	0.0419
YHR155W	YHR155W	0.02	-0.2159	-0.0979	0.1668	0.2289	0.0433
YHR156C	LIN1	0.5468	-0.0913	0.2278	0.4512	0.2342	0.041
YHR157W	REC104	0.3073	0.5297	0.4185	0.1573	0.2386	0.0417
YHR158C	KEL1	1.382	1.1405	1.2612	0.1707	0.258	0.0439
YHR159W	YHR159W	-0.0074	-0.241	-0.1242	0.1652	0.2305	0.0429
YHR160C	PEX18	0.2765	0.0941	0.1853	0.129	0.2347	0.0427
YHR161C	YAP1801	0.1763	0.2816	0.229	0.0745	0.234	0.0435
YHR162W	YHR162W	-0.1587	-0.0218	-0.0903	0.0968	0.2288	0.043
YHR163W	SOL3	0.3133	-0.193	0.0601	0.358	0.2314	0.0431
YHR167W	THP2	-0.1343	-0.2816	-0.2079	0.1042	0.2271	0.0468
YHR168W	YHR168W	-0.1252	-0.3459	-0.2355	0.1561	0.2311	0.0455
YHR171W	ATG7	-0.1903	0.4338	0.1217	0.4414	0.2328	0.043
YHR176W	FMO	0.0502	0.0339	0.0421	0.0115	0.2306	0.0413
YHR177W	GON3	0.2291	0.4407	0.3349	0.1496	0.2543	0.0497
YHR179W	OYE2	0.646	-0.323	0.1615	0.6851	0.2337	0.0441
YHR180W	YHR180W	-0.0834	0.1561	0.0363	0.1693	0.2302	0.0419
YHR181W	SVP26	-0.2641	-0.2526	-0.2584	0.0081	0.2274	0.0424
YHR182W	YHR182W	-0.2247	-0.301	-0.2628	0.054	0.2274	0.0423
YHR183W	GND1	0.1069	-0.2959	-0.0945	0.2848	0.2364	0.0455
YHR184W	SSP1	0.0511	-0.0099	0.0206	0.0432	0.23	0.0398
YHR185C	PFS1	-0.0074	-0.1659	-0.0866	0.1121	0.2305	0.0429
YHR189W	PTH1	-1.0256	-0.7058	-0.8657	0.2261	0.2111	0.0513
YHR191C	CTF8	0.4872	-0.2512	0.118	0.5221	0.235	0.0416
YHR193C	EGD2	0.8336	1.3577	1.0956	0.3706	0.2536	0.0424
YHR194W	MDM31	-0.2565	-0.6217	-0.4391	0.2582	0.2226	0.0441
YHR195W	NVJ1	0.3473	0.2741	0.3107	0.0517	0.2428	0.0397
YHR198C	FMP22	0.1663	0.4657	0.316	0.2117	0.2347	0.0391
YHR199C	FMP34	0.0835	0.2211	0.1523	0.0973	0.2325	0.0414
YHR200W	RPN10	1.0946	0.2714	0.683	0.5821	0.243	0.0395
YHR202W	YHR202W	1.2054	0.5676	0.8865	0.451	0.2479	0.0373
YHR203C	RPS4B	-0.3279	-0.3665	-0.3472	0.0273	0.2245	0.0435
YHR204W	MNL1	0.1207	-0.0242	0.0482	0.1025	0.2309	0.0413
YHR206W	SKN7	-0.2115	0.0265	-0.0925	0.1683	0.2291	0.0448
YHR207C	SET5	0.0467	0.0564	0.0515	0.0069	0.2314	0.0433
YHR209W	YHR209W	0.1827	0.0496	0.1162	0.0941	0.232	0.0418
YHR210C	YHR210C	1.0451	0.7399	0.8925	0.2158	0.2497	0.0375
YIL001W	YIL001W	0.2493	0.0135	0.1314	0.1667	0.2325	0.0426
YIL002C	INP51	0.0913	-0.017	0.0372	0.0765	0.2315	0.0475
YIL005W	EPS1	0.3497	-0.1233	0.1132	0.3345	0.233	0.0438
YIL006W	YIL006W	0.5335	0.1446	0.339	0.275	0.2401	0.0484
YIL007C	NAS2	0.3483	0.2002	0.2742	0.1047	0.2366	0.0458
YIL008W	URM1	-0.8204	-0.2463	-0.5334	0.4059	0.216	0.0489
YIL009C-A	EST3	0.1398	0.1011	0.1204	0.0274	0.2336	0.0432
YIL009W	FAA3	0.8356	1.3575	1.0966	0.369	0.2538	0.0432
YIL010W	DOT5	0.2969	0.184	0.2404	0.0799	0.2342	0.0415
YIL011W	TIR3	0.7677	1.475	1.1213	0.5001	0.2564	0.0469
YIL012W	YIL012W	0.894	1.1518	1.0229	0.1823	0.2501	0.0466
YIL013C	PDR11	0.1113	0.2617	0.1865	0.1063	0.2334	0.0422
YIL014W	MNT3	1.0392	1.6325	1.3358	0.4196	0.2569	0.0431
YIL015C-A	YIL015C-A	0.3473	-0.1418	0.1028	0.3458	0.2313	0.0415
YIL015W	BAR1	-0.0406	0.4628	0.2111	0.356	0.2373	0.0422
YIL016W	SNL1	0.2266	-0.1618	0.0324	0.2747	0.2308	0.042
YIL017C	VID28	-0.0124	-0.3128	-0.1626	0.2124	0.2277	0.0428
YIL020C	HIS6	0.1604	0.0743	0.1174	0.0609	0.2325	0.0431
YIL023C	YIL023C	-0.1562	-0.1355	-0.1459	0.0147	0.23	0.0432
YIL024C	YIL024C	0.1184	0.1961	0.1573	0.055	0.2364	0.0408
YIL025C	YIL025C	0.4358	0.0252	0.2305	0.2903	0.2455	0.0388
YIL027C	KRE27	0.763	0.3563	0.5597	0.2876	0.2402	0.0411
YIL028W	YIL028W	0.4603	-0.0565	0.2019	0.3655	0.2357	0.045
YIL029C	YIL029C	0.2948	0.2119	0.2534	0.0586	0.2356	0.0415
YIL030C	SSM4	0.2299	0.3198	0.2748	0.0635	0.2345	0.0412
YIL032C	YIL032C	0.2514	0.2434	0.2474	0.0057	0.238	0.0438
YIL034C	CAP2	-0.3454	-0.2471	-0.2963	0.0695	0.2254	0.0435
YIL035C	CKA1	-0.0074	-0.2095	-0.1084	0.1429	0.2305	0.0429
YIL036W	CST6	-0.492	-0.9433	-0.7176	0.3191	0.2127	0.0505
YIL037C	PRM2	0.4153	0.4019	0.4086	0.0094	0.2414	0.0382
YIL038C	NOT3	-0.2174	-0.2069	-0.2121	0.0074	0.2185	0.0494
YIL039W	YIL039W	-0.5459	0.2583	-0.1438	0.5686	0.2272	0.0404
YIL040W	APQ12	-0.0653	-0.2535	-0.1594	0.1331	0.231	0.0502
YIL041W	GVP36	-0.2565	0.0353	-0.1106	0.2063	0.2287	0.0434
YIL042C	YIL042C	0.3693	0.1629	0.2661	0.146	0.2359	0.0446
YIL043C	CBR1	0.307	0.2205	0.2638	0.0612	0.2351	0.0424
YIL044C	AGE2	-0.0766	0.2119	0.0677	0.204	0.232	0.0482
YIL045W	PIG2	0.3318	-0.264	0.0339	0.4213	0.2309	0.0427
YIL047C	SYG1	0.2892	1.2261	0.7577	0.6625	0.2452	0.0413
YIL050W	PCL7	0.6922	0.3976	0.5449	0.2083	0.2414	0.0433
YIL052C	RPL34B	-1.1258	-1.4154	-1.2706	0.2048	0.2082	0.0441
YIL053W	RHR2	0.5549	0.6145	0.5847	0.0422	0.2411	0.042
YIL054W	YIL054W	0.0161	0.1979	0.107	0.1285	0.2327	0.0446
YIL055C	YIL055C	0.3164	-0.0254	0.1455	0.2417	0.2328	0.042
YIL056W	YIL056W	-0.0271	-0.1393	-0.0832	0.0794	0.2319	0.0447
YIL057C	YIL057C	0.3884	-0.0336	0.1774	0.2983	0.2291	0.0421
YIL058W	YIL058W	-0.022	-0.1256	-0.0738	0.0732	0.2284	0.0395
YIL059C	YIL059C	0.2055	-0.2162	-0.0054	0.2982	0.2307	0.0436
YIL060W	YIL060W	0.2137	0.205	0.2094	0.0062	0.2333	0.0402
[truncated: 2,487 more rows]
