# Supplementary material for: Microfluidic genome-wide profiling of intrinsic electrical properties in Saccharomyces cerevisiae
Source: Royal Society of Chemistry journal article supplement (doi:10.1039/c3lc50162k), 2013-01-01
Supplement: c3lc50162k_3.xlsx [file c3lc50162k_3.xlsx]

## Sheet: Sheet1
Electrical Properties	Decreased, 10MHz		Decreased, 10MHz		Decreased, 10MHz		Decreased, 10MHz		Decreased, 10MHz		Decreased, 10MHz		Increased, 10MHz		Decreased, 300kHz		Decreased, 300kHz		Increased, 300kHz
Enriched GO Term	Translation		RNA Met. Process		Mitochondrion Org.		Ribosome Biogen.		Membrane Org.		Vesicle Org.		Cell Cycle		RNA Met. Process		Transcription		Response to Stress
	Systematic name	Standard name	Systematic name	Standard name	Systematic name	Standard name	Systematic name	Standard name	Systematic name	Standard name	Systematic name	Standard name	Systematic name	Standard name	Systematic name	Standard name	Systematic name	Standard name	Systematic name	Standard name
	YBL027W	RPL19B	YBL072C	RPS8A	YBL080C	PET112	YBL072C	RPS8A	YBL007C	SLA1	YDR080W	VPS41	YCL055W	KAR4	YBL072C	RPS8A	YCR084C	TUP1	YBR126C	TPS1
	YBL072C	RPS8A	YBL080C	PET112	YBR179C	FZO1	YBR181C	RPS6B	YBR077C	YBR077C	YDR323C	PEP7	YCR002C	CDC10	YDL006W	PTC1	YGL025C	PGD1	YCR009C	RVS161
	YBL080C	PET112	YBR181C	RPS6B	YCR003W	MRPL32	YBR189W	RPS9B	YBR179C	FZO1	YEL013W	VAC8	YCR020W-B	HTL1	YDR120C	TRM1	YGR104C	SRB5	YDL047W	SIT4
	YBR181C	RPS6B	YBR189W	RPS9B	YCR028C-A	RIM1	YDL063C	YDL063C	YBR266C	YBR266C	YFL025C	BST1	YDL074C	BRE1	YGL025C	PGD1	YHR006W	STP2	YDL101C	DUN1
	YBR189W	RPS9B	YDL006W	PTC1	YCR071C	IMG2	YDL136W	RPL35B	YCR009C	RVS161	YIL076W	SEC28	YDR217C	RAD9	YGR104C	SRB5	YJL176C	SWI3	YDR074W	TPS2
	YBR191W	RPL21A	YDL136W	RPL35B	YDL006W	PTC1	YDR083W	RRP8	YDR080W	VPS41	YOR106W	VAM3	YDR310C	SUM1	YHR006W	STP2	YKR099W	BAS1	YDR477W	SNF1
	YCR003W	MRPL32	YDR083W	RRP8	YDR115W	YDR115W	YDR418W	RPL12B	YDR323C	PEP7	YPR173C	VPS4	YGL033W	HOP2	YJL176C	SWI3	YLR131C	ACE2	YER062C	HOR2
	YCR071C	IMG2	YDR392W	SPT3	YDR231C	COX20	YER074W	RPS24A	YDR388W	RVS167			YGL045W	RIM8	YKR099W	BAS1	YLR182W	SWI6	YGL087C	MMS2
	YDL075W	RPL31A	YER068W	MOT2	YDR322W	MRPL35	YGL064C	MRH4	YEL013W	VAC8			YGL054C	ERV14	YLR131C	ACE2	YMR307W	GAS1	YHL027W	RIM101
	YDL082W	RPL13A	YER074W	RPS24A	YDR350C	TCM10	YGL246C	RAI1	YGR163W	GTR2			YGL175C	SAE2	YLR182W	SWI6	YNL206C	RTT106	YKL143W	LTV1
	YDL136W	RPL35B	YGL105W	ARC1	YDR405W	MRP20	YGR085C	RPL11B	YHR004C	NEM1			YGL215W	CLG1	YMR307W	GAS1	YNL236W	SIN4	YLL002W	RTT109
	YDR115W	YDR115W	YGL246C	RAI1	YDR529C	QCR7	YGR159C	NSR1	YIL076W	SEC28			YHR039C	MSC7	YNL206C	RTT106	YOR113W	AZF1	YLL026W	HSP104
	YDR322W	MRPL35	YGR104C	SRB5	YGL219C	MDM34	YKL009W	MRT4	YKL126W	YPK1			YHR158C	KEL1	YNL236W	SIN4	YOR140W	SFL1	YLR025W	SNF7
	YDR350C	TCM10	YGR159C	NSR1	YGR076C	MRPL25	YKL143W	LTV1	YKR007W	YKR007W			YJL080C	SCP160	YOR113W	AZF1	YOR290C	SNF2	YLR079W	SIC1
	YDR382W	RPP2B	YGR163W	GTR2	YHR189W	PTH1	YKR024C	DBP7	YNL297C	MON2			YLL049W	YLL049W	YOR140W	SFL1	YPL042C	SSN3	YLR320W	MMS22
	YDR405W	MRP20	YGR171C	MSM1	YJL063C	MRPL8	YLR068W	FYV7	YOR008C	SLG1			YLR248W	RCK2	YOR290C	SNF2	YPR179C	PLO1	YML021C	UNG1
	YDR418W	RPL12B	YJL176C	SWI3	YJR144W	MGM101	YLR435W	TSR2	YOR106W	VAM3			YML027W	YOX1	YPL042C	SSN3			YMR140W	SIP5
	YDR477W	SNF1	YJR063W	RPA12	YKL170W	MRPL38	YLR448W	RPL6B	YOR211C	MGM1			YPR111W	DBF20	YPR179C	PLO1			YMR152W	YIM1
	YER074W	RPS24A	YKL009W	MRT4	YKL194C	MST1	YML024W	RPS17A	YOR297C	TIM18			YPR119W	CLB2					YNL107W	YAF9
	YGL076C	RPL7A	YKL194C	MST1	YLR312W-A	MRPL15	YMR143W	RPS16A	YOR322C	YOR322C									YNL246W	VPS75
	YGL105W	ARC1	YKR024C	DBP7	YLR382C	NAM2	YMR230W	RPS10B	YPR173C	VPS4									YOL072W	THP1
	YGL135W	RPL1B	YLR052W	IES3	YMR150C	IMP1	YNL147W	LSM7											YOL081W	IRA2
	YGR076C	MRPL25	YLR068W	FYV7	YNL005C	MRP7	YOL041C	NOP12											YOL115W	TRF4
	YGR085C	RPL11B	YLR131C	ACE2	YNL081C	SWS2	YPL193W	RSA1											YOR043W	WHI2
	YGR171C	MSM1	YLR182W	SWI6	YNL213C	YNL213C													YOR141C	ARP8
	YHR189W	PTH1	YLR204W	QRI5	YNL315C	ATP11													YPL154C	PEP4
	YIL052C	RPL34B	YLR382C	NAM2	YOL076W	MDM20
	YJL063C	MRPL8	YLR417W	VPS36	YOR211C	MGM1
	YJL189W	RPL39	YLR435W	TSR2	YOR297C	TIM18
	YKL170W	MRPL38	YML121W	GTR1
	YKL194C	MST1	YMR143W	RPS16A
	YLR185W	RPL37A	YMR287C	MSU1
	YLR287C-A	RPS30A	YMR293C	YMR293C
	YLR312W-A	MRPL15	YMR307W	GAS1
	YLR382C	NAM2	YMR312W	ELP6
	YLR448W	RPL6B	YNL147W	LSM7
	YML024W	RPS17A	YNL299W	TRF5
	YMR143W	RPS16A	YOL004W	SIN3
	YMR230W	RPS10B	YOL041C	NOP12
	YMR242C	RPL20A	YPL002C	SNF8
	YNL005C	MRP7	YPL042C	SSN3
	YNL069C	RPL16B	YPL129W	TAF14
	YNL081C	SWS2
